# Supplementary material
Source: MDPI journal article supplement (https://www.mdpi.com/2073-8994/14/2/317)
Supplement: s1 [file s1]

## SUPPLEMENTARY INFORMATION

# Conformers selection by electrostatic hexapoles: a theoretical study on 1-chloroethanol and 2-chloroethanol

Concetta Caglioti<sup>1,2</sup>, Masaaki Nakamura<sup>3</sup>, Dock-Chil Che<sup>4</sup>, Po-Yu Tsai<sup>5</sup>, Federico Palazzetti<sup>1,\*</sup>

<sup>1</sup> Dipartimento di Chimica, Biologia e Biotecnologie, Università degli Studi di Perugia, Perugia, Italy.

<sup>2</sup> Dipartimento di Medicina, Università degli Studi di Perugia, Perugia, Italy.

<sup>3</sup> Department of Chemistry, School of Science, Tokyo Institute of Technology, Meguro, Tokyo 152-8550, Japan

<sup>4</sup> Department of Chemistry, Graduate School of Science, Osaka University, Toyonaka, Osaka 560-0043, Japan.

<sup>5</sup> Department of Chemistry, National Chung Hsing University, Taichung 402, Taiwan

\* Corresponding author: federicopalazzetti@yahoo.it

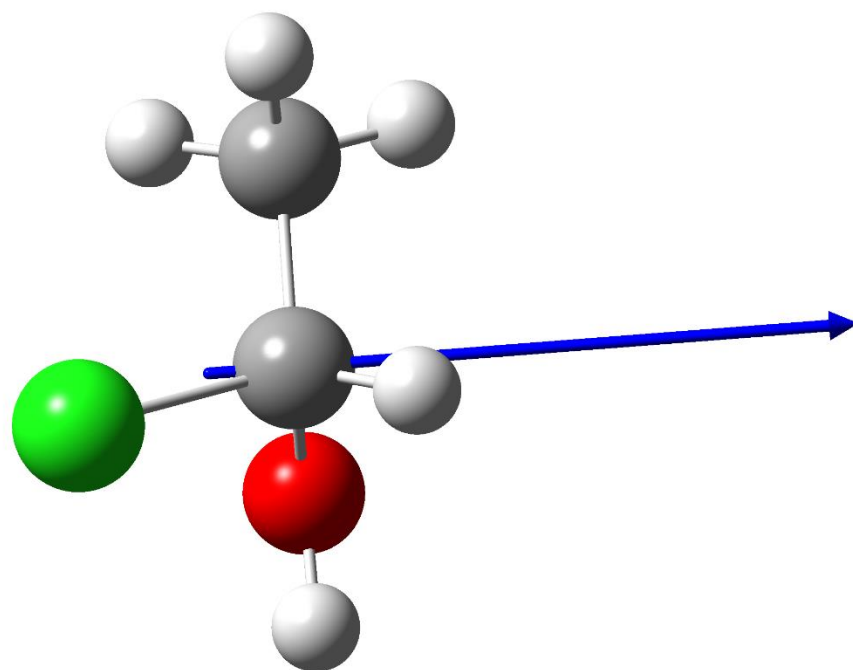

**Figure S1.** The permanent electric dipole moment vector (blue arrow) in (A) 1-chloroethanol. In grey the carbon atoms, in white the hydrogens, in red the oxygen, and in green the chlorine atom.

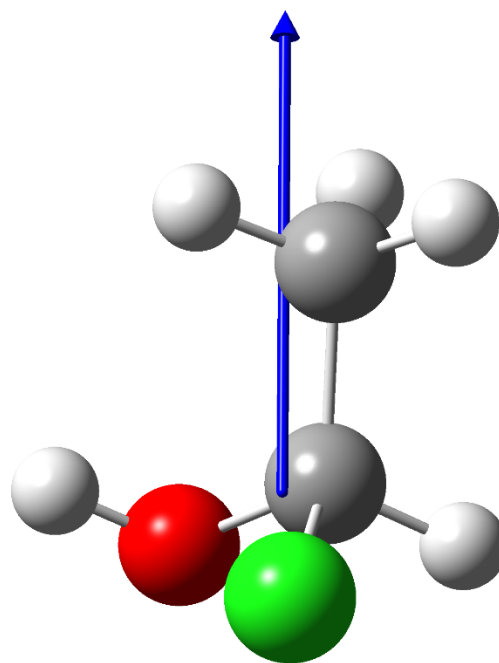

**Figure S2.** The permanent electric dipole moment vector (blue arrow) in (S) 1-chloroethanol. In grey the carbon atoms, in white the hydrogens, in red the oxygen, and in green the chlorine atom.

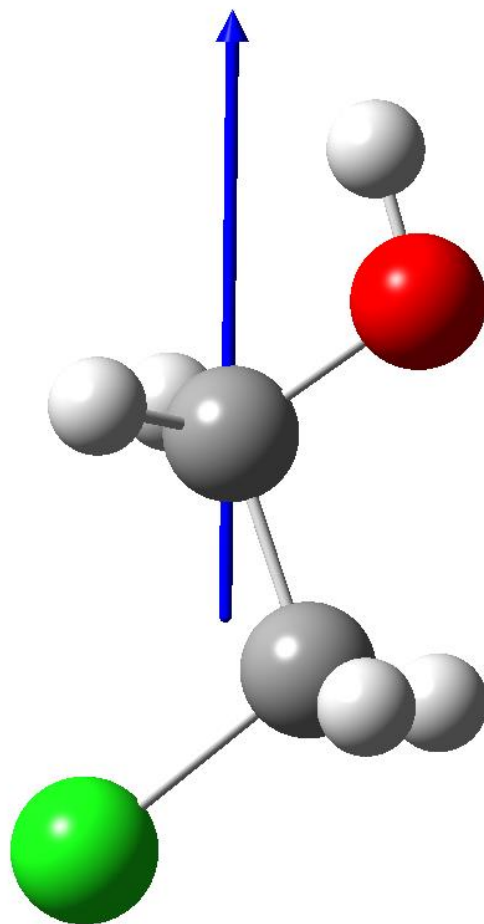

**Figure S3.** The permanent electric dipole moment vector (blue arrow) in (Aa) 2-chloroethanol. In grey the carbon atoms, in white the hydrogens, in red the oxygen, and in green the chlorine atom.

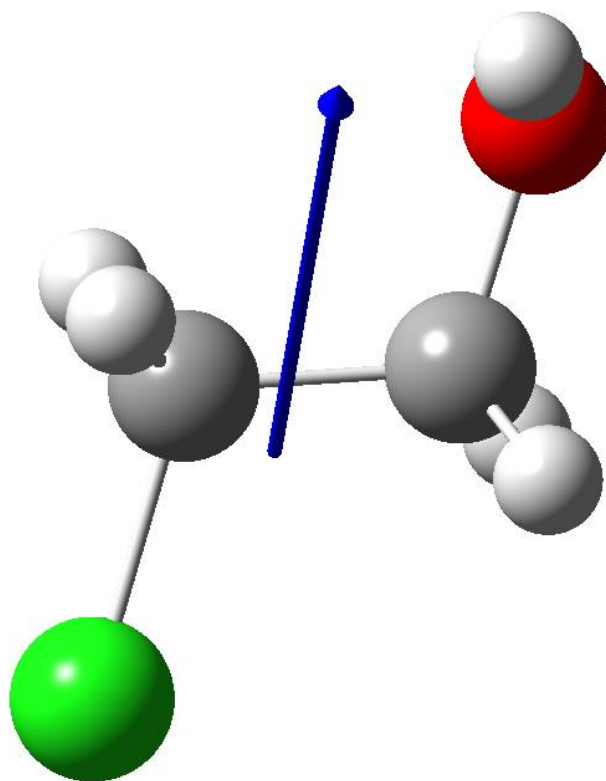

**Figure S4.** The permanent electric dipole moment vector (blue arrow) in (As) 2-chloroethanol. In grey the carbon atoms, in white the hydrogens, in red the oxygen, and in green the chlorine atom.

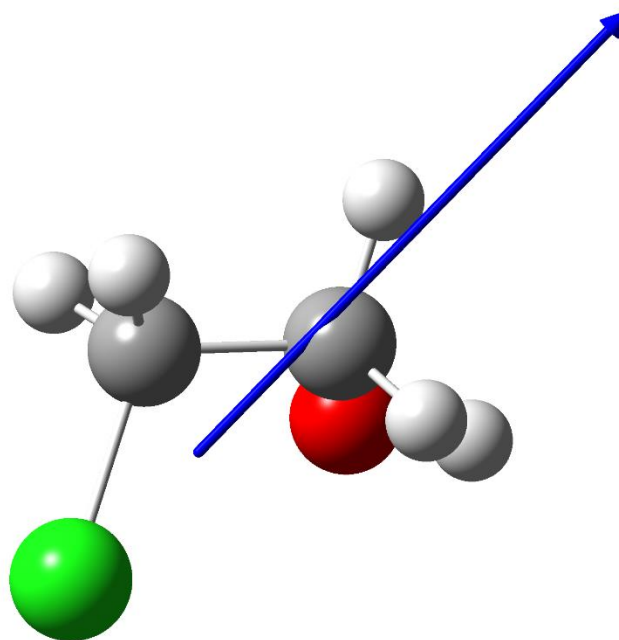

**Figure S5.** The permanent electric dipole moment vector (blue arrow) in (S)-2-chloroethanol. In grey the carbon atoms, in white the hydrogens, in red the oxygen, and in green the chlorine atom.

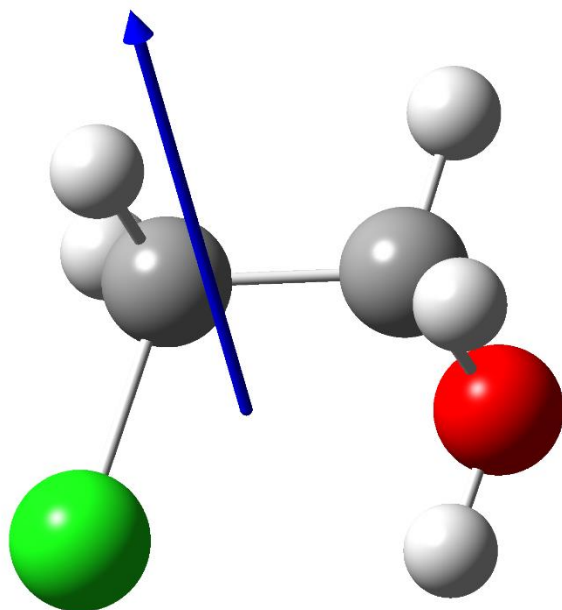

**Figure S6.** The permanent electric dipole moment vector (blue arrow) in (Ss+) 2-chloroethanol. In grey the carbon atoms, in white the hydrogens, in red the oxygen, and in green the chlorine atom.

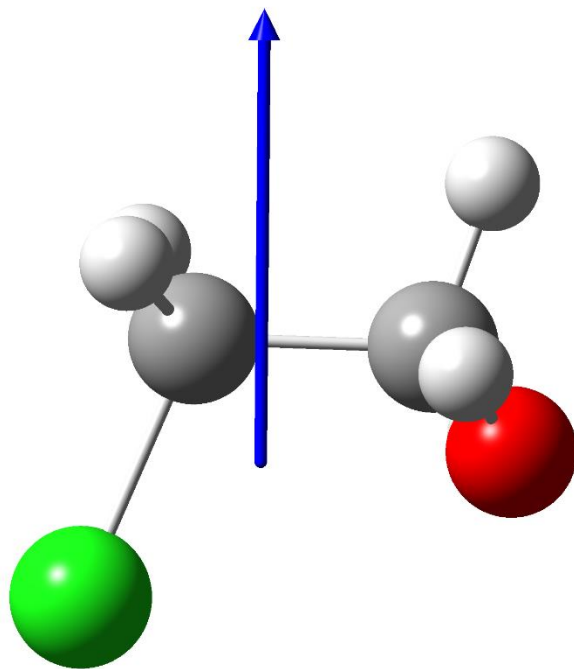

**Figure S7.** The permanent electric dipole moment vector (blue arrow) in (Ss-) 2-chloroethanol. In grey the carbon atoms, in white the hydrogens, in red the oxygen, and in green the chlorine atom.



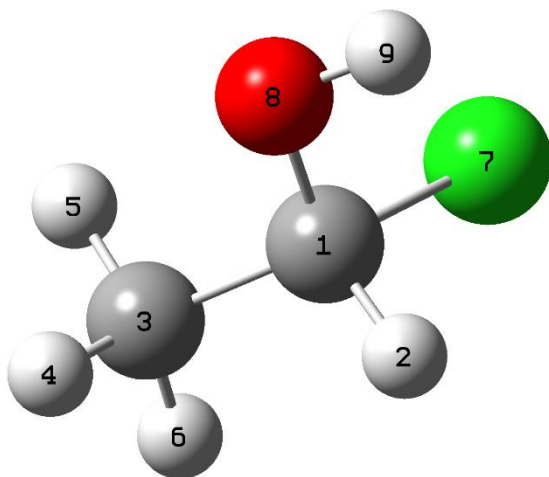

**Figure S8.** Structure of 1-chloroethanol with atoms labeled from 1 to 9, to be used as reference in Tables S1 and S2.

**Table S1.** Equilibrium geometry of (A)-1-chloroethanol (in Cartesian coordinates *xyz*) optimized at MP2/aug-cc-pVTZ.

| Atom | Tag | X        | Y        | Z        |
|------|-----|----------|----------|----------|
| C    | 1   | -0.42105 | 0.092544 | 0.382499 |
| H    | 2   | -0.41853 | 0.163101 | 1.473433 |
| C    | 3   | -1.20922 | -1.09947 | -0.10168 |
| H    | 4   | -2.25474 | -0.97889 | 0.193346 |
| H    | 5   | -1.14528 | -1.15953 | -1.18982 |
| H    | 6   | -0.81404 | -2.01934 | 0.331834 |
| Cl   | 7   | 1.324158 | -0.10966 | -0.05822 |
| O    | 8   | -0.95211 | 1.237458 | -0.20581 |
| H    | 9   | -0.47965 | 2.00083  | 0.142509 |

**Table S2.** Equilibrium geometry of (S) 1-chloroethanol (in Cartesian coordinates *xyz*) optimized at MP2/aug-cc-pVTZ.

| Atom | Tag | X        | Y        | Z        |
|------|-----|----------|----------|----------|
| C    | 1   | 0.425882 | -0.08761 | 0.399038 |
| H    | 2   | 0.426263 | -0.14733 | 1.482894 |
| C    | 3   | 1.168564 | 1.121678 | -0.11473 |
| H    | 4   | 2.215487 | 1.044222 | 0.176144 |
| H    | 5   | 1.099732 | 1.16642  | -1.20168 |
| H    | 6   | 0.743839 | 2.034664 | 0.295339 |
| Cl   | 7   | -1.32588 | 0.077045 | -0.05717 |
| O    | 8   | 0.940236 | -1.29363 | -0.05798 |
| H    | 9   | 0.966153 | -1.26318 | -1.02287 |

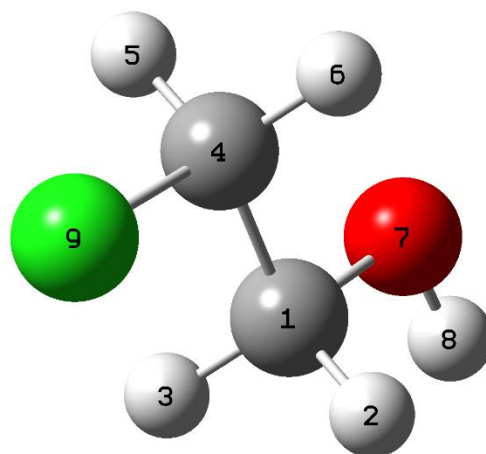

**Figure S9.** Structure of 2-chloroethanol with atoms labeled from 1 to 9, to be used as reference in Tables S3 - S7.

**Table S3.** Equilibrium geometry of (Aa) 2-chloroethanol (in Cartesian coordinates *xyz*) optimized at MP2/aug-cc-pVTZ.

| Atom | Tag | X        | Y        | Z        |
|------|-----|----------|----------|----------|
| C    | 1   | 0.991645 | -0.48561 | -4E-06   |
| H    | 2   | 0.864092 | -1.1093  | 0.887531 |
| H    | 3   | 0.864018 | -1.10931 | -0.88753 |
| C    | 4   | -0.04627 | 0.612598 | 0.000036 |
| H    | 5   | 0.043783 | 1.23077  | -0.88811 |
| H    | 6   | 0.043767 | 1.2307   | 0.88823  |
| O    | 7   | 2.253585 | 0.174076 | -6.5E-05 |
| H    | 8   | 2.945948 | -0.49427 | 0.000321 |
| Cl   | 9   | -1.67427 | -0.11195 | -7E-06   |

**Table S4.** Equilibrium geometry of (As) 2-chloroethanol (in Cartesian coordinates *xyz*) optimized at MP2/aug-cc-pVTZ.

| Atom | Tag | X        | Y        | Z        |
|------|-----|----------|----------|----------|
| C    | 1   | 0.994771 | -0.49371 | 0.003251 |
| H    | 2   | 0.861614 | -1.09238 | 0.906711 |
| H    | 3   | 0.871824 | -1.14716 | -0.8577  |
| C    | 4   | -0.04239 | 0.611316 | -0.0429  |
| H    | 5   | 0.039547 | 1.181407 | -0.96347 |
| H    | 6   | 0.048662 | 1.279445 | 0.810531 |
| O    | 7   | 2.30668  | 0.048409 | -0.08527 |
| H    | 8   | 2.532076 | 0.436206 | 0.76639  |
| Cl   | 9   | -1.67773 | -0.10297 | 0.015152 |

**Table S5.** Equilibrium geometry of (Sa) 2-chloroethanol (in Cartesian coordinates *xyz*) optimized at MP2/aug-cc-pVTZ.

| Atom | Tag | X        | Y        | Z        |
|------|-----|----------|----------|----------|
| C    | 1   | 1.168982 | 0.457013 | 0.365529 |
| H    | 2   | 1.873937 | 1.287344 | 0.246399 |
| H    | 3   | 0.99738  | 0.291886 | 1.431587 |
| C    | 4   | -0.12382 | 0.848251 | -0.30093 |
| H    | 5   | -0.00349 | 0.861453 | -1.38113 |
| H    | 6   | -0.45295 | 1.823569 | 0.047874 |
| O    | 7   | 1.65534  | -0.71383 | -0.27244 |
| H    | 8   | 2.357445 | -1.0878  | 0.268131 |
| Cl   | 9   | -1.42859 | -0.31161 | 0.069356 |

**Table S6.** Equilibrium geometry of (Ss+) 2-chloroethanol (in Cartesian coordinates *xyz*) optimized at MP2/aug-cc-pVTZ.

| Atom | Tag | X        | Y        | Z        |
|------|-----|----------|----------|----------|
| C    | 1   | 1.201537 | 0.452901 | 0.33932  |
| H    | 2   | 1.966686 | 1.198874 | 0.123069 |
| H    | 3   | 1.081333 | 0.3838   | 1.424053 |
| C    | 4   | -0.09852 | 0.902459 | -0.28691 |
| H    | 5   | -0.01329 | 0.96108  | -1.36839 |
| H    | 6   | -0.42767 | 1.855404 | 0.119995 |
| O    | 7   | 1.669663 | -0.76485 | -0.20756 |
| H    | 8   | 0.980139 | -1.42414 | -0.05941 |
| Cl   | 9   | -1.38604 | -0.29343 | 0.065101 |

**Table S7.** Equilibrium geometry of (Ss-) 2-chloroethanol (in Cartesian coordinates *xyz*) optimized at MP2/aug-cc-pVTZ.

| Atom | Tag | X        | Y        | Z        |
|------|-----|----------|----------|----------|
| C    | 1   | 1.180091 | 0.457373 | -0.36063 |
| H    | 2   | 1.02796  | 0.34901  | -1.43264 |
| H    | 3   | 1.899833 | 1.267449 | -0.19594 |
| C    | 4   | -0.12065 | 0.852206 | 0.3032   |
| H    | 5   | -0.4441  | 1.828432 | -0.05189 |
| H    | 6   | -0.01849 | 0.883023 | 1.386796 |
| O    | 7   | 1.692927 | -0.78447 | 0.085433 |
| H    | 8   | 1.884395 | -0.7144  | 1.026606 |
| Cl   | 9   | -1.42645 | -0.3056  | -0.06305 |

**Table S8.** Rotational population as a function of the hexapole voltage (HV) as a function of the hexapole voltage (HV) of Aa 2-chloroethanol in 0.5 m hexapole

| HV       | M=0  | M=1  | M=2  | M=3  | M=4  | M=5  | M=6  | M=7  | M=8  | M=9  | M=10 | M=11 | M=12 | M=13 | M=14 | M=15 | M=16 | M=17 | M=18 | M=19 | M=20 | M=21 | M=22 | M=23 |
|----------|------|------|------|------|------|------|------|------|------|------|------|------|------|------|------|------|------|------|------|------|------|------|------|------|
| 0.00     | 0.03 | 0.03 | 0.03 | 0.03 | 0.03 | 0.02 | 0.02 | 0.02 | 0.02 | 0.01 | 0.01 | 0.01 | 0.01 | 0.01 | 0.01 | 0.00 | 0.00 | 0.00 | 0.00 | 0.00 | 0.00 | 0.00 | 0.00 | 0.00 |
| 666.60   | 0.03 | 0.03 | 0.03 | 0.03 | 0.03 | 0.03 | 0.02 | 0.02 | 0.02 | 0.01 | 0.01 | 0.01 | 0.01 | 0.01 | 0.01 | 0.00 | 0.00 | 0.00 | 0.00 | 0.00 | 0.00 | 0.00 | 0.00 | 0.00 |
| 1333.20  | 0.03 | 0.04 | 0.04 | 0.03 | 0.03 | 0.03 | 0.02 | 0.02 | 0.02 | 0.02 | 0.01 | 0.01 | 0.01 | 0.01 | 0.01 | 0.00 | 0.00 | 0.00 | 0.00 | 0.00 | 0.00 | 0.00 | 0.00 | 0.00 |
| 1999.80  | 0.03 | 0.04 | 0.04 | 0.04 | 0.03 | 0.03 | 0.03 | 0.02 | 0.02 | 0.02 | 0.01 | 0.01 | 0.01 | 0.01 | 0.01 | 0.00 | 0.00 | 0.00 | 0.00 | 0.00 | 0.00 | 0.00 | 0.00 | 0.00 |
| 2666.40  | 0.03 | 0.04 | 0.04 | 0.04 | 0.04 | 0.03 | 0.03 | 0.03 | 0.02 | 0.02 | 0.01 | 0.01 | 0.01 | 0.01 | 0.01 | 0.01 | 0.00 | 0.00 | 0.00 | 0.00 | 0.00 | 0.00 | 0.00 | 0.00 |
| 3333.00  | 0.03 | 0.04 | 0.05 | 0.06 | 0.06 | 0.05 | 0.04 | 0.03 | 0.03 | 0.02 | 0.02 | 0.01 | 0.01 | 0.01 | 0.01 | 0.01 | 0.00 | 0.00 | 0.00 | 0.00 | 0.00 | 0.00 | 0.00 | 0.00 |
| 3999.60  | 0.03 | 0.04 | 0.10 | 0.12 | 0.10 | 0.09 | 0.07 | 0.05 | 0.04 | 0.03 | 0.02 | 0.01 | 0.01 | 0.01 | 0.01 | 0.01 | 0.00 | 0.00 | 0.00 | 0.00 | 0.00 | 0.00 | 0.00 | 0.00 |
| 4666.20  | 0.03 | 0.04 | 0.15 | 0.13 | 0.16 | 0.12 | 0.10 | 0.07 | 0.05 | 0.04 | 0.03 | 0.02 | 0.01 | 0.01 | 0.01 | 0.01 | 0.00 | 0.00 | 0.00 | 0.00 | 0.00 | 0.00 | 0.00 | 0.00 |
| 5332.80  | 0.03 | 0.06 | 0.14 | 0.19 | 0.19 | 0.17 | 0.13 | 0.10 | 0.07 | 0.05 | 0.04 | 0.03 | 0.02 | 0.01 | 0.01 | 0.01 | 0.00 | 0.00 | 0.00 | 0.00 | 0.00 | 0.00 | 0.00 | 0.00 |
| 5999.40  | 0.03 | 0.12 | 0.16 | 0.27 | 0.20 | 0.22 | 0.16 | 0.13 | 0.10 | 0.07 | 0.05 | 0.03 | 0.02 | 0.02 | 0.01 | 0.01 | 0.01 | 0.00 | 0.00 | 0.00 | 0.00 | 0.00 | 0.00 | 0.00 |
| 6666.00  | 0.03 | 0.15 | 0.17 | 0.29 | 0.28 | 0.23 | 0.21 | 0.15 | 0.12 | 0.09 | 0.06 | 0.05 | 0.03 | 0.02 | 0.02 | 0.01 | 0.01 | 0.01 | 0.00 | 0.00 | 0.00 | 0.00 | 0.00 | 0.00 |
| 7332.60  | 0.03 | 0.14 | 0.19 | 0.26 | 0.35 | 0.26 | 0.22 | 0.19 | 0.14 | 0.11 | 0.08 | 0.06 | 0.04 | 0.03 | 0.02 | 0.01 | 0.01 | 0.01 | 0.00 | 0.00 | 0.00 | 0.00 | 0.00 | 0.00 |
| 7999.20  | 0.03 | 0.15 | 0.24 | 0.26 | 0.35 | 0.33 | 0.23 | 0.21 | 0.17 | 0.13 | 0.10 | 0.07 | 0.05 | 0.04 | 0.03 | 0.02 | 0.01 | 0.01 | 0.01 | 0.00 | 0.00 | 0.00 | 0.00 | 0.00 |
| 8665.80  | 0.03 | 0.17 | 0.31 | 0.31 | 0.33 | 0.38 | 0.27 | 0.22 | 0.20 | 0.15 | 0.11 | 0.09 | 0.07 | 0.05 | 0.04 | 0.02 | 0.02 | 0.01 | 0.01 | 0.01 | 0.00 | 0.00 | 0.00 | 0.00 |
| 9332.40  | 0.03 | 0.18 | 0.36 | 0.38 | 0.35 | 0.39 | 0.31 | 0.24 | 0.21 | 0.17 | 0.13 | 0.11 | 0.08 | 0.06 | 0.04 | 0.03 | 0.02 | 0.02 | 0.01 | 0.01 | 0.00 | 0.00 | 0.00 | 0.00 |
| 9999.00  | 0.03 | 0.19 | 0.38 | 0.40 | 0.40 | 0.38 | 0.34 | 0.26 | 0.22 | 0.19 | 0.16 | 0.12 | 0.10 | 0.07 | 0.05 | 0.04 | 0.03 | 0.02 | 0.01 | 0.01 | 0.01 | 0.00 | 0.00 | 0.00 |
| 10665.60 | 0.03 | 0.19 | 0.38 | 0.39 | 0.43 | 0.40 | 0.35 | 0.29 | 0.23 | 0.20 | 0.18 | 0.14 | 0.11 | 0.08 | 0.06 | 0.04 | 0.03 | 0.02 | 0.02 | 0.01 | 0.01 | 0.00 | 0.00 | 0.00 |
| 11332.20 | 0.03 | 0.19 | 0.37 | 0.37 | 0.45 | 0.42 | 0.36 | 0.32 | 0.24 | 0.21 | 0.19 | 0.15 | 0.12 | 0.09 | 0.07 | 0.05 | 0.04 | 0.03 | 0.02 | 0.01 | 0.01 | 0.01 | 0.00 | 0.00 |
| 11998.80 | 0.03 | 0.19 | 0.36 | 0.38 | 0.44 | 0.44 | 0.37 | 0.34 | 0.27 | 0.22 | 0.19 | 0.17 | 0.13 | 0.10 | 0.07 | 0.06 | 0.04 | 0.03 | 0.02 | 0.02 | 0.01 | 0.01 | 0.00 | 0.00 |
| 12665.40 | 0.04 | 0.20 | 0.39 | 0.41 | 0.45 | 0.45 | 0.37 | 0.34 | 0.29 | 0.23 | 0.20 | 0.17 | 0.14 | 0.11 | 0.08 | 0.06 | 0.05 | 0.03 | 0.02 | 0.02 | 0.01 | 0.01 | 0.00 | 0.00 |
| 13332.00 | 0.04 | 0.22 | 0.42 | 0.46 | 0.46 | 0.45 | 0.38 | 0.35 | 0.31 | 0.24 | 0.20 | 0.17 | 0.15 | 0.12 | 0.09 | 0.07 | 0.05 | 0.04 | 0.03 | 0.02 | 0.01 | 0.01 | 0.01 | 0.00 |
| 13998.60 | 0.04 | 0.23 | 0.45 | 0.51 | 0.48 | 0.45 | 0.39 | 0.36 | 0.32 | 0.26 | 0.20 | 0.18 | 0.15 | 0.13 | 0.10 | 0.07 | 0.06 | 0.04 | 0.03 | 0.02 | 0.02 | 0.01 | 0.01 | 0.00 |
| 14665.20 | 0.05 | 0.25 | 0.47 | 0.53 | 0.50 | 0.46 | 0.39 | 0.36 | 0.32 | 0.27 | 0.21 | 0.18 | 0.16 | 0.13 | 0.10 | 0.08 | 0.06 | 0.04 | 0.03 | 0.02 | 0.02 | 0.01 | 0.01 | 0.00 |

**Table S9.** Rotational population as a function of the hexapole voltage (HV) as a function of the hexapole voltage (HV) of As 2-chloroethanol in 0.5 m hexapole

| HV       | M=0  | M=1  | M=2  | M=3  | M=4  | M=5  | M=6  | M=7  | M=8  | M=9  | M=10 | M=11 | M=12 | M=13 | M=14 | M=15 | M=16 | M=17 | M=18 | M=19 | M=20 | M=21 | M=22 | M=23 |
|----------|------|------|------|------|------|------|------|------|------|------|------|------|------|------|------|------|------|------|------|------|------|------|------|------|
| 0.00     | 0.04 | 0.03 | 0.03 | 0.03 | 0.03 | 0.03 | 0.02 | 0.02 | 0.02 | 0.01 | 0.01 | 0.01 | 0.01 | 0.01 | 0.01 | 0.00 | 0.00 | 0.00 | 0.00 | 0.00 | 0.00 | 0.00 | 0.00 | 0.00 |
| 666.60   | 0.04 | 0.03 | 0.03 | 0.03 | 0.03 | 0.03 | 0.02 | 0.02 | 0.02 | 0.01 | 0.01 | 0.01 | 0.01 | 0.01 | 0.01 | 0.00 | 0.00 | 0.00 | 0.00 | 0.00 | 0.00 | 0.00 | 0.00 | 0.00 |
| 1333.20  | 0.04 | 0.03 | 0.03 | 0.03 | 0.03 | 0.03 | 0.02 | 0.02 | 0.02 | 0.01 | 0.01 | 0.01 | 0.01 | 0.01 | 0.01 | 0.00 | 0.00 | 0.00 | 0.00 | 0.00 | 0.00 | 0.00 | 0.00 | 0.00 |
| 1999.80  | 0.04 | 0.03 | 0.03 | 0.03 | 0.03 | 0.03 | 0.02 | 0.02 | 0.02 | 0.01 | 0.01 | 0.01 | 0.01 | 0.01 | 0.01 | 0.00 | 0.00 | 0.00 | 0.00 | 0.00 | 0.00 | 0.00 | 0.00 | 0.00 |
| 2666.40  | 0.04 | 0.04 | 0.04 | 0.03 | 0.03 | 0.03 | 0.03 | 0.02 | 0.02 | 0.02 | 0.01 | 0.01 | 0.01 | 0.01 | 0.01 | 0.00 | 0.00 | 0.00 | 0.00 | 0.00 | 0.00 | 0.00 | 0.00 | 0.00 |
| 3333.00  | 0.04 | 0.04 | 0.04 | 0.04 | 0.03 | 0.03 | 0.03 | 0.02 | 0.02 | 0.02 | 0.01 | 0.01 | 0.01 | 0.01 | 0.01 | 0.00 | 0.00 | 0.00 | 0.00 | 0.00 | 0.00 | 0.00 | 0.00 | 0.00 |
| 3999.60  | 0.04 | 0.04 | 0.04 | 0.04 | 0.04 | 0.03 | 0.03 | 0.02 | 0.02 | 0.02 | 0.01 | 0.01 | 0.01 | 0.01 | 0.01 | 0.00 | 0.00 | 0.00 | 0.00 | 0.00 | 0.00 | 0.00 | 0.00 | 0.00 |
| 4666.20  | 0.04 | 0.04 | 0.04 | 0.04 | 0.04 | 0.03 | 0.03 | 0.02 | 0.02 | 0.02 | 0.01 | 0.01 | 0.01 | 0.01 | 0.01 | 0.01 | 0.00 | 0.00 | 0.00 | 0.00 | 0.00 | 0.00 | 0.00 | 0.00 |
| 5332.80  | 0.04 | 0.04 | 0.04 | 0.04 | 0.04 | 0.04 | 0.03 | 0.03 | 0.02 | 0.02 | 0.02 | 0.01 | 0.01 | 0.01 | 0.01 | 0.01 | 0.00 | 0.00 | 0.00 | 0.00 | 0.00 | 0.00 | 0.00 | 0.00 |
| 5999.40  | 0.04 | 0.04 | 0.04 | 0.05 | 0.06 | 0.05 | 0.04 | 0.03 | 0.02 | 0.02 | 0.02 | 0.01 | 0.01 | 0.01 | 0.01 | 0.01 | 0.00 | 0.00 | 0.00 | 0.00 | 0.00 | 0.00 | 0.00 | 0.00 |
| 6666.00  | 0.04 | 0.04 | 0.06 | 0.09 | 0.08 | 0.07 | 0.05 | 0.04 | 0.03 | 0.02 | 0.02 | 0.01 | 0.01 | 0.01 | 0.01 | 0.01 | 0.00 | 0.00 | 0.00 | 0.00 | 0.00 | 0.00 | 0.00 | 0.00 |
| 7332.60  | 0.04 | 0.04 | 0.10 | 0.12 | 0.10 | 0.09 | 0.07 | 0.05 | 0.04 | 0.03 | 0.02 | 0.01 | 0.01 | 0.01 | 0.01 | 0.01 | 0.00 | 0.00 | 0.00 | 0.00 | 0.00 | 0.00 | 0.00 | 0.00 |
| 7999.20  | 0.04 | 0.04 | 0.14 | 0.13 | 0.13 | 0.11 | 0.09 | 0.06 | 0.04 | 0.03 | 0.02 | 0.02 | 0.01 | 0.01 | 0.01 | 0.01 | 0.00 | 0.00 | 0.00 | 0.00 | 0.00 | 0.00 | 0.00 | 0.00 |
| 8665.80  | 0.04 | 0.04 | 0.16 | 0.14 | 0.17 | 0.13 | 0.10 | 0.08 | 0.05 | 0.04 | 0.03 | 0.02 | 0.01 | 0.01 | 0.01 | 0.01 | 0.00 | 0.00 | 0.00 | 0.00 | 0.00 | 0.00 | 0.00 | 0.00 |
| 9332.40  | 0.04 | 0.05 | 0.15 | 0.17 | 0.19 | 0.15 | 0.12 | 0.09 | 0.07 | 0.05 | 0.03 | 0.02 | 0.02 | 0.01 | 0.01 | 0.01 | 0.00 | 0.00 | 0.00 | 0.00 | 0.00 | 0.00 | 0.00 | 0.00 |
| 9999.00  | 0.04 | 0.08 | 0.15 | 0.21 | 0.20 | 0.18 | 0.14 | 0.11 | 0.08 | 0.06 | 0.04 | 0.03 | 0.02 | 0.01 | 0.01 | 0.01 | 0.00 | 0.00 | 0.00 | 0.00 | 0.00 | 0.00 | 0.00 | 0.00 |
| 10665.60 | 0.04 | 0.13 | 0.15 | 0.26 | 0.20 | 0.20 | 0.16 | 0.12 | 0.09 | 0.07 | 0.05 | 0.03 | 0.02 | 0.02 | 0.01 | 0.01 | 0.01 | 0.00 | 0.00 | 0.00 | 0.00 | 0.00 | 0.00 | 0.00 |
| 11332.20 | 0.04 | 0.16 | 0.16 | 0.29 | 0.22 | 0.22 | 0.18 | 0.14 | 0.11 | 0.08 | 0.06 | 0.04 | 0.03 | 0.02 | 0.01 | 0.01 | 0.01 | 0.00 | 0.00 | 0.00 | 0.00 | 0.00 | 0.00 | 0.00 |
| 11998.80 | 0.05 | 0.17 | 0.17 | 0.30 | 0.25 | 0.23 | 0.20 | 0.15 | 0.12 | 0.09 | 0.06 | 0.04 | 0.03 | 0.02 | 0.02 | 0.01 | 0.01 | 0.01 | 0.00 | 0.00 | 0.00 | 0.00 | 0.00 | 0.00 |
| 12665.40 | 0.05 | 0.16 | 0.18 | 0.29 | 0.30 | 0.23 | 0.22 | 0.17 | 0.13 | 0.10 | 0.07 | 0.05 | 0.04 | 0.03 | 0.02 | 0.01 | 0.01 | 0.01 | 0.00 | 0.00 | 0.00 | 0.00 | 0.00 | 0.00 |
| 13332.00 | 0.06 | 0.16 | 0.20 | 0.27 | 0.33 | 0.24 | 0.23 | 0.19 | 0.15 | 0.11 | 0.08 | 0.06 | 0.05 | 0.03 | 0.02 | 0.02 | 0.01 | 0.01 | 0.01 | 0.00 | 0.00 | 0.00 | 0.00 | 0.00 |
| 13998.60 | 0.07 | 0.17 | 0.24 | 0.26 | 0.35 | 0.27 | 0.23 | 0.21 | 0.16 | 0.12 | 0.09 | 0.07 | 0.05 | 0.04 | 0.03 | 0.02 | 0.01 | 0.01 | 0.01 | 0.01 | 0.00 | 0.00 | 0.00 | 0.00 |
| 14665.20 | 0.08 | 0.18 | 0.29 | 0.26 | 0.35 | 0.31 | 0.24 | 0.22 | 0.18 | 0.13 | 0.10 | 0.07 | 0.06 | 0.04 | 0.03 | 0.02 | 0.02 | 0.01 | 0.01 | 0.01 | 0.01 | 0.00 | 0.00 | 0.00 |

**Table S10.** Rotational population as a function of the hexapole voltage (HV) as a function of the hexapole voltage (HV) of Sa 2-chloroethanol in 0.5 m hexapole

| HV       | M=0  | M=1  | M=2  | M=3  | M=4  | M=5  | M=6  | M=7  | M=8  | M=9  | M=10 | M=11 | M=12 | M=13 | M=14 | M=15 | M=16 | M=17 | M=18 | M=19 | M=20 | M=21 | M=22 | M=23 |
|----------|------|------|------|------|------|------|------|------|------|------|------|------|------|------|------|------|------|------|------|------|------|------|------|------|
| 0.00     | 0.04 | 0.04 | 0.04 | 0.04 | 0.03 | 0.03 | 0.03 | 0.02 | 0.02 | 0.02 | 0.01 | 0.01 | 0.01 | 0.01 | 0.01 | 0.00 | 0.00 | 0.00 | 0.00 | 0.00 | 0.00 | 0.00 | 0.00 | 0.00 |
| 666.60   | 0.04 | 0.04 | 0.04 | 0.04 | 0.04 | 0.03 | 0.03 | 0.03 | 0.02 | 0.02 | 0.01 | 0.01 | 0.01 | 0.01 | 0.01 | 0.00 | 0.00 | 0.00 | 0.00 | 0.00 | 0.00 | 0.00 | 0.00 | 0.00 |
| 1333.20  | 0.04 | 0.04 | 0.05 | 0.05 | 0.04 | 0.04 | 0.04 | 0.03 | 0.03 | 0.02 | 0.02 | 0.01 | 0.01 | 0.01 | 0.01 | 0.00 | 0.00 | 0.00 | 0.00 | 0.00 | 0.00 | 0.00 | 0.00 | 0.00 |
| 1999.80  | 0.04 | 0.04 | 0.05 | 0.05 | 0.05 | 0.05 | 0.04 | 0.04 | 0.03 | 0.03 | 0.02 | 0.02 | 0.01 | 0.01 | 0.01 | 0.01 | 0.00 | 0.00 | 0.00 | 0.00 | 0.00 | 0.00 | 0.00 | 0.00 |
| 2666.40  | 0.04 | 0.05 | 0.06 | 0.08 | 0.10 | 0.10 | 0.09 | 0.08 | 0.07 | 0.05 | 0.04 | 0.03 | 0.02 | 0.01 | 0.01 | 0.01 | 0.00 | 0.00 | 0.00 | 0.00 | 0.00 | 0.00 | 0.00 | 0.00 |
| 3333.00  | 0.04 | 0.05 | 0.15 | 0.17 | 0.19 | 0.21 | 0.20 | 0.17 | 0.14 | 0.10 | 0.08 | 0.05 | 0.04 | 0.03 | 0.02 | 0.01 | 0.01 | 0.00 | 0.00 | 0.00 | 0.00 | 0.00 | 0.00 | 0.00 |
| 3999.60  | 0.04 | 0.05 | 0.17 | 0.25 | 0.33 | 0.31 | 0.31 | 0.25 | 0.20 | 0.16 | 0.12 | 0.09 | 0.06 | 0.04 | 0.03 | 0.02 | 0.01 | 0.01 | 0.01 | 0.00 | 0.00 | 0.00 | 0.00 | 0.00 |
| 4666.20  | 0.04 | 0.06 | 0.21 | 0.40 | 0.38 | 0.44 | 0.38 | 0.32 | 0.28 | 0.21 | 0.17 | 0.13 | 0.09 | 0.07 | 0.05 | 0.03 | 0.02 | 0.01 | 0.01 | 0.01 | 0.00 | 0.00 | 0.00 | 0.00 |
| 5332.80  | 0.04 | 0.11 | 0.24 | 0.47 | 0.49 | 0.47 | 0.47 | 0.40 | 0.34 | 0.27 | 0.22 | 0.17 | 0.12 | 0.09 | 0.06 | 0.05 | 0.03 | 0.03 | 0.02 | 0.02 | 0.01 | 0.01 | 0.01 | 0.00 |
| 5999.40  | 0.04 | 0.17 | 0.31 | 0.47 | 0.60 | 0.52 | 0.51 | 0.47 | 0.38 | 0.32 | 0.26 | 0.20 | 0.14 | 0.11 | 0.09 | 0.07 | 0.06 | 0.05 | 0.04 | 0.03 | 0.02 | 0.01 | 0.01 | 0.00 |
| 6666.00  | 0.04 | 0.22 | 0.42 | 0.52 | 0.60 | 0.57 | 0.56 | 0.51 | 0.45 | 0.35 | 0.28 | 0.23 | 0.17 | 0.14 | 0.12 | 0.10 | 0.09 | 0.07 | 0.05 | 0.03 | 0.02 | 0.01 | 0.01 | 0.00 |
| 7332.60  | 0.04 | 0.24 | 0.50 | 0.63 | 0.61 | 0.62 | 0.60 | 0.55 | 0.48 | 0.37 | 0.29 | 0.25 | 0.21 | 0.18 | 0.15 | 0.12 | 0.10 | 0.07 | 0.05 | 0.03 | 0.02 | 0.01 | 0.01 | 0.00 |
| 7999.20  | 0.04 | 0.24 | 0.54 | 0.70 | 0.63 | 0.67 | 0.63 | 0.58 | 0.48 | 0.39 | 0.32 | 0.28 | 0.25 | 0.22 | 0.17 | 0.13 | 0.09 | 0.07 | 0.04 | 0.03 | 0.02 | 0.01 | 0.01 | 0.00 |
| 8665.80  | 0.04 | 0.25 | 0.55 | 0.71 | 0.67 | 0.70 | 0.67 | 0.58 | 0.50 | 0.41 | 0.36 | 0.32 | 0.28 | 0.23 | 0.17 | 0.12 | 0.09 | 0.06 | 0.04 | 0.03 | 0.02 | 0.01 | 0.01 | 0.00 |
| 9332.40  | 0.04 | 0.26 | 0.57 | 0.72 | 0.72 | 0.73 | 0.69 | 0.60 | 0.51 | 0.44 | 0.40 | 0.35 | 0.28 | 0.23 | 0.17 | 0.12 | 0.08 | 0.06 | 0.04 | 0.03 | 0.02 | 0.01 | 0.01 | 0.00 |
| 9999.00  | 0.04 | 0.29 | 0.60 | 0.74 | 0.77 | 0.73 | 0.70 | 0.61 | 0.52 | 0.47 | 0.43 | 0.37 | 0.28 | 0.23 | 0.16 | 0.11 | 0.08 | 0.06 | 0.04 | 0.03 | 0.02 | 0.01 | 0.01 | 0.00 |
| 10665.60 | 0.04 | 0.31 | 0.67 | 0.76 | 0.82 | 0.75 | 0.72 | 0.64 | 0.55 | 0.51 | 0.45 | 0.37 | 0.28 | 0.22 | 0.15 | 0.11 | 0.08 | 0.06 | 0.04 | 0.03 | 0.02 | 0.01 | 0.01 | 0.00 |
| 11332.20 | 0.04 | 0.35 | 0.73 | 0.79 | 0.84 | 0.77 | 0.74 | 0.67 | 0.59 | 0.54 | 0.46 | 0.37 | 0.28 | 0.22 | 0.15 | 0.10 | 0.08 | 0.06 | 0.04 | 0.03 | 0.02 | 0.01 | 0.01 | 0.00 |
| 11998.80 | 0.04 | 0.38 | 0.78 | 0.83 | 0.85 | 0.80 | 0.77 | 0.71 | 0.63 | 0.56 | 0.46 | 0.37 | 0.28 | 0.21 | 0.15 | 0.10 | 0.08 | 0.06 | 0.04 | 0.03 | 0.02 | 0.01 | 0.01 | 0.00 |
| 12665.40 | 0.04 | 0.42 | 0.79 | 0.85 | 0.85 | 0.83 | 0.79 | 0.75 | 0.66 | 0.57 | 0.46 | 0.37 | 0.27 | 0.21 | 0.15 | 0.10 | 0.08 | 0.06 | 0.04 | 0.03 | 0.02 | 0.01 | 0.01 | 0.00 |
| 13332.00 | 0.05 | 0.46 | 0.81 | 0.88 | 0.85 | 0.86 | 0.83 | 0.80 | 0.69 | 0.57 | 0.46 | 0.37 | 0.27 | 0.21 | 0.15 | 0.10 | 0.08 | 0.06 | 0.04 | 0.03 | 0.02 | 0.01 | 0.01 | 0.00 |
| 13998.60 | 0.06 | 0.49 | 0.82 | 0.92 | 0.87 | 0.89 | 0.87 | 0.85 | 0.70 | 0.58 | 0.47 | 0.37 | 0.27 | 0.21 | 0.15 | 0.10 | 0.08 | 0.06 | 0.04 | 0.03 | 0.02 | 0.01 | 0.01 | 0.00 |
| 14665.20 | 0.08 | 0.52 | 0.84 | 0.96 | 0.89 | 0.93 | 0.91 | 0.89 | 0.72 | 0.58 | 0.47 | 0.37 | 0.27 | 0.21 | 0.15 | 0.10 | 0.08 | 0.06 | 0.04 | 0.03 | 0.02 | 0.01 | 0.01 | 0.00 |



**Table S11.** Rotational population as a function of the hexapole voltage (HV) of Ss+ 2-chloroethanol in 0.5 m hexapole.

| HV       | M=0  | M=1  | M=2  | M=3  | M=4  | M=5  | M=6  | M=7  | M=8  | M=9  | M=10 | M=11 | M=12 | M=13 | M=14 | M=15 | M=16 | M=17 | M=18 | M=19 | M=20 | M=21 | M=22 | M=23 |
|----------|------|------|------|------|------|------|------|------|------|------|------|------|------|------|------|------|------|------|------|------|------|------|------|------|
| 0.00     | 0.04 | 0.04 | 0.04 | 0.04 | 0.03 | 0.03 | 0.03 | 0.02 | 0.02 | 0.02 | 0.01 | 0.01 | 0.01 | 0.01 | 0.00 | 0.00 | 0.00 | 0.00 | 0.00 | 0.00 | 0.00 | 0.00 | 0.00 | 0.00 |
| 666.60   | 0.04 | 0.04 | 0.04 | 0.04 | 0.03 | 0.03 | 0.03 | 0.02 | 0.02 | 0.02 | 0.01 | 0.01 | 0.01 | 0.01 | 0.00 | 0.00 | 0.00 | 0.00 | 0.00 | 0.00 | 0.00 | 0.00 | 0.00 | 0.00 |
| 1333.20  | 0.04 | 0.04 | 0.04 | 0.04 | 0.03 | 0.03 | 0.03 | 0.02 | 0.02 | 0.02 | 0.01 | 0.01 | 0.01 | 0.01 | 0.00 | 0.00 | 0.00 | 0.00 | 0.00 | 0.00 | 0.00 | 0.00 | 0.00 | 0.00 |
| 1999.80  | 0.04 | 0.04 | 0.04 | 0.04 | 0.03 | 0.03 | 0.03 | 0.02 | 0.02 | 0.02 | 0.01 | 0.01 | 0.01 | 0.01 | 0.00 | 0.00 | 0.00 | 0.00 | 0.00 | 0.00 | 0.00 | 0.00 | 0.00 | 0.00 |
| 2666.40  | 0.04 | 0.04 | 0.04 | 0.04 | 0.03 | 0.03 | 0.03 | 0.02 | 0.02 | 0.02 | 0.01 | 0.01 | 0.01 | 0.01 | 0.00 | 0.00 | 0.00 | 0.00 | 0.00 | 0.00 | 0.00 | 0.00 | 0.00 | 0.00 |
| 3333.00  | 0.04 | 0.04 | 0.04 | 0.04 | 0.03 | 0.03 | 0.03 | 0.02 | 0.02 | 0.02 | 0.01 | 0.01 | 0.01 | 0.01 | 0.00 | 0.00 | 0.00 | 0.00 | 0.00 | 0.00 | 0.00 | 0.00 | 0.00 | 0.00 |
| 3999.60  | 0.04 | 0.04 | 0.04 | 0.04 | 0.03 | 0.03 | 0.03 | 0.02 | 0.02 | 0.02 | 0.01 | 0.01 | 0.01 | 0.01 | 0.00 | 0.00 | 0.00 | 0.00 | 0.00 | 0.00 | 0.00 | 0.00 | 0.00 | 0.00 |
| 4666.20  | 0.04 | 0.04 | 0.04 | 0.04 | 0.03 | 0.03 | 0.03 | 0.02 | 0.02 | 0.02 | 0.01 | 0.01 | 0.01 | 0.01 | 0.00 | 0.00 | 0.00 | 0.00 | 0.00 | 0.00 | 0.00 | 0.00 | 0.00 | 0.00 |
| 5332.80  | 0.04 | 0.04 | 0.04 | 0.04 | 0.03 | 0.03 | 0.03 | 0.02 | 0.02 | 0.02 | 0.01 | 0.01 | 0.01 | 0.01 | 0.00 | 0.00 | 0.00 | 0.00 | 0.00 | 0.00 | 0.00 | 0.00 | 0.00 | 0.00 |
| 5999.40  | 0.04 | 0.04 | 0.04 | 0.04 | 0.03 | 0.03 | 0.03 | 0.02 | 0.02 | 0.02 | 0.01 | 0.01 | 0.01 | 0.01 | 0.00 | 0.00 | 0.00 | 0.00 | 0.00 | 0.00 | 0.00 | 0.00 | 0.00 | 0.00 |
| 6666.00  | 0.04 | 0.04 | 0.04 | 0.04 | 0.03 | 0.03 | 0.03 | 0.02 | 0.02 | 0.02 | 0.01 | 0.01 | 0.01 | 0.01 | 0.00 | 0.00 | 0.00 | 0.00 | 0.00 | 0.00 | 0.00 | 0.00 | 0.00 | 0.00 |
| 7332.60  | 0.04 | 0.04 | 0.04 | 0.04 | 0.03 | 0.03 | 0.03 | 0.02 | 0.02 | 0.02 | 0.01 | 0.01 | 0.01 | 0.01 | 0.00 | 0.00 | 0.00 | 0.00 | 0.00 | 0.00 | 0.00 | 0.00 | 0.00 | 0.00 |
| 7999.20  | 0.04 | 0.04 | 0.04 | 0.04 | 0.03 | 0.03 | 0.03 | 0.02 | 0.02 | 0.02 | 0.01 | 0.01 | 0.01 | 0.01 | 0.00 | 0.00 | 0.00 | 0.00 | 0.00 | 0.00 | 0.00 | 0.00 | 0.00 | 0.00 |
| 8665.80  | 0.04 | 0.04 | 0.04 | 0.04 | 0.03 | 0.03 | 0.03 | 0.02 | 0.02 | 0.02 | 0.01 | 0.01 | 0.01 | 0.01 | 0.00 | 0.00 | 0.00 | 0.00 | 0.00 | 0.00 | 0.00 | 0.00 | 0.00 | 0.00 |
| 9332.40  | 0.04 | 0.04 | 0.04 | 0.04 | 0.03 | 0.03 | 0.03 | 0.02 | 0.02 | 0.02 | 0.01 | 0.01 | 0.01 | 0.01 | 0.00 | 0.00 | 0.00 | 0.00 | 0.00 | 0.00 | 0.00 | 0.00 | 0.00 | 0.00 |
| 9999.00  | 0.04 | 0.04 | 0.04 | 0.04 | 0.03 | 0.03 | 0.03 | 0.02 | 0.02 | 0.02 | 0.01 | 0.01 | 0.01 | 0.01 | 0.00 | 0.00 | 0.00 | 0.00 | 0.00 | 0.00 | 0.00 | 0.00 | 0.00 | 0.00 |
| 10665.60 | 0.04 | 0.04 | 0.04 | 0.04 | 0.03 | 0.03 | 0.03 | 0.02 | 0.02 | 0.02 | 0.01 | 0.01 | 0.01 | 0.01 | 0.00 | 0.00 | 0.00 | 0.00 | 0.00 | 0.00 | 0.00 | 0.00 | 0.00 | 0.00 |
| 11332.20 | 0.04 | 0.04 | 0.04 | 0.04 | 0.03 | 0.03 | 0.03 | 0.02 | 0.02 | 0.02 | 0.01 | 0.01 | 0.01 | 0.01 | 0.00 | 0.00 | 0.00 | 0.00 | 0.00 | 0.00 | 0.00 | 0.00 | 0.00 | 0.00 |
| 11998.80 | 0.04 | 0.04 | 0.05 | 0.04 | 0.03 | 0.03 | 0.03 | 0.02 | 0.02 | 0.02 | 0.01 | 0.01 | 0.01 | 0.01 | 0.01 | 0.00 | 0.00 | 0.00 | 0.00 | 0.00 | 0.00 | 0.00 | 0.00 | 0.00 |
| 12665.40 | 0.04 | 0.05 | 0.05 | 0.05 | 0.04 | 0.03 | 0.03 | 0.02 | 0.02 | 0.02 | 0.01 | 0.01 | 0.01 | 0.01 | 0.01 | 0.00 | 0.00 | 0.00 | 0.00 | 0.00 | 0.00 | 0.00 | 0.00 | 0.00 |
| 13332.00 | 0.04 | 0.05 | 0.05 | 0.05 | 0.04 | 0.03 | 0.03 | 0.02 | 0.02 | 0.02 | 0.01 | 0.01 | 0.01 | 0.01 | 0.01 | 0.00 | 0.00 | 0.00 | 0.00 | 0.01 | 0.00 | 0.00 | 0.00 | 0.00 |
| 13998.60 | 0.05 | 0.06 | 0.06 | 0.06 | 0.04 | 0.03 | 0.03 | 0.02 | 0.02 | 0.02 | 0.01 | 0.01 | 0.01 | 0.01 | 0.01 | 0.00 | 0.01 | 0.01 | 0.01 | 0.01 | 0.01 | 0.01 | 0.01 | 0.00 |
| 14665.20 | 0.05 | 0.06 | 0.06 | 0.06 | 0.04 | 0.03 | 0.03 | 0.02 | 0.02 | 0.02 | 0.01 | 0.01 | 0.01 | 0.01 | 0.01 | 0.01 | 0.01 | 0.01 | 0.01 | 0.01 | 0.01 | 0.01 | 0.01 | 0.00 |

**Table S12.** Rotational population as a function of the hexapole voltage (HV) of Ss- 2-chloroethanol in 0.5 m hexapole.

| HV       | M=0  | M=1  | M=2  | M=3  | M=4  | M=5  | M=6  | M=7  | M=8  | M=9  | M=10 | M=11 | M=12 | M=13 | M=14 | M=15 | M=16 | M=17 | M=18 | M=19 | M=20 | M=21 | M=22 | M=23 |
|----------|------|------|------|------|------|------|------|------|------|------|------|------|------|------|------|------|------|------|------|------|------|------|------|------|
| 0.00     | 0.04 | 0.04 | 0.04 | 0.04 | 0.03 | 0.03 | 0.03 | 0.02 | 0.02 | 0.02 | 0.01 | 0.01 | 0.01 | 0.01 | 0.01 | 0.00 | 0.00 | 0.00 | 0.00 | 0.00 | 0.00 | 0.00 | 0.00 | 0.00 |
| 666.60   | 0.04 | 0.04 | 0.04 | 0.04 | 0.03 | 0.03 | 0.03 | 0.02 | 0.02 | 0.02 | 0.01 | 0.01 | 0.01 | 0.01 | 0.01 | 0.00 | 0.00 | 0.00 | 0.00 | 0.00 | 0.00 | 0.00 | 0.00 | 0.00 |
| 1333.20  | 0.04 | 0.04 | 0.04 | 0.04 | 0.04 | 0.04 | 0.03 | 0.03 | 0.02 | 0.02 | 0.02 | 0.01 | 0.01 | 0.01 | 0.01 | 0.00 | 0.00 | 0.00 | 0.00 | 0.00 | 0.00 | 0.00 | 0.00 | 0.00 |
| 1999.80  | 0.04 | 0.04 | 0.04 | 0.04 | 0.04 | 0.04 | 0.03 | 0.03 | 0.03 | 0.02 | 0.02 | 0.01 | 0.01 | 0.01 | 0.01 | 0.01 | 0.00 | 0.00 | 0.00 | 0.00 | 0.00 | 0.00 | 0.00 | 0.00 |
| 2666.40  | 0.04 | 0.04 | 0.05 | 0.05 | 0.05 | 0.04 | 0.04 | 0.03 | 0.03 | 0.02 | 0.02 | 0.01 | 0.01 | 0.01 | 0.01 | 0.01 | 0.00 | 0.00 | 0.00 | 0.00 | 0.00 | 0.00 | 0.00 | 0.00 |
| 3333.00  | 0.04 | 0.04 | 0.05 | 0.05 | 0.05 | 0.05 | 0.04 | 0.04 | 0.03 | 0.03 | 0.02 | 0.02 | 0.01 | 0.01 | 0.01 | 0.01 | 0.00 | 0.00 | 0.00 | 0.00 | 0.00 | 0.00 | 0.00 | 0.00 |
| 3999.60  | 0.04 | 0.05 | 0.05 | 0.06 | 0.07 | 0.07 | 0.07 | 0.05 | 0.05 | 0.04 | 0.03 | 0.02 | 0.02 | 0.01 | 0.01 | 0.01 | 0.01 | 0.01 | 0.01 | 0.01 | 0.01 | 0.00 | 0.00 | 0.00 |
| 4666.20  | 0.04 | 0.05 | 0.07 | 0.13 | 0.14 | 0.14 | 0.12 | 0.11 | 0.09 | 0.07 | 0.05 | 0.04 | 0.03 | 0.02 | 0.02 | 0.02 | 0.02 | 0.02 | 0.02 | 0.02 | 0.02 | 0.01 | 0.01 | 0.00 |
| 5332.80  | 0.04 | 0.05 | 0.15 | 0.17 | 0.20 | 0.21 | 0.19 | 0.18 | 0.14 | 0.11 | 0.08 | 0.06 | 0.04 | 0.04 | 0.05 | 0.05 | 0.05 | 0.04 | 0.03 | 0.02 | 0.01 | 0.01 | 0.01 | 0.00 |
| 5999.40  | 0.04 | 0.05 | 0.17 | 0.21 | 0.29 | 0.27 | 0.27 | 0.25 | 0.19 | 0.14 | 0.11 | 0.09 | 0.09 | 0.09 | 0.09 | 0.07 | 0.05 | 0.04 | 0.03 | 0.02 | 0.01 | 0.01 | 0.00 | 0.00 |
| 6666.00  | 0.04 | 0.05 | 0.18 | 0.29 | 0.35 | 0.35 | 0.34 | 0.31 | 0.23 | 0.18 | 0.16 | 0.15 | 0.15 | 0.13 | 0.10 | 0.07 | 0.05 | 0.03 | 0.02 | 0.01 | 0.01 | 0.01 | 0.01 | 0.00 |
| 7332.60  | 0.04 | 0.06 | 0.22 | 0.37 | 0.38 | 0.44 | 0.40 | 0.36 | 0.28 | 0.25 | 0.23 | 0.22 | 0.19 | 0.15 | 0.10 | 0.07 | 0.05 | 0.03 | 0.02 | 0.02 | 0.01 | 0.01 | 0.01 | 0.00 |
| 7999.20  | 0.05 | 0.08 | 0.26 | 0.43 | 0.44 | 0.49 | 0.47 | 0.40 | 0.35 | 0.33 | 0.30 | 0.27 | 0.22 | 0.17 | 0.10 | 0.07 | 0.05 | 0.03 | 0.03 | 0.02 | 0.01 | 0.01 | 0.01 | 0.00 |
| 8665.80  | 0.06 | 0.13 | 0.30 | 0.47 | 0.55 | 0.53 | 0.53 | 0.46 | 0.41 | 0.41 | 0.35 | 0.31 | 0.24 | 0.18 | 0.11 | 0.08 | 0.06 | 0.04 | 0.03 | 0.02 | 0.02 | 0.01 | 0.01 | 0.00 |
| 9332.40  | 0.09 | 0.21 | 0.36 | 0.50 | 0.65 | 0.59 | 0.57 | 0.52 | 0.48 | 0.46 | 0.38 | 0.32 | 0.25 | 0.18 | 0.12 | 0.09 | 0.06 | 0.04 | 0.03 | 0.02 | 0.02 | 0.01 | 0.01 | 0.00 |
| 9999.00  | 0.14 | 0.31 | 0.44 | 0.57 | 0.71 | 0.64 | 0.60 | 0.59 | 0.53 | 0.49 | 0.39 | 0.32 | 0.25 | 0.19 | 0.13 | 0.10 | 0.07 | 0.05 | 0.04 | 0.03 | 0.02 | 0.01 | 0.01 | 0.00 |
| 10665.60 | 0.18 | 0.38 | 0.52 | 0.66 | 0.74 | 0.68 | 0.64 | 0.64 | 0.58 | 0.50 | 0.41 | 0.33 | 0.25 | 0.19 | 0.14 | 0.10 | 0.07 | 0.05 | 0.04 | 0.03 | 0.02 | 0.01 | 0.01 | 0.00 |
| 11332.20 | 0.20 | 0.40 | 0.58 | 0.75 | 0.76 | 0.71 | 0.68 | 0.68 | 0.62 | 0.51 | 0.42 | 0.33 | 0.25 | 0.19 | 0.14 | 0.10 | 0.08 | 0.06 | 0.04 | 0.03 | 0.02 | 0.01 | 0.01 | 0.00 |
| 11998.80 | 0.20 | 0.39 | 0.62 | 0.81 | 0.77 | 0.73 | 0.73 | 0.72 | 0.64 | 0.52 | 0.43 | 0.33 | 0.26 | 0.20 | 0.14 | 0.10 | 0.08 | 0.06 | 0.04 | 0.03 | 0.02 | 0.01 | 0.01 | 0.00 |
| 12665.40 | 0.20 | 0.38 | 0.64 | 0.84 | 0.77 | 0.75 | 0.77 | 0.76 | 0.65 | 0.53 | 0.44 | 0.33 | 0.26 | 0.20 | 0.15 | 0.11 | 0.08 | 0.06 | 0.04 | 0.03 | 0.02 | 0.01 | 0.01 | 0.00 |
| 13332.00 | 0.19 | 0.38 | 0.66 | 0.84 | 0.77 | 0.78 | 0.82 | 0.79 | 0.65 | 0.53 | 0.45 | 0.34 | 0.26 | 0.21 | 0.15 | 0.11 | 0.09 | 0.06 | 0.05 | 0.03 | 0.02 | 0.01 | 0.01 | 0.01 |
| 13998.60 | 0.20 | 0.40 | 0.69 | 0.84 | 0.77 | 0.80 | 0.86 | 0.81 | 0.66 | 0.54 | 0.45 | 0.34 | 0.26 | 0.21 | 0.15 | 0.11 | 0.09 | 0.07 | 0.05 | 0.03 | 0.02 | 0.02 | 0.01 | 0.01 |
| 14665.20 | 0.20 | 0.42 | 0.73 | 0.85 | 0.78 | 0.83 | 0.90 | 0.82 | 0.66 | 0.54 | 0.45 | 0.34 | 0.27 | 0.21 | 0.16 | 0.12 | 0.09 | 0.07 | 0.05 | 0.03 | 0.02 | 0.02 | 0.01 | 0.01 |

**Table S13.** Rotational population as a function of the hexapole voltage (HV) of Aa 2-chloroethanol in 1 m hexapole.

| HV       | M=0  | M=1  | M=2  | M=3  | M=4  | M=5  | M=6  | M=7  | M=8  | M=9  | M=10 | M=11 | M=12 | M=13 | M=14 | M=15 | M=16 | M=17 | M=18 | M=19 | M=20 | M=21 | M=22 | M=23 |
|----------|------|------|------|------|------|------|------|------|------|------|------|------|------|------|------|------|------|------|------|------|------|------|------|------|
| 0.00     | 0.03 | 0.03 | 0.03 | 0.03 | 0.03 | 0.02 | 0.02 | 0.02 | 0.02 | 0.01 | 0.01 | 0.01 | 0.01 | 0.01 | 0.01 | 0.00 | 0.00 | 0.00 | 0.00 | 0.00 | 0.00 | 0.00 | 0.00 | 0.00 |
| 666.60   | 0.03 | 0.03 | 0.03 | 0.03 | 0.02 | 0.02 | 0.02 | 0.02 | 0.01 | 0.01 | 0.01 | 0.01 | 0.01 | 0.01 | 0.00 | 0.00 | 0.00 | 0.00 | 0.00 | 0.00 | 0.00 | 0.00 | 0.00 | 0.00 |
| 1333.20  | 0.03 | 0.03 | 0.03 | 0.05 | 0.05 | 0.04 | 0.03 | 0.02 | 0.02 | 0.01 | 0.01 | 0.01 | 0.01 | 0.01 | 0.00 | 0.00 | 0.00 | 0.00 | 0.00 | 0.00 | 0.00 | 0.00 | 0.00 | 0.00 |
| 1999.80  | 0.03 | 0.04 | 0.11 | 0.13 | 0.14 | 0.12 | 0.09 | 0.07 | 0.05 | 0.04 | 0.02 | 0.02 | 0.01 | 0.01 | 0.01 | 0.00 | 0.00 | 0.00 | 0.00 | 0.00 | 0.00 | 0.00 | 0.00 | 0.00 |
| 2666.40  | 0.03 | 0.11 | 0.13 | 0.21 | 0.25 | 0.17 | 0.17 | 0.13 | 0.10 | 0.08 | 0.05 | 0.04 | 0.03 | 0.02 | 0.01 | 0.01 | 0.01 | 0.00 | 0.00 | 0.00 | 0.00 | 0.00 | 0.00 | 0.00 |
| 3333.00  | 0.03 | 0.14 | 0.24 | 0.25 | 0.24 | 0.29 | 0.21 | 0.17 | 0.15 | 0.12 | 0.09 | 0.07 | 0.06 | 0.04 | 0.03 | 0.02 | 0.01 | 0.01 | 0.01 | 0.00 | 0.00 | 0.00 | 0.00 | 0.00 |
| 3999.60  | 0.03 | 0.14 | 0.29 | 0.30 | 0.33 | 0.30 | 0.27 | 0.22 | 0.17 | 0.15 | 0.13 | 0.10 | 0.08 | 0.06 | 0.04 | 0.03 | 0.02 | 0.02 | 0.01 | 0.01 | 0.01 | 0.00 | 0.00 | 0.00 |
| 4666.20  | 0.03 | 0.15 | 0.27 | 0.29 | 0.33 | 0.34 | 0.28 | 0.26 | 0.21 | 0.17 | 0.15 | 0.13 | 0.11 | 0.08 | 0.06 | 0.05 | 0.04 | 0.02 | 0.02 | 0.01 | 0.01 | 0.01 | 0.00 | 0.00 |
| 5332.80  | 0.04 | 0.17 | 0.35 | 0.38 | 0.36 | 0.34 | 0.31 | 0.27 | 0.25 | 0.20 | 0.16 | 0.14 | 0.12 | 0.10 | 0.08 | 0.06 | 0.04 | 0.03 | 0.02 | 0.02 | 0.01 | 0.01 | 0.00 | 0.00 |
| 5999.40  | 0.05 | 0.23 | 0.34 | 0.40 | 0.40 | 0.36 | 0.30 | 0.29 | 0.25 | 0.22 | 0.17 | 0.14 | 0.12 | 0.10 | 0.08 | 0.07 | 0.05 | 0.04 | 0.03 | 0.02 | 0.01 | 0.01 | 0.01 | 0.00 |
| 6666.00  | 0.08 | 0.29 | 0.35 | 0.43 | 0.41 | 0.37 | 0.33 | 0.29 | 0.26 | 0.22 | 0.19 | 0.14 | 0.12 | 0.10 | 0.08 | 0.07 | 0.06 | 0.04 | 0.03 | 0.02 | 0.01 | 0.01 | 0.01 | 0.00 |
| 7332.60  | 0.09 | 0.29 | 0.44 | 0.47 | 0.45 | 0.38 | 0.33 | 0.30 | 0.26 | 0.22 | 0.19 | 0.15 | 0.12 | 0.10 | 0.08 | 0.07 | 0.05 | 0.04 | 0.03 | 0.02 | 0.02 | 0.01 | 0.01 | 0.00 |
| 7999.20  | 0.10 | 0.28 | 0.46 | 0.50 | 0.48 | 0.40 | 0.35 | 0.31 | 0.26 | 0.23 | 0.19 | 0.16 | 0.13 | 0.10 | 0.08 | 0.07 | 0.05 | 0.04 | 0.03 | 0.02 | 0.02 | 0.01 | 0.01 | 0.00 |
| 8665.80  | 0.11 | 0.29 | 0.45 | 0.53 | 0.48 | 0.42 | 0.36 | 0.32 | 0.27 | 0.23 | 0.20 | 0.17 | 0.13 | 0.10 | 0.08 | 0.06 | 0.05 | 0.04 | 0.03 | 0.02 | 0.02 | 0.01 | 0.01 | 0.00 |
| 9332.40  | 0.12 | 0.34 | 0.47 | 0.57 | 0.48 | 0.45 | 0.36 | 0.35 | 0.27 | 0.24 | 0.21 | 0.17 | 0.13 | 0.10 | 0.08 | 0.06 | 0.04 | 0.03 | 0.03 | 0.02 | 0.01 | 0.01 | 0.01 | 0.00 |
| 9999.00  | 0.13 | 0.41 | 0.50 | 0.61 | 0.49 | 0.47 | 0.38 | 0.36 | 0.29 | 0.25 | 0.22 | 0.18 | 0.13 | 0.10 | 0.07 | 0.05 | 0.04 | 0.03 | 0.03 | 0.02 | 0.01 | 0.01 | 0.01 | 0.00 |
| 10665.60 | 0.14 | 0.44 | 0.52 | 0.61 | 0.52 | 0.47 | 0.42 | 0.38 | 0.30 | 0.26 | 0.22 | 0.18 | 0.13 | 0.10 | 0.07 | 0.06 | 0.04 | 0.03 | 0.03 | 0.02 | 0.01 | 0.01 | 0.01 | 0.00 |
| 11332.20 | 0.16 | 0.45 | 0.54 | 0.59 | 0.56 | 0.48 | 0.45 | 0.41 | 0.31 | 0.27 | 0.22 | 0.17 | 0.12 | 0.09 | 0.07 | 0.06 | 0.04 | 0.03 | 0.02 | 0.02 | 0.01 | 0.01 | 0.01 | 0.00 |
| 11998.80 | 0.17 | 0.44 | 0.57 | 0.58 | 0.61 | 0.51 | 0.47 | 0.44 | 0.32 | 0.27 | 0.23 | 0.17 | 0.12 | 0.09 | 0.08 | 0.06 | 0.04 | 0.03 | 0.02 | 0.02 | 0.01 | 0.01 | 0.00 | 0.00 |
| 12665.40 | 0.18 | 0.46 | 0.60 | 0.60 | 0.62 | 0.55 | 0.49 | 0.47 | 0.33 | 0.27 | 0.23 | 0.17 | 0.12 | 0.10 | 0.08 | 0.06 | 0.04 | 0.03 | 0.02 | 0.01 | 0.01 | 0.01 | 0.00 | 0.00 |
| 13332.00 | 0.20 | 0.50 | 0.64 | 0.61 | 0.61 | 0.60 | 0.51 | 0.47 | 0.35 | 0.27 | 0.23 | 0.18 | 0.13 | 0.11 | 0.08 | 0.07 | 0.04 | 0.03 | 0.02 | 0.01 | 0.01 | 0.01 | 0.00 | 0.00 |
| 13998.60 | 0.22 | 0.54 | 0.69 | 0.65 | 0.61 | 0.64 | 0.54 | 0.48 | 0.36 | 0.29 | 0.24 | 0.18 | 0.14 | 0.11 | 0.09 | 0.07 | 0.05 | 0.03 | 0.03 | 0.01 | 0.01 | 0.01 | 0.00 | 0.00 |
| 14665.20 | 0.24 | 0.57 | 0.73 | 0.70 | 0.62 | 0.66 | 0.56 | 0.49 | 0.38 | 0.30 | 0.24 | 0.19 | 0.16 | 0.12 | 0.09 | 0.07 | 0.05 | 0.03 | 0.03 | 0.01 | 0.01 | 0.01 | 0.00 | 0.00 |

**Table S14.** Rotational population as a function of the hexapole voltage (HV) of As 2-chloroethanol in 1 m hexapole.

| HV       | M=0  | M=1  | M=2  | M=3  | M=4  | M=5  | M=6  | M=7  | M=8  | M=9  | M=10 | M=11 | M=12 | M=13 | M=14 | M=15 | M=16 | M=17 | M=18 | M=19 | M=20 | M=21 | M=22 | M=23 |
|----------|------|------|------|------|------|------|------|------|------|------|------|------|------|------|------|------|------|------|------|------|------|------|------|------|
| 0.00     | 0.04 | 0.03 | 0.03 | 0.03 | 0.03 | 0.03 | 0.02 | 0.02 | 0.02 | 0.01 | 0.01 | 0.01 | 0.01 | 0.01 | 0.01 | 0.00 | 0.00 | 0.00 | 0.00 | 0.00 | 0.00 | 0.00 | 0.00 | 0.00 |
| 666.60   | 0.04 | 0.03 | 0.03 | 0.03 | 0.02 | 0.02 | 0.02 | 0.02 | 0.01 | 0.01 | 0.01 | 0.01 | 0.01 | 0.01 | 0.00 | 0.00 | 0.00 | 0.00 | 0.00 | 0.00 | 0.00 | 0.00 | 0.00 | 0.00 |
| 1333.20  | 0.04 | 0.03 | 0.03 | 0.03 | 0.02 | 0.02 | 0.02 | 0.02 | 0.01 | 0.01 | 0.01 | 0.01 | 0.01 | 0.01 | 0.00 | 0.00 | 0.00 | 0.00 | 0.00 | 0.00 | 0.00 | 0.00 | 0.00 | 0.00 |
| 1999.80  | 0.04 | 0.03 | 0.03 | 0.03 | 0.03 | 0.02 | 0.02 | 0.02 | 0.01 | 0.01 | 0.01 | 0.01 | 0.01 | 0.01 | 0.00 | 0.00 | 0.00 | 0.00 | 0.00 | 0.00 | 0.00 | 0.00 | 0.00 | 0.00 |
| 2666.40  | 0.04 | 0.03 | 0.05 | 0.08 | 0.07 | 0.06 | 0.04 | 0.03 | 0.02 | 0.02 | 0.01 | 0.01 | 0.01 | 0.01 | 0.00 | 0.00 | 0.00 | 0.00 | 0.00 | 0.00 | 0.00 | 0.00 | 0.00 | 0.00 |
| 3333.00  | 0.04 | 0.03 | 0.11 | 0.10 | 0.13 | 0.10 | 0.08 | 0.06 | 0.04 | 0.03 | 0.02 | 0.01 | 0.01 | 0.01 | 0.01 | 0.00 | 0.00 | 0.00 | 0.00 | 0.00 | 0.00 | 0.00 | 0.00 | 0.00 |
| 3999.60  | 0.04 | 0.08 | 0.12 | 0.19 | 0.15 | 0.15 | 0.11 | 0.09 | 0.06 | 0.05 | 0.03 | 0.02 | 0.02 | 0.01 | 0.01 | 0.01 | 0.00 | 0.00 | 0.00 | 0.00 | 0.00 | 0.00 | 0.00 | 0.00 |
| 4666.20  | 0.04 | 0.12 | 0.12 | 0.23 | 0.21 | 0.17 | 0.17 | 0.11 | 0.10 | 0.07 | 0.05 | 0.04 | 0.03 | 0.02 | 0.01 | 0.01 | 0.01 | 0.00 | 0.00 | 0.00 | 0.00 | 0.00 | 0.00 | 0.00 |
| 5332.80  | 0.05 | 0.11 | 0.17 | 0.19 | 0.28 | 0.21 | 0.17 | 0.16 | 0.12 | 0.09 | 0.07 | 0.05 | 0.04 | 0.03 | 0.02 | 0.01 | 0.01 | 0.01 | 0.01 | 0.00 | 0.00 | 0.00 | 0.00 | 0.00 |
| 5999.40  | 0.07 | 0.16 | 0.28 | 0.23 | 0.23 | 0.28 | 0.20 | 0.17 | 0.16 | 0.11 | 0.09 | 0.07 | 0.05 | 0.04 | 0.03 | 0.02 | 0.02 | 0.01 | 0.01 | 0.01 | 0.00 | 0.00 | 0.00 | 0.00 |
| 6666.00  | 0.08 | 0.19 | 0.33 | 0.33 | 0.26 | 0.27 | 0.25 | 0.19 | 0.17 | 0.14 | 0.11 | 0.08 | 0.07 | 0.05 | 0.04 | 0.03 | 0.02 | 0.02 | 0.01 | 0.01 | 0.01 | 0.00 | 0.00 | 0.00 |
| 7332.60  | 0.09 | 0.19 | 0.31 | 0.34 | 0.32 | 0.28 | 0.28 | 0.23 | 0.18 | 0.15 | 0.14 | 0.11 | 0.08 | 0.07 | 0.05 | 0.04 | 0.03 | 0.02 | 0.02 | 0.01 | 0.01 | 0.01 | 0.00 | 0.00 |
| 7999.20  | 0.10 | 0.21 | 0.30 | 0.32 | 0.32 | 0.31 | 0.28 | 0.26 | 0.20 | 0.17 | 0.16 | 0.14 | 0.10 | 0.08 | 0.06 | 0.05 | 0.04 | 0.03 | 0.02 | 0.02 | 0.01 | 0.01 | 0.01 | 0.00 |
| 8665.80  | 0.12 | 0.23 | 0.33 | 0.34 | 0.33 | 0.32 | 0.29 | 0.27 | 0.23 | 0.19 | 0.17 | 0.16 | 0.13 | 0.10 | 0.08 | 0.06 | 0.05 | 0.04 | 0.03 | 0.02 | 0.01 | 0.01 | 0.01 | 0.00 |
| 9332.40  | 0.13 | 0.25 | 0.39 | 0.40 | 0.37 | 0.33 | 0.31 | 0.28 | 0.26 | 0.21 | 0.18 | 0.17 | 0.14 | 0.12 | 0.09 | 0.07 | 0.06 | 0.05 | 0.03 | 0.02 | 0.02 | 0.01 | 0.01 | 0.00 |
| 9999.00  | 0.15 | 0.27 | 0.44 | 0.43 | 0.41 | 0.34 | 0.33 | 0.29 | 0.27 | 0.24 | 0.21 | 0.19 | 0.15 | 0.13 | 0.11 | 0.08 | 0.07 | 0.05 | 0.04 | 0.03 | 0.02 | 0.01 | 0.01 | 0.00 |
| 10665.60 | 0.16 | 0.32 | 0.44 | 0.43 | 0.43 | 0.37 | 0.33 | 0.31 | 0.29 | 0.26 | 0.23 | 0.20 | 0.17 | 0.14 | 0.12 | 0.09 | 0.07 | 0.06 | 0.04 | 0.03 | 0.02 | 0.02 | 0.01 | 0.01 |
| 11332.20 | 0.17 | 0.37 | 0.44 | 0.46 | 0.45 | 0.39 | 0.35 | 0.32 | 0.30 | 0.28 | 0.26 | 0.21 | 0.18 | 0.15 | 0.13 | 0.10 | 0.08 | 0.06 | 0.05 | 0.03 | 0.02 | 0.02 | 0.01 | 0.01 |
| 11998.80 | 0.19 | 0.40 | 0.45 | 0.50 | 0.45 | 0.40 | 0.37 | 0.34 | 0.32 | 0.30 | 0.27 | 0.23 | 0.19 | 0.16 | 0.13 | 0.11 | 0.09 | 0.07 | 0.05 | 0.03 | 0.02 | 0.02 | 0.01 | 0.01 |
| 12665.40 | 0.20 | 0.42 | 0.50 | 0.53 | 0.47 | 0.41 | 0.39 | 0.36 | 0.33 | 0.32 | 0.28 | 0.23 | 0.20 | 0.16 | 0.13 | 0.11 | 0.09 | 0.07 | 0.05 | 0.04 | 0.03 | 0.02 | 0.01 | 0.01 |
| 13332.00 | 0.20 | 0.42 | 0.55 | 0.55 | 0.49 | 0.43 | 0.41 | 0.38 | 0.34 | 0.34 | 0.29 | 0.24 | 0.20 | 0.16 | 0.13 | 0.11 | 0.09 | 0.07 | 0.06 | 0.04 | 0.03 | 0.02 | 0.01 | 0.01 |
| 13998.60 | 0.21 | 0.43 | 0.59 | 0.58 | 0.53 | 0.45 | 0.43 | 0.40 | 0.35 | 0.35 | 0.30 | 0.25 | 0.20 | 0.17 | 0.13 | 0.11 | 0.09 | 0.07 | 0.06 | 0.04 | 0.03 | 0.02 | 0.01 | 0.01 |
| 14665.20 | 0.22 | 0.43 | 0.59 | 0.60 | 0.55 | 0.46 | 0.45 | 0.41 | 0.37 | 0.35 | 0.30 | 0.25 | 0.21 | 0.17 | 0.13 | 0.11 | 0.09 | 0.07 | 0.06 | 0.04 | 0.03 | 0.02 | 0.01 | 0.01 |

**Table S15.** Rotational population as a function of the hexapole voltage (HV) of Sa 2-chloroethanol in 1 m hexapole.

| HV       | M=0  | M=1  | M=2  | M=3  | M=4  | M=5  | M=6  | M=7  | M=8  | M=9  | M=10 | M=11 | M=12 | M=13 | M=14 | M=15 | M=16 | M=17 | M=18 | M=19 | M=20 | M=21 | M=22 | M=23 |
|----------|------|------|------|------|------|------|------|------|------|------|------|------|------|------|------|------|------|------|------|------|------|------|------|------|
| 0.00     | 0.04 | 0.04 | 0.04 | 0.04 | 0.03 | 0.03 | 0.03 | 0.02 | 0.02 | 0.02 | 0.01 | 0.01 | 0.01 | 0.01 | 0.01 | 0.00 | 0.00 | 0.00 | 0.00 | 0.00 | 0.00 | 0.00 | 0.00 | 0.00 |
| 666.60   | 0.04 | 0.03 | 0.03 | 0.03 | 0.03 | 0.03 | 0.03 | 0.02 | 0.02 | 0.01 | 0.01 | 0.01 | 0.01 | 0.01 | 0.00 | 0.00 | 0.00 | 0.00 | 0.00 | 0.00 | 0.00 | 0.00 | 0.00 | 0.00 |
| 1333.20  | 0.04 | 0.03 | 0.12 | 0.13 | 0.17 | 0.18 | 0.16 | 0.14 | 0.11 | 0.09 | 0.06 | 0.04 | 0.03 | 0.02 | 0.01 | 0.01 | 0.01 | 0.00 | 0.00 | 0.00 | 0.00 | 0.00 | 0.00 | 0.00 |
| 1999.80  | 0.04 | 0.07 | 0.18 | 0.35 | 0.35 | 0.36 | 0.36 | 0.30 | 0.26 | 0.20 | 0.16 | 0.12 | 0.09 | 0.06 | 0.05 | 0.03 | 0.02 | 0.02 | 0.01 | 0.01 | 0.01 | 0.01 | 0.01 | 0.00 |
| 2666.40  | 0.04 | 0.18 | 0.34 | 0.43 | 0.46 | 0.45 | 0.44 | 0.40 | 0.35 | 0.27 | 0.22 | 0.18 | 0.14 | 0.11 | 0.10 | 0.08 | 0.07 | 0.05 | 0.04 | 0.02 | 0.02 | 0.01 | 0.01 | 0.00 |
| 3333.00  | 0.04 | 0.19 | 0.41 | 0.52 | 0.51 | 0.53 | 0.48 | 0.42 | 0.36 | 0.29 | 0.25 | 0.23 | 0.20 | 0.16 | 0.13 | 0.09 | 0.07 | 0.05 | 0.03 | 0.02 | 0.02 | 0.01 | 0.01 | 0.00 |
| 3999.60  | 0.04 | 0.22 | 0.49 | 0.57 | 0.63 | 0.54 | 0.50 | 0.46 | 0.37 | 0.33 | 0.31 | 0.26 | 0.20 | 0.16 | 0.11 | 0.08 | 0.06 | 0.04 | 0.03 | 0.02 | 0.02 | 0.01 | 0.01 | 0.00 |
| 4666.20  | 0.04 | 0.29 | 0.58 | 0.63 | 0.68 | 0.58 | 0.55 | 0.51 | 0.43 | 0.39 | 0.33 | 0.26 | 0.19 | 0.15 | 0.10 | 0.07 | 0.05 | 0.04 | 0.03 | 0.02 | 0.02 | 0.01 | 0.01 | 0.00 |
| 5332.80  | 0.05 | 0.37 | 0.63 | 0.71 | 0.68 | 0.68 | 0.61 | 0.58 | 0.49 | 0.40 | 0.34 | 0.25 | 0.19 | 0.14 | 0.10 | 0.07 | 0.05 | 0.04 | 0.03 | 0.02 | 0.01 | 0.01 | 0.01 | 0.00 |
| 5999.40  | 0.08 | 0.42 | 0.68 | 0.77 | 0.76 | 0.73 | 0.67 | 0.64 | 0.50 | 0.41 | 0.34 | 0.25 | 0.18 | 0.14 | 0.10 | 0.07 | 0.06 | 0.04 | 0.03 | 0.02 | 0.01 | 0.01 | 0.01 | 0.00 |
| 6666.00  | 0.12 | 0.46 | 0.70 | 0.78 | 0.78 | 0.77 | 0.75 | 0.65 | 0.51 | 0.43 | 0.35 | 0.26 | 0.19 | 0.15 | 0.11 | 0.08 | 0.06 | 0.04 | 0.03 | 0.02 | 0.01 | 0.01 | 0.01 | 0.00 |
| 7332.60  | 0.15 | 0.54 | 0.76 | 0.88 | 0.82 | 0.84 | 0.78 | 0.65 | 0.53 | 0.45 | 0.37 | 0.28 | 0.22 | 0.16 | 0.13 | 0.09 | 0.06 | 0.05 | 0.03 | 0.02 | 0.01 | 0.01 | 0.01 | 0.00 |
| 7999.20  | 0.18 | 0.63 | 0.80 | 0.90 | 0.84 | 0.90 | 0.80 | 0.65 | 0.55 | 0.48 | 0.39 | 0.31 | 0.24 | 0.17 | 0.14 | 0.10 | 0.07 | 0.05 | 0.03 | 0.02 | 0.01 | 0.01 | 0.01 | 0.00 |
| 8665.80  | 0.22 | 0.70 | 0.81 | 0.88 | 0.89 | 0.91 | 0.81 | 0.67 | 0.57 | 0.51 | 0.40 | 0.33 | 0.25 | 0.18 | 0.15 | 0.11 | 0.07 | 0.05 | 0.04 | 0.03 | 0.02 | 0.01 | 0.01 | 0.00 |
| 9332.40  | 0.25 | 0.73 | 0.86 | 0.85 | 0.94 | 0.92 | 0.81 | 0.69 | 0.59 | 0.53 | 0.40 | 0.34 | 0.26 | 0.18 | 0.15 | 0.11 | 0.08 | 0.06 | 0.04 | 0.03 | 0.02 | 0.02 | 0.01 | 0.01 |
| 9999.00  | 0.29 | 0.76 | 0.89 | 0.85 | 0.97 | 0.93 | 0.82 | 0.72 | 0.63 | 0.54 | 0.41 | 0.35 | 0.26 | 0.19 | 0.15 | 0.12 | 0.09 | 0.07 | 0.05 | 0.03 | 0.02 | 0.02 | 0.01 | 0.00 |
| 10665.60 | 0.32 | 0.80 | 0.94 | 0.87 | 0.98 | 0.94 | 0.83 | 0.72 | 0.67 | 0.53 | 0.42 | 0.35 | 0.27 | 0.19 | 0.16 | 0.13 | 0.10 | 0.07 | 0.05 | 0.03 | 0.02 | 0.01 | 0.01 | 0.00 |
| 11332.20 | 0.34 | 0.84 | 1.03 | 0.93 | 0.98 | 0.94 | 0.85 | 0.72 | 0.71 | 0.53 | 0.41 | 0.35 | 0.27 | 0.20 | 0.17 | 0.13 | 0.10 | 0.07 | 0.05 | 0.03 | 0.02 | 0.01 | 0.01 | 0.00 |
| 11998.80 | 0.36 | 0.88 | 1.11 | 0.98 | 1.01 | 0.94 | 0.85 | 0.72 | 0.72 | 0.52 | 0.42 | 0.35 | 0.28 | 0.21 | 0.17 | 0.14 | 0.10 | 0.07 | 0.05 | 0.03 | 0.02 | 0.01 | 0.01 | 0.00 |
| 12665.40 | 0.38 | 0.88 | 1.16 | 1.04 | 1.04 | 0.96 | 0.86 | 0.73 | 0.72 | 0.52 | 0.42 | 0.35 | 0.29 | 0.22 | 0.17 | 0.14 | 0.11 | 0.07 | 0.05 | 0.03 | 0.02 | 0.01 | 0.01 | 0.00 |
| 13332.00 | 0.41 | 0.90 | 1.20 | 1.05 | 1.08 | 0.97 | 0.87 | 0.73 | 0.70 | 0.52 | 0.42 | 0.36 | 0.29 | 0.23 | 0.17 | 0.13 | 0.10 | 0.07 | 0.05 | 0.03 | 0.02 | 0.01 | 0.01 | 0.00 |
| 13998.60 | 0.44 | 0.92 | 1.21 | 1.04 | 1.08 | 0.99 | 0.86 | 0.73 | 0.69 | 0.50 | 0.43 | 0.36 | 0.30 | 0.23 | 0.17 | 0.13 | 0.10 | 0.06 | 0.05 | 0.03 | 0.02 | 0.01 | 0.01 | 0.01 |
| 14665.20 | 0.47 | 0.95 | 1.20 | 1.04 | 1.07 | 0.97 | 0.85 | 0.72 | 0.67 | 0.50 | 0.43 | 0.37 | 0.30 | 0.23 | 0.17 | 0.12 | 0.10 | 0.06 | 0.05 | 0.03 | 0.02 | 0.01 | 0.01 | 0.00 |

**Table S16.** Rotational population as a function of the hexapole voltage (HV) of Ss+ 2-chloroethanol in 1 m hexapole.

| HV       | M=0  | M=1  | M=2  | M=3  | M=4  | M=5  | M=6  | M=7  | M=8  | M=9  | M=10 | M=11 | M=12 | M=13 | M=14 | M=15 | M=16 | M=17 | M=18 | M=19 | M=20 | M=21 | M=22 | M=23 |
|----------|------|------|------|------|------|------|------|------|------|------|------|------|------|------|------|------|------|------|------|------|------|------|------|------|
| 0.00     | 0.04 | 0.04 | 0.04 | 0.04 | 0.03 | 0.03 | 0.03 | 0.02 | 0.02 | 0.02 | 0.01 | 0.01 | 0.01 | 0.01 | 0.00 | 0.00 | 0.00 | 0.00 | 0.00 | 0.00 | 0.00 | 0.00 | 0.00 | 0.00 |
| 666.60   | 0.04 | 0.04 | 0.04 | 0.04 | 0.03 | 0.03 | 0.03 | 0.02 | 0.02 | 0.02 | 0.01 | 0.01 | 0.01 | 0.01 | 0.00 | 0.00 | 0.00 | 0.00 | 0.00 | 0.00 | 0.00 | 0.00 | 0.00 | 0.00 |
| 1333.20  | 0.04 | 0.04 | 0.04 | 0.04 | 0.03 | 0.03 | 0.03 | 0.02 | 0.02 | 0.02 | 0.01 | 0.01 | 0.01 | 0.01 | 0.00 | 0.00 | 0.00 | 0.00 | 0.00 | 0.00 | 0.00 | 0.00 | 0.00 | 0.00 |
| 1999.80  | 0.04 | 0.04 | 0.04 | 0.04 | 0.03 | 0.03 | 0.03 | 0.02 | 0.02 | 0.02 | 0.01 | 0.01 | 0.01 | 0.01 | 0.00 | 0.00 | 0.00 | 0.00 | 0.00 | 0.00 | 0.00 | 0.00 | 0.00 | 0.00 |
| 2666.40  | 0.04 | 0.04 | 0.04 | 0.04 | 0.03 | 0.03 | 0.03 | 0.02 | 0.02 | 0.02 | 0.01 | 0.01 | 0.01 | 0.01 | 0.00 | 0.00 | 0.00 | 0.00 | 0.00 | 0.00 | 0.00 | 0.00 | 0.00 | 0.00 |
| 3333.00  | 0.04 | 0.04 | 0.04 | 0.04 | 0.03 | 0.03 | 0.03 | 0.02 | 0.02 | 0.02 | 0.01 | 0.01 | 0.01 | 0.01 | 0.00 | 0.00 | 0.00 | 0.00 | 0.00 | 0.00 | 0.00 | 0.00 | 0.00 | 0.00 |
| 3999.60  | 0.04 | 0.04 | 0.04 | 0.04 | 0.03 | 0.03 | 0.03 | 0.02 | 0.02 | 0.02 | 0.01 | 0.01 | 0.01 | 0.01 | 0.00 | 0.00 | 0.00 | 0.00 | 0.00 | 0.00 | 0.00 | 0.00 | 0.00 | 0.00 |
| 4666.20  | 0.04 | 0.04 | 0.04 | 0.04 | 0.03 | 0.03 | 0.03 | 0.02 | 0.02 | 0.02 | 0.01 | 0.01 | 0.01 | 0.01 | 0.00 | 0.00 | 0.00 | 0.00 | 0.00 | 0.00 | 0.00 | 0.00 | 0.00 | 0.00 |
| 5332.80  | 0.04 | 0.05 | 0.05 | 0.05 | 0.04 | 0.03 | 0.03 | 0.02 | 0.02 | 0.02 | 0.01 | 0.01 | 0.01 | 0.01 | 0.00 | 0.00 | 0.00 | 0.00 | 0.01 | 0.01 | 0.01 | 0.01 | 0.00 | 0.00 |
| 5999.40  | 0.06 | 0.06 | 0.06 | 0.06 | 0.04 | 0.03 | 0.03 | 0.02 | 0.02 | 0.02 | 0.01 | 0.01 | 0.01 | 0.01 | 0.01 | 0.01 | 0.02 | 0.02 | 0.02 | 0.02 | 0.01 | 0.01 | 0.01 | 0.00 |
| 6666.00  | 0.12 | 0.12 | 0.10 | 0.08 | 0.05 | 0.04 | 0.03 | 0.02 | 0.02 | 0.02 | 0.01 | 0.01 | 0.01 | 0.01 | 0.02 | 0.03 | 0.04 | 0.03 | 0.03 | 0.02 | 0.01 | 0.01 | 0.00 | 0.00 |
| 7332.60  | 0.20 | 0.20 | 0.17 | 0.12 | 0.08 | 0.06 | 0.04 | 0.03 | 0.02 | 0.02 | 0.01 | 0.01 | 0.02 | 0.04 | 0.05 | 0.05 | 0.04 | 0.03 | 0.02 | 0.01 | 0.01 | 0.01 | 0.00 | 0.00 |
| 7999.20  | 0.22 | 0.22 | 0.22 | 0.16 | 0.10 | 0.08 | 0.06 | 0.03 | 0.02 | 0.02 | 0.02 | 0.02 | 0.04 | 0.07 | 0.07 | 0.05 | 0.04 | 0.02 | 0.01 | 0.01 | 0.01 | 0.01 | 0.00 | 0.00 |
| 8665.80  | 0.20 | 0.21 | 0.22 | 0.21 | 0.11 | 0.09 | 0.07 | 0.05 | 0.03 | 0.02 | 0.02 | 0.05 | 0.08 | 0.09 | 0.06 | 0.04 | 0.03 | 0.02 | 0.01 | 0.01 | 0.01 | 0.01 | 0.00 | 0.00 |
| 9332.40  | 0.19 | 0.20 | 0.21 | 0.23 | 0.13 | 0.10 | 0.08 | 0.07 | 0.04 | 0.03 | 0.04 | 0.08 | 0.10 | 0.08 | 0.05 | 0.03 | 0.02 | 0.01 | 0.01 | 0.01 | 0.01 | 0.01 | 0.00 | 0.00 |
| 9999.00  | 0.19 | 0.19 | 0.20 | 0.22 | 0.16 | 0.10 | 0.09 | 0.08 | 0.06 | 0.04 | 0.08 | 0.11 | 0.10 | 0.07 | 0.04 | 0.03 | 0.02 | 0.01 | 0.01 | 0.01 | 0.01 | 0.00 | 0.00 | 0.00 |
| 10665.60 | 0.19 | 0.19 | 0.20 | 0.21 | 0.19 | 0.11 | 0.09 | 0.09 | 0.08 | 0.08 | 0.11 | 0.12 | 0.09 | 0.06 | 0.04 | 0.02 | 0.02 | 0.01 | 0.01 | 0.01 | 0.01 | 0.00 | 0.00 | 0.00 |
| 11332.20 | 0.19 | 0.19 | 0.20 | 0.20 | 0.21 | 0.12 | 0.10 | 0.09 | 0.11 | 0.11 | 0.13 | 0.12 | 0.08 | 0.05 | 0.03 | 0.02 | 0.02 | 0.02 | 0.01 | 0.01 | 0.01 | 0.00 | 0.00 | 0.00 |
| 11998.80 | 0.20 | 0.20 | 0.22 | 0.20 | 0.21 | 0.13 | 0.11 | 0.09 | 0.13 | 0.14 | 0.13 | 0.11 | 0.07 | 0.04 | 0.03 | 0.02 | 0.02 | 0.02 | 0.01 | 0.01 | 0.01 | 0.00 | 0.00 | 0.00 |
| 12665.40 | 0.21 | 0.20 | 0.23 | 0.21 | 0.21 | 0.14 | 0.12 | 0.11 | 0.16 | 0.17 | 0.14 | 0.10 | 0.06 | 0.04 | 0.03 | 0.03 | 0.02 | 0.02 | 0.01 | 0.01 | 0.01 | 0.00 | 0.00 | 0.00 |
| 13332.00 | 0.22 | 0.21 | 0.25 | 0.21 | 0.20 | 0.15 | 0.13 | 0.13 | 0.18 | 0.18 | 0.14 | 0.10 | 0.06 | 0.04 | 0.03 | 0.03 | 0.02 | 0.02 | 0.01 | 0.01 | 0.01 | 0.00 | 0.00 | 0.00 |
| 13998.60 | 0.24 | 0.22 | 0.26 | 0.22 | 0.21 | 0.16 | 0.15 | 0.16 | 0.19 | 0.19 | 0.14 | 0.10 | 0.06 | 0.04 | 0.03 | 0.03 | 0.02 | 0.02 | 0.01 | 0.01 | 0.01 | 0.00 | 0.00 | 0.00 |
| 14665.20 | 0.26 | 0.24 | 0.27 | 0.23 | 0.21 | 0.18 | 0.17 | 0.18 | 0.20 | 0.20 | 0.14 | 0.10 | 0.07 | 0.05 | 0.03 | 0.03 | 0.02 | 0.02 | 0.01 | 0.01 | 0.01 | 0.00 | 0.00 | 0.00 |

**Table S17.** Rotational population as a function of the hexapole voltage (HV) of Ss- 2-chloroethanol in 1 m hexapole.

| HV       | M=0  | M=1  | M=2  | M=3  | M=4  | M=5  | M=6  | M=7  | M=8  | M=9  | M=10 | M=11 | M=12 | M=13 | M=14 | M=15 | M=16 | M=17 | M=18 | M=19 | M=20 | M=21 | M=22 | M=23 |
|----------|------|------|------|------|------|------|------|------|------|------|------|------|------|------|------|------|------|------|------|------|------|------|------|------|
| 0.00     | 0.04 | 0.04 | 0.04 | 0.04 | 0.03 | 0.03 | 0.03 | 0.02 | 0.02 | 0.02 | 0.01 | 0.01 | 0.01 | 0.01 | 0.01 | 0.00 | 0.00 | 0.00 | 0.00 | 0.00 | 0.00 | 0.00 | 0.00 | 0.00 |
| 666.60   | 0.04 | 0.04 | 0.03 | 0.03 | 0.03 | 0.02 | 0.02 | 0.02 | 0.02 | 0.01 | 0.01 | 0.01 | 0.01 | 0.01 | 0.00 | 0.00 | 0.00 | 0.00 | 0.00 | 0.00 | 0.00 | 0.00 | 0.00 | 0.00 |
| 1333.20  | 0.04 | 0.03 | 0.03 | 0.03 | 0.03 | 0.03 | 0.03 | 0.02 | 0.02 | 0.02 | 0.01 | 0.01 | 0.01 | 0.01 | 0.00 | 0.00 | 0.00 | 0.00 | 0.00 | 0.00 | 0.00 | 0.00 | 0.00 | 0.00 |
| 1999.80  | 0.04 | 0.03 | 0.10 | 0.12 | 0.13 | 0.15 | 0.14 | 0.12 | 0.10 | 0.07 | 0.05 | 0.04 | 0.03 | 0.02 | 0.03 | 0.03 | 0.03 | 0.03 | 0.02 | 0.02 | 0.01 | 0.01 | 0.01 | 0.00 |
| 2666.40  | 0.04 | 0.04 | 0.15 | 0.24 | 0.28 | 0.30 | 0.28 | 0.25 | 0.19 | 0.16 | 0.13 | 0.13 | 0.12 | 0.10 | 0.07 | 0.05 | 0.04 | 0.02 | 0.02 | 0.01 | 0.01 | 0.01 | 0.00 | 0.00 |
| 3333.00  | 0.05 | 0.09 | 0.22 | 0.36 | 0.42 | 0.40 | 0.41 | 0.35 | 0.31 | 0.29 | 0.25 | 0.22 | 0.18 | 0.13 | 0.08 | 0.06 | 0.04 | 0.03 | 0.02 | 0.02 | 0.01 | 0.01 | 0.00 | 0.00 |
| 3999.60  | 0.13 | 0.27 | 0.37 | 0.47 | 0.55 | 0.51 | 0.47 | 0.44 | 0.40 | 0.36 | 0.29 | 0.24 | 0.18 | 0.14 | 0.10 | 0.07 | 0.05 | 0.04 | 0.03 | 0.02 | 0.01 | 0.01 | 0.01 | 0.00 |
| 4666.20  | 0.14 | 0.27 | 0.46 | 0.61 | 0.59 | 0.55 | 0.51 | 0.50 | 0.45 | 0.37 | 0.32 | 0.24 | 0.18 | 0.14 | 0.10 | 0.08 | 0.06 | 0.04 | 0.03 | 0.02 | 0.02 | 0.01 | 0.01 | 0.00 |
| 5332.80  | 0.14 | 0.29 | 0.50 | 0.61 | 0.58 | 0.58 | 0.56 | 0.55 | 0.46 | 0.39 | 0.32 | 0.23 | 0.18 | 0.14 | 0.11 | 0.08 | 0.06 | 0.05 | 0.04 | 0.02 | 0.02 | 0.01 | 0.01 | 0.00 |
| 5999.40  | 0.16 | 0.33 | 0.57 | 0.63 | 0.59 | 0.62 | 0.61 | 0.55 | 0.46 | 0.39 | 0.31 | 0.23 | 0.18 | 0.14 | 0.11 | 0.08 | 0.07 | 0.05 | 0.04 | 0.03 | 0.02 | 0.01 | 0.01 | 0.00 |
| 6666.00  | 0.19 | 0.36 | 0.64 | 0.65 | 0.65 | 0.67 | 0.65 | 0.56 | 0.48 | 0.39 | 0.31 | 0.24 | 0.18 | 0.14 | 0.11 | 0.09 | 0.07 | 0.05 | 0.04 | 0.03 | 0.02 | 0.01 | 0.01 | 0.00 |
| 7332.60  | 0.21 | 0.42 | 0.67 | 0.69 | 0.73 | 0.73 | 0.67 | 0.62 | 0.49 | 0.40 | 0.32 | 0.24 | 0.19 | 0.15 | 0.12 | 0.09 | 0.07 | 0.05 | 0.04 | 0.03 | 0.02 | 0.01 | 0.01 | 0.00 |
| 7999.20  | 0.24 | 0.48 | 0.70 | 0.76 | 0.80 | 0.79 | 0.70 | 0.65 | 0.51 | 0.41 | 0.33 | 0.25 | 0.19 | 0.16 | 0.13 | 0.10 | 0.08 | 0.06 | 0.04 | 0.03 | 0.02 | 0.01 | 0.01 | 0.00 |
| 8665.80  | 0.27 | 0.54 | 0.75 | 0.82 | 0.84 | 0.86 | 0.75 | 0.66 | 0.52 | 0.42 | 0.33 | 0.26 | 0.20 | 0.17 | 0.15 | 0.11 | 0.09 | 0.06 | 0.04 | 0.03 | 0.02 | 0.01 | 0.01 | 0.00 |
| 9332.40  | 0.31 | 0.59 | 0.79 | 0.88 | 0.87 | 0.90 | 0.80 | 0.68 | 0.54 | 0.42 | 0.33 | 0.27 | 0.22 | 0.19 | 0.16 | 0.12 | 0.09 | 0.06 | 0.04 | 0.03 | 0.02 | 0.01 | 0.01 | 0.00 |
| 9999.00  | 0.34 | 0.62 | 0.81 | 0.94 | 0.90 | 0.93 | 0.82 | 0.69 | 0.54 | 0.43 | 0.34 | 0.29 | 0.24 | 0.20 | 0.17 | 0.12 | 0.09 | 0.06 | 0.04 | 0.03 | 0.02 | 0.01 | 0.01 | 0.00 |
| 10665.60 | 0.37 | 0.65 | 0.84 | 1.00 | 0.92 | 0.96 | 0.86 | 0.71 | 0.54 | 0.44 | 0.35 | 0.31 | 0.26 | 0.21 | 0.17 | 0.12 | 0.09 | 0.06 | 0.04 | 0.03 | 0.02 | 0.01 | 0.01 | 0.00 |
| 11332.20 | 0.40 | 0.70 | 0.90 | 1.04 | 0.93 | 0.99 | 0.86 | 0.72 | 0.55 | 0.45 | 0.37 | 0.34 | 0.28 | 0.22 | 0.17 | 0.12 | 0.09 | 0.06 | 0.04 | 0.03 | 0.02 | 0.01 | 0.01 | 0.00 |
| 11998.80 | 0.42 | 0.74 | 0.95 | 1.08 | 0.94 | 1.04 | 0.87 | 0.74 | 0.56 | 0.47 | 0.40 | 0.36 | 0.29 | 0.22 | 0.16 | 0.12 | 0.09 | 0.06 | 0.04 | 0.03 | 0.02 | 0.01 | 0.01 | 0.00 |
| 12665.40 | 0.46 | 0.80 | 0.98 | 1.10 | 0.97 | 1.06 | 0.88 | 0.75 | 0.58 | 0.50 | 0.42 | 0.38 | 0.30 | 0.22 | 0.16 | 0.12 | 0.09 | 0.06 | 0.04 | 0.03 | 0.02 | 0.01 | 0.01 | 0.00 |
| 13332.00 | 0.50 | 0.85 | 1.01 | 1.11 | 1.01 | 1.05 | 0.91 | 0.75 | 0.60 | 0.53 | 0.44 | 0.39 | 0.31 | 0.22 | 0.16 | 0.12 | 0.09 | 0.07 | 0.05 | 0.03 | 0.02 | 0.01 | 0.01 | 0.00 |
| 13998.60 | 0.54 | 0.89 | 1.03 | 1.12 | 1.06 | 1.04 | 0.94 | 0.77 | 0.62 | 0.56 | 0.45 | 0.40 | 0.31 | 0.22 | 0.16 | 0.12 | 0.09 | 0.07 | 0.05 | 0.03 | 0.02 | 0.01 | 0.01 | 0.00 |
| 14665.20 | 0.59 | 0.94 | 1.06 | 1.12 | 1.10 | 1.03 | 0.94 | 0.77 | 0.63 | 0.57 | 0.45 | 0.40 | 0.31 | 0.23 | 0.16 | 0.12 | 0.09 | 0.07 | 0.05 | 0.03 | 0.02 | 0.02 | 0.01 | 0.00 |

**Table S18.** Rotational population as a function of the hexapole voltage (HV) of Aa 2-chloroethanol in 2 m hexapole.

| HV       | M=0  | M=1  | M=2  | M=3  | M=4  | M=5  | M=6  | M=7  | M=8  | M=9  | M=10 | M=11 | M=12 | M=13 | M=14 | M=15 | M=16 | M=17 | M=18 | M=19 | M=20 | M=21 | M=22 | M=23 |
|----------|------|------|------|------|------|------|------|------|------|------|------|------|------|------|------|------|------|------|------|------|------|------|------|------|
| 0.00     | 0.00 | 0.00 | 0.00 | 0.00 | 0.00 | 0.00 | 0.00 | 0.00 | 0.00 | 0.00 | 0.00 | 0.00 | 0.00 | 0.00 | 0.00 | 0.00 | 0.00 | 0.00 | 0.00 | 0.00 | 0.00 | 0.00 | 0.00 | 0.00 |
| 666.60   | 0.00 | 0.00 | 0.08 | 0.11 | 0.19 | 0.19 | 0.22 | 0.20 | 0.18 | 0.15 | 0.11 | 0.08 | 0.06 | 0.05 | 0.03 | 0.02 | 0.01 | 0.01 | 0.01 | 0.00 | 0.00 | 0.00 | 0.00 | 0.00 |
| 1333.20  | 0.00 | 0.11 | 0.25 | 0.30 | 0.29 | 0.27 | 0.22 | 0.18 | 0.16 | 0.13 | 0.11 | 0.09 | 0.07 | 0.06 | 0.05 | 0.04 | 0.03 | 0.02 | 0.02 | 0.01 | 0.01 | 0.01 | 0.00 | 0.00 |
| 1999.80  | 0.00 | 0.13 | 0.35 | 0.34 | 0.33 | 0.34 | 0.39 | 0.36 | 0.31 | 0.28 | 0.27 | 0.22 | 0.17 | 0.13 | 0.11 | 0.08 | 0.05 | 0.04 | 0.03 | 0.02 | 0.01 | 0.01 | 0.00 | 0.00 |
| 2666.40  | 0.00 | 0.26 | 0.39 | 0.36 | 0.47 | 0.52 | 0.48 | 0.44 | 0.44 | 0.37 | 0.28 | 0.22 | 0.17 | 0.12 | 0.08 | 0.06 | 0.04 | 0.03 | 0.02 | 0.01 | 0.01 | 0.00 | 0.00 | 0.00 |
| 3333.00  | 0.00 | 0.30 | 0.39 | 0.47 | 0.58 | 0.57 | 0.55 | 0.51 | 0.43 | 0.34 | 0.26 | 0.20 | 0.15 | 0.11 | 0.07 | 0.05 | 0.04 | 0.02 | 0.02 | 0.01 | 0.01 | 0.00 | 0.00 | 0.00 |
| 3999.60  | 0.04 | 0.34 | 0.42 | 0.59 | 0.66 | 0.64 | 0.60 | 0.49 | 0.42 | 0.33 | 0.26 | 0.21 | 0.14 | 0.10 | 0.07 | 0.05 | 0.04 | 0.02 | 0.02 | 0.01 | 0.01 | 0.00 | 0.00 | 0.00 |
| 4666.20  | 0.06 | 0.38 | 0.52 | 0.68 | 0.71 | 0.70 | 0.58 | 0.49 | 0.44 | 0.34 | 0.27 | 0.21 | 0.15 | 0.11 | 0.07 | 0.05 | 0.04 | 0.03 | 0.02 | 0.01 | 0.01 | 0.00 | 0.00 | 0.00 |
| 5332.80  | 0.07 | 0.43 | 0.61 | 0.74 | 0.76 | 0.70 | 0.61 | 0.53 | 0.46 | 0.38 | 0.30 | 0.23 | 0.17 | 0.13 | 0.09 | 0.07 | 0.05 | 0.03 | 0.02 | 0.02 | 0.01 | 0.01 | 0.00 | 0.00 |
| 5999.40  | 0.08 | 0.43 | 0.66 | 0.73 | 0.81 | 0.67 | 0.63 | 0.57 | 0.51 | 0.43 | 0.34 | 0.26 | 0.21 | 0.16 | 0.12 | 0.09 | 0.07 | 0.05 | 0.04 | 0.03 | 0.02 | 0.01 | 0.01 | 0.00 |
| 6666.00  | 0.09 | 0.42 | 0.73 | 0.79 | 0.80 | 0.70 | 0.67 | 0.65 | 0.55 | 0.44 | 0.36 | 0.30 | 0.25 | 0.19 | 0.14 | 0.10 | 0.08 | 0.06 | 0.04 | 0.03 | 0.02 | 0.01 | 0.01 | 0.00 |
| 7332.60  | 0.10 | 0.43 | 0.80 | 0.84 | 0.78 | 0.72 | 0.75 | 0.68 | 0.56 | 0.44 | 0.38 | 0.32 | 0.26 | 0.19 | 0.14 | 0.10 | 0.08 | 0.05 | 0.04 | 0.02 | 0.02 | 0.01 | 0.01 | 0.00 |
| 7999.20  | 0.11 | 0.48 | 0.82 | 0.87 | 0.78 | 0.77 | 0.81 | 0.68 | 0.55 | 0.44 | 0.40 | 0.32 | 0.25 | 0.18 | 0.14 | 0.10 | 0.07 | 0.05 | 0.03 | 0.02 | 0.01 | 0.01 | 0.00 | 0.00 |
| 8665.80  | 0.13 | 0.51 | 0.81 | 0.87 | 0.79 | 0.84 | 0.82 | 0.66 | 0.54 | 0.47 | 0.41 | 0.31 | 0.24 | 0.18 | 0.13 | 0.09 | 0.07 | 0.05 | 0.03 | 0.02 | 0.01 | 0.01 | 0.00 | 0.00 |
| 9332.40  | 0.15 | 0.55 | 0.83 | 0.86 | 0.81 | 0.90 | 0.81 | 0.65 | 0.56 | 0.50 | 0.41 | 0.30 | 0.24 | 0.17 | 0.13 | 0.09 | 0.06 | 0.04 | 0.03 | 0.02 | 0.01 | 0.01 | 0.00 | 0.00 |
| 9999.00  | 0.18 | 0.60 | 0.87 | 0.85 | 0.85 | 0.92 | 0.80 | 0.63 | 0.58 | 0.51 | 0.40 | 0.30 | 0.23 | 0.17 | 0.12 | 0.09 | 0.06 | 0.04 | 0.03 | 0.02 | 0.01 | 0.01 | 0.00 | 0.00 |
| 10665.60 | 0.22 | 0.63 | 0.91 | 0.86 | 0.90 | 0.90 | 0.77 | 0.63 | 0.59 | 0.50 | 0.39 | 0.29 | 0.22 | 0.17 | 0.12 | 0.08 | 0.06 | 0.04 | 0.03 | 0.02 | 0.01 | 0.01 | 0.00 | 0.00 |
| 11332.20 | 0.24 | 0.66 | 0.97 | 0.87 | 0.96 | 0.91 | 0.75 | 0.66 | 0.61 | 0.50 | 0.39 | 0.29 | 0.22 | 0.17 | 0.12 | 0.08 | 0.06 | 0.04 | 0.03 | 0.02 | 0.01 | 0.01 | 0.00 | 0.00 |
| 11998.80 | 0.27 | 0.69 | 0.98 | 0.89 | 0.99 | 0.91 | 0.75 | 0.69 | 0.61 | 0.50 | 0.38 | 0.29 | 0.22 | 0.18 | 0.13 | 0.09 | 0.06 | 0.04 | 0.03 | 0.02 | 0.01 | 0.01 | 0.01 | 0.00 |
| 12665.40 | 0.29 | 0.73 | 0.98 | 0.90 | 0.99 | 0.88 | 0.74 | 0.70 | 0.61 | 0.49 | 0.38 | 0.29 | 0.23 | 0.18 | 0.13 | 0.09 | 0.07 | 0.05 | 0.03 | 0.02 | 0.02 | 0.01 | 0.01 | 0.00 |
| 13332.00 | 0.31 | 0.76 | 0.96 | 0.94 | 0.99 | 0.86 | 0.75 | 0.70 | 0.61 | 0.49 | 0.38 | 0.30 | 0.24 | 0.19 | 0.14 | 0.10 | 0.07 | 0.05 | 0.04 | 0.03 | 0.02 | 0.01 | 0.01 | 0.00 |
| 13998.60 | 0.34 | 0.78 | 0.95 | 0.97 | 1.00 | 0.84 | 0.77 | 0.70 | 0.61 | 0.49 | 0.39 | 0.32 | 0.25 | 0.19 | 0.14 | 0.11 | 0.08 | 0.06 | 0.04 | 0.03 | 0.02 | 0.01 | 0.01 | 0.00 |
| 14665.20 | 0.38 | 0.80 | 0.95 | 1.01 | 1.01 | 0.84 | 0.79 | 0.72 | 0.60 | 0.49 | 0.40 | 0.33 | 0.26 | 0.20 | 0.15 | 0.11 | 0.08 | 0.06 | 0.04 | 0.03 | 0.02 | 0.01 | 0.01 | 0.00 |



**Table S19.** Rotational population as a function of the hexapole voltage (HV) of As 2-chloroethanol in 2 m hexapole.

| HV       | M=0  | M=1  | M=2  | M=3  | M=4  | M=5  | M=6  | M=7  | M=8  | M=9  | M=10 | M=11 | M=12 | M=13 | M=14 | M=15 | M=16 | M=17 | M=18 | M=19 | M=20 | M=21 | M=22 | M=23 |
|----------|------|------|------|------|------|------|------|------|------|------|------|------|------|------|------|------|------|------|------|------|------|------|------|------|
| 0.00     | 0.00 | 0.00 | 0.00 | 0.00 | 0.00 | 0.00 | 0.00 | 0.00 | 0.00 | 0.00 | 0.00 | 0.00 | 0.00 | 0.00 | 0.00 | 0.00 | 0.00 | 0.00 | 0.00 | 0.00 | 0.00 | 0.00 | 0.00 | 0.00 |
| 666.60   | 0.00 | 0.00 | 0.00 | 0.00 | 0.00 | 0.00 | 0.00 | 0.00 | 0.00 | 0.00 | 0.00 | 0.00 | 0.00 | 0.00 | 0.00 | 0.00 | 0.00 | 0.00 | 0.00 | 0.00 | 0.00 | 0.00 | 0.00 | 0.00 |
| 1333.20  | 0.00 | 0.04 | 0.06 | 0.11 | 0.08 | 0.09 | 0.06 | 0.05 | 0.03 | 0.02 | 0.02 | 0.01 | 0.01 | 0.00 | 0.00 | 0.00 | 0.00 | 0.00 | 0.00 | 0.00 | 0.00 | 0.00 | 0.00 | 0.00 |
| 1999.80  | 0.02 | 0.09 | 0.16 | 0.13 | 0.13 | 0.17 | 0.12 | 0.10 | 0.09 | 0.07 | 0.05 | 0.04 | 0.03 | 0.02 | 0.02 | 0.01 | 0.01 | 0.00 | 0.00 | 0.00 | 0.00 | 0.00 | 0.00 | 0.00 |
| 2666.40  | 0.04 | 0.11 | 0.17 | 0.18 | 0.19 | 0.18 | 0.17 | 0.16 | 0.12 | 0.10 | 0.09 | 0.08 | 0.06 | 0.04 | 0.04 | 0.03 | 0.02 | 0.02 | 0.01 | 0.01 | 0.01 | 0.00 | 0.00 | 0.00 |
| 3333.00  | 0.06 | 0.14 | 0.25 | 0.26 | 0.24 | 0.20 | 0.19 | 0.17 | 0.16 | 0.14 | 0.12 | 0.10 | 0.09 | 0.08 | 0.06 | 0.05 | 0.04 | 0.03 | 0.02 | 0.02 | 0.01 | 0.01 | 0.01 | 0.00 |
| 3999.60  | 0.08 | 0.24 | 0.27 | 0.28 | 0.27 | 0.24 | 0.21 | 0.20 | 0.18 | 0.17 | 0.15 | 0.13 | 0.11 | 0.09 | 0.08 | 0.06 | 0.05 | 0.04 | 0.03 | 0.02 | 0.01 | 0.01 | 0.01 | 0.00 |
| 4666.20  | 0.09 | 0.25 | 0.33 | 0.32 | 0.32 | 0.26 | 0.24 | 0.22 | 0.20 | 0.19 | 0.16 | 0.14 | 0.11 | 0.09 | 0.07 | 0.06 | 0.05 | 0.04 | 0.03 | 0.02 | 0.02 | 0.01 | 0.01 | 0.00 |
| 5332.80  | 0.10 | 0.27 | 0.33 | 0.37 | 0.32 | 0.30 | 0.26 | 0.23 | 0.23 | 0.20 | 0.17 | 0.14 | 0.12 | 0.09 | 0.07 | 0.06 | 0.05 | 0.04 | 0.03 | 0.02 | 0.01 | 0.01 | 0.01 | 0.00 |
| 5999.40  | 0.12 | 0.34 | 0.38 | 0.42 | 0.36 | 0.32 | 0.28 | 0.24 | 0.25 | 0.20 | 0.17 | 0.14 | 0.12 | 0.09 | 0.07 | 0.06 | 0.04 | 0.03 | 0.02 | 0.02 | 0.01 | 0.01 | 0.01 | 0.00 |
| 6666.00  | 0.14 | 0.37 | 0.40 | 0.44 | 0.42 | 0.31 | 0.30 | 0.26 | 0.25 | 0.22 | 0.18 | 0.15 | 0.12 | 0.09 | 0.07 | 0.06 | 0.04 | 0.03 | 0.02 | 0.02 | 0.01 | 0.01 | 0.01 | 0.00 |
| 7332.60  | 0.17 | 0.37 | 0.45 | 0.44 | 0.44 | 0.35 | 0.29 | 0.29 | 0.26 | 0.22 | 0.19 | 0.15 | 0.12 | 0.09 | 0.07 | 0.06 | 0.04 | 0.03 | 0.02 | 0.01 | 0.01 | 0.01 | 0.00 | 0.00 |
| 7999.20  | 0.22 | 0.41 | 0.51 | 0.47 | 0.43 | 0.41 | 0.32 | 0.32 | 0.28 | 0.22 | 0.19 | 0.15 | 0.12 | 0.09 | 0.07 | 0.06 | 0.04 | 0.03 | 0.02 | 0.01 | 0.01 | 0.01 | 0.00 | 0.00 |
| 8665.80  | 0.26 | 0.47 | 0.58 | 0.53 | 0.44 | 0.41 | 0.35 | 0.33 | 0.28 | 0.24 | 0.19 | 0.15 | 0.12 | 0.09 | 0.08 | 0.06 | 0.04 | 0.03 | 0.02 | 0.02 | 0.01 | 0.01 | 0.00 | 0.00 |
| 9332.40  | 0.30 | 0.49 | 0.61 | 0.57 | 0.49 | 0.41 | 0.36 | 0.34 | 0.28 | 0.24 | 0.20 | 0.16 | 0.13 | 0.10 | 0.08 | 0.06 | 0.04 | 0.03 | 0.02 | 0.02 | 0.01 | 0.01 | 0.01 | 0.00 |
| 9999.00  | 0.33 | 0.49 | 0.62 | 0.56 | 0.52 | 0.43 | 0.37 | 0.35 | 0.29 | 0.25 | 0.21 | 0.17 | 0.13 | 0.10 | 0.08 | 0.07 | 0.05 | 0.03 | 0.02 | 0.02 | 0.01 | 0.01 | 0.01 | 0.00 |
| 10665.60 | 0.35 | 0.52 | 0.63 | 0.55 | 0.52 | 0.44 | 0.38 | 0.36 | 0.29 | 0.25 | 0.22 | 0.18 | 0.14 | 0.11 | 0.09 | 0.07 | 0.05 | 0.04 | 0.03 | 0.02 | 0.01 | 0.01 | 0.01 | 0.00 |
| 11332.20 | 0.37 | 0.56 | 0.64 | 0.57 | 0.51 | 0.44 | 0.41 | 0.37 | 0.30 | 0.26 | 0.22 | 0.19 | 0.15 | 0.12 | 0.09 | 0.07 | 0.05 | 0.04 | 0.03 | 0.02 | 0.02 | 0.01 | 0.01 | 0.00 |
| 11998.80 | 0.39 | 0.60 | 0.67 | 0.60 | 0.52 | 0.45 | 0.43 | 0.38 | 0.31 | 0.27 | 0.22 | 0.19 | 0.16 | 0.13 | 0.10 | 0.08 | 0.06 | 0.04 | 0.03 | 0.02 | 0.02 | 0.01 | 0.01 | 0.00 |
| 12665.40 | 0.40 | 0.62 | 0.71 | 0.65 | 0.53 | 0.47 | 0.44 | 0.38 | 0.32 | 0.28 | 0.23 | 0.20 | 0.16 | 0.14 | 0.11 | 0.08 | 0.06 | 0.05 | 0.03 | 0.03 | 0.02 | 0.01 | 0.01 | 0.00 |
| 13332.00 | 0.42 | 0.65 | 0.73 | 0.67 | 0.54 | 0.47 | 0.44 | 0.38 | 0.33 | 0.28 | 0.24 | 0.20 | 0.17 | 0.15 | 0.11 | 0.08 | 0.07 | 0.05 | 0.04 | 0.03 | 0.02 | 0.01 | 0.01 | 0.00 |
| 13998.60 | 0.44 | 0.67 | 0.73 | 0.66 | 0.56 | 0.47 | 0.45 | 0.39 | 0.34 | 0.29 | 0.25 | 0.21 | 0.17 | 0.15 | 0.12 | 0.09 | 0.07 | 0.05 | 0.04 | 0.03 | 0.02 | 0.01 | 0.01 | 0.00 |
| 14665.20 | 0.45 | 0.68 | 0.73 | 0.64 | 0.58 | 0.47 | 0.46 | 0.39 | 0.35 | 0.30 | 0.26 | 0.21 | 0.18 | 0.16 | 0.12 | 0.09 | 0.07 | 0.05 | 0.04 | 0.03 | 0.02 | 0.02 | 0.01 | 0.01 |

**Table S20.** Rotational population as a function of the hexapole voltage (HV) of Sa 2-chloroethanol in 2 m hexapole.

| HV       | M=0  | M=1  | M=2  | M=3  | M=4  | M=5  | M=6  | M=7  | M=8  | M=9  | M=10 | M=11 | M=12 | M=13 | M=14 | M=15 | M=16 | M=17 | M=18 | M=19 | M=20 | M=21 | M=22 | M=23 |
|----------|------|------|------|------|------|------|------|------|------|------|------|------|------|------|------|------|------|------|------|------|------|------|------|------|
| 0.00     | 0.00 | 0.00 | 0.00 | 0.00 | 0.00 | 0.00 | 0.00 | 0.00 | 0.00 | 0.00 | 0.00 | 0.00 | 0.00 | 0.00 | 0.00 | 0.00 | 0.00 | 0.00 | 0.00 | 0.00 | 0.00 | 0.00 | 0.00 | 0.00 |
| 666.60   | 0.00 | 0.03 | 0.09 | 0.20 | 0.20 | 0.22 | 0.21 | 0.17 | 0.16 | 0.12 | 0.09 | 0.07 | 0.05 | 0.04 | 0.03 | 0.02 | 0.01 | 0.01 | 0.01 | 0.01 | 0.01 | 0.00 | 0.00 | 0.00 |
| 1333.20  | 0.00 | 0.12 | 0.28 | 0.32 | 0.35 | 0.31 | 0.28 | 0.24 | 0.20 | 0.18 | 0.17 | 0.15 | 0.12 | 0.09 | 0.07 | 0.05 | 0.03 | 0.02 | 0.02 | 0.01 | 0.01 | 0.01 | 0.00 | 0.00 |
| 1999.80  | 0.02 | 0.25 | 0.39 | 0.46 | 0.42 | 0.38 | 0.37 | 0.33 | 0.28 | 0.23 | 0.18 | 0.13 | 0.10 | 0.07 | 0.05 | 0.04 | 0.03 | 0.02 | 0.02 | 0.01 | 0.01 | 0.00 | 0.00 | 0.00 |
| 2666.40  | 0.08 | 0.38 | 0.47 | 0.50 | 0.48 | 0.49 | 0.47 | 0.37 | 0.33 | 0.26 | 0.21 | 0.15 | 0.11 | 0.09 | 0.06 | 0.05 | 0.04 | 0.03 | 0.02 | 0.01 | 0.01 | 0.01 | 0.00 | 0.00 |
| 3333.00  | 0.14 | 0.45 | 0.49 | 0.50 | 0.57 | 0.58 | 0.50 | 0.44 | 0.37 | 0.29 | 0.23 | 0.18 | 0.13 | 0.11 | 0.09 | 0.07 | 0.06 | 0.04 | 0.03 | 0.02 | 0.01 | 0.01 | 0.01 | 0.00 |
| 3999.60  | 0.17 | 0.51 | 0.59 | 0.63 | 0.63 | 0.61 | 0.54 | 0.46 | 0.39 | 0.32 | 0.25 | 0.20 | 0.17 | 0.14 | 0.11 | 0.09 | 0.06 | 0.04 | 0.03 | 0.02 | 0.01 | 0.01 | 0.01 | 0.00 |
| 4666.20  | 0.21 | 0.53 | 0.60 | 0.63 | 0.68 | 0.64 | 0.57 | 0.47 | 0.40 | 0.33 | 0.28 | 0.24 | 0.19 | 0.15 | 0.12 | 0.08 | 0.06 | 0.04 | 0.03 | 0.02 | 0.01 | 0.01 | 0.01 | 0.00 |
| 5332.80  | 0.26 | 0.53 | 0.65 | 0.70 | 0.73 | 0.67 | 0.59 | 0.52 | 0.42 | 0.36 | 0.31 | 0.26 | 0.20 | 0.16 | 0.12 | 0.08 | 0.06 | 0.04 | 0.03 | 0.02 | 0.01 | 0.01 | 0.01 | 0.00 |
| 5999.40  | 0.29 | 0.57 | 0.70 | 0.75 | 0.77 | 0.69 | 0.63 | 0.56 | 0.46 | 0.39 | 0.33 | 0.27 | 0.21 | 0.16 | 0.11 | 0.08 | 0.06 | 0.04 | 0.03 | 0.02 | 0.02 | 0.01 | 0.01 | 0.00 |
| 6666.00  | 0.33 | 0.60 | 0.72 | 0.78 | 0.83 | 0.70 | 0.68 | 0.60 | 0.49 | 0.42 | 0.34 | 0.28 | 0.21 | 0.16 | 0.11 | 0.08 | 0.06 | 0.05 | 0.03 | 0.03 | 0.02 | 0.01 | 0.01 | 0.00 |
| 7332.60  | 0.38 | 0.64 | 0.78 | 0.85 | 0.84 | 0.74 | 0.70 | 0.64 | 0.51 | 0.42 | 0.35 | 0.27 | 0.21 | 0.16 | 0.12 | 0.09 | 0.07 | 0.05 | 0.04 | 0.03 | 0.02 | 0.01 | 0.01 | 0.00 |
| 7999.20  | 0.43 | 0.70 | 0.83 | 0.91 | 0.84 | 0.77 | 0.73 | 0.67 | 0.53 | 0.44 | 0.35 | 0.28 | 0.21 | 0.17 | 0.13 | 0.10 | 0.07 | 0.06 | 0.04 | 0.03 | 0.02 | 0.01 | 0.01 | 0.00 |
| 8665.80  | 0.48 | 0.72 | 0.86 | 0.96 | 0.83 | 0.79 | 0.76 | 0.68 | 0.54 | 0.44 | 0.36 | 0.28 | 0.23 | 0.18 | 0.14 | 0.10 | 0.08 | 0.06 | 0.04 | 0.03 | 0.02 | 0.01 | 0.01 | 0.00 |
| 9332.40  | 0.52 | 0.72 | 0.89 | 0.97 | 0.84 | 0.83 | 0.79 | 0.68 | 0.54 | 0.45 | 0.37 | 0.30 | 0.24 | 0.19 | 0.15 | 0.11 | 0.08 | 0.06 | 0.04 | 0.03 | 0.02 | 0.01 | 0.01 | 0.00 |
| 9999.00  | 0.55 | 0.77 | 0.93 | 0.98 | 0.87 | 0.87 | 0.79 | 0.68 | 0.55 | 0.46 | 0.39 | 0.32 | 0.25 | 0.20 | 0.15 | 0.11 | 0.08 | 0.06 | 0.04 | 0.03 | 0.02 | 0.01 | 0.01 | 0.00 |
| 10665.60 | 0.59 | 0.81 | 0.96 | 0.95 | 0.88 | 0.88 | 0.78 | 0.67 | 0.55 | 0.46 | 0.41 | 0.33 | 0.26 | 0.20 | 0.15 | 0.11 | 0.08 | 0.06 | 0.04 | 0.03 | 0.02 | 0.01 | 0.01 | 0.00 |
| 11332.20 | 0.62 | 0.85 | 0.99 | 0.95 | 0.92 | 0.90 | 0.79 | 0.67 | 0.56 | 0.49 | 0.42 | 0.34 | 0.26 | 0.20 | 0.15 | 0.11 | 0.08 | 0.06 | 0.04 | 0.03 | 0.02 | 0.01 | 0.01 | 0.01 |
| 11998.80 | 0.65 | 0.87 | 1.00 | 0.96 | 0.97 | 0.90 | 0.79 | 0.69 | 0.56 | 0.50 | 0.43 | 0.34 | 0.26 | 0.19 | 0.15 | 0.11 | 0.08 | 0.06 | 0.04 | 0.03 | 0.02 | 0.02 | 0.01 | 0.01 |
| 12665.40 | 0.67 | 0.90 | 1.01 | 0.95 | 1.00 | 0.90 | 0.79 | 0.70 | 0.56 | 0.51 | 0.42 | 0.33 | 0.25 | 0.19 | 0.14 | 0.11 | 0.08 | 0.06 | 0.05 | 0.03 | 0.02 | 0.02 | 0.01 | 0.00 |
| 13332.00 | 0.70 | 0.92 | 1.01 | 0.96 | 1.01 | 0.91 | 0.79 | 0.71 | 0.57 | 0.52 | 0.41 | 0.32 | 0.25 | 0.20 | 0.14 | 0.11 | 0.08 | 0.06 | 0.05 | 0.03 | 0.02 | 0.01 | 0.01 | 0.00 |
| 13998.60 | 0.72 | 0.94 | 1.02 | 0.97 | 1.00 | 0.91 | 0.81 | 0.70 | 0.58 | 0.52 | 0.40 | 0.32 | 0.25 | 0.20 | 0.14 | 0.11 | 0.08 | 0.06 | 0.05 | 0.03 | 0.02 | 0.01 | 0.01 | 0.00 |
| 14665.20 | 0.73 | 0.97 | 1.03 | 1.00 | 0.98 | 0.91 | 0.81 | 0.69 | 0.58 | 0.52 | 0.40 | 0.31 | 0.25 | 0.20 | 0.15 | 0.11 | 0.08 | 0.06 | 0.04 | 0.03 | 0.02 | 0.01 | 0.01 | 0.00 |

**Table S21.** Rotational population as a function of the hexapole voltage (HV) of Ss+ 2-chloroethanol in 2 m hexapole.

| HV       | M=0  | M=1  | M=2  | M=3  | M=4  | M=5  | M=6  | M=7  | M=8  | M=9  | M=10 | M=11 | M=12 | M=13 | M=14 | M=15 | M=16 | M=17 | M=18 | M=19 | M=20 | M=21 | M=22 | M=23 |
|----------|------|------|------|------|------|------|------|------|------|------|------|------|------|------|------|------|------|------|------|------|------|------|------|------|
| 0.00     | 0.00 | 0.00 | 0.00 | 0.00 | 0.00 | 0.00 | 0.00 | 0.00 | 0.00 | 0.00 | 0.00 | 0.00 | 0.00 | 0.00 | 0.00 | 0.00 | 0.00 | 0.00 | 0.00 | 0.00 | 0.00 | 0.00 | 0.00 | 0.00 |
| 666.60   | 0.00 | 0.00 | 0.00 | 0.00 | 0.00 | 0.00 | 0.00 | 0.00 | 0.00 | 0.00 | 0.00 | 0.00 | 0.00 | 0.00 | 0.00 | 0.00 | 0.00 | 0.00 | 0.00 | 0.00 | 0.00 | 0.00 | 0.00 | 0.00 |
| 1333.20  | 0.00 | 0.00 | 0.00 | 0.00 | 0.00 | 0.00 | 0.00 | 0.00 | 0.00 | 0.00 | 0.00 | 0.00 | 0.00 | 0.00 | 0.00 | 0.00 | 0.00 | 0.00 | 0.00 | 0.00 | 0.00 | 0.00 | 0.00 | 0.00 |
| 1999.80  | 0.01 | 0.01 | 0.01 | 0.01 | 0.00 | 0.00 | 0.00 | 0.00 | 0.00 | 0.00 | 0.00 | 0.00 | 0.00 | 0.00 | 0.00 | 0.00 | 0.01 | 0.01 | 0.01 | 0.01 | 0.01 | 0.01 | 0.00 | 0.00 |
| 2666.40  | 0.11 | 0.11 | 0.11 | 0.07 | 0.04 | 0.03 | 0.02 | 0.00 | 0.00 | 0.00 | 0.00 | 0.01 | 0.02 | 0.04 | 0.04 | 0.03 | 0.02 | 0.01 | 0.01 | 0.01 | 0.00 | 0.00 | 0.00 | 0.00 |
| 3333.00  | 0.09 | 0.09 | 0.09 | 0.11 | 0.07 | 0.04 | 0.03 | 0.04 | 0.02 | 0.02 | 0.04 | 0.06 | 0.06 | 0.04 | 0.02 | 0.01 | 0.01 | 0.01 | 0.01 | 0.01 | 0.00 | 0.00 | 0.00 | 0.00 |
| 3999.60  | 0.09 | 0.09 | 0.10 | 0.10 | 0.11 | 0.05 | 0.04 | 0.04 | 0.07 | 0.08 | 0.07 | 0.06 | 0.04 | 0.02 | 0.02 | 0.01 | 0.01 | 0.01 | 0.01 | 0.01 | 0.00 | 0.00 | 0.00 | 0.00 |
| 4666.20  | 0.11 | 0.10 | 0.12 | 0.10 | 0.10 | 0.07 | 0.07 | 0.08 | 0.10 | 0.10 | 0.07 | 0.05 | 0.03 | 0.02 | 0.02 | 0.01 | 0.01 | 0.01 | 0.01 | 0.01 | 0.00 | 0.00 | 0.00 | 0.00 |
| 5332.80  | 0.14 | 0.13 | 0.15 | 0.12 | 0.11 | 0.10 | 0.11 | 0.11 | 0.11 | 0.10 | 0.08 | 0.05 | 0.04 | 0.02 | 0.02 | 0.01 | 0.01 | 0.01 | 0.01 | 0.00 | 0.00 | 0.00 | 0.00 | 0.00 |
| 5999.40  | 0.18 | 0.17 | 0.18 | 0.14 | 0.13 | 0.13 | 0.15 | 0.13 | 0.11 | 0.11 | 0.08 | 0.06 | 0.04 | 0.03 | 0.02 | 0.02 | 0.01 | 0.01 | 0.01 | 0.00 | 0.00 | 0.00 | 0.00 | 0.00 |
| 6666.00  | 0.20 | 0.20 | 0.21 | 0.16 | 0.15 | 0.18 | 0.18 | 0.13 | 0.12 | 0.11 | 0.08 | 0.06 | 0.04 | 0.03 | 0.02 | 0.02 | 0.02 | 0.01 | 0.01 | 0.01 | 0.00 | 0.00 | 0.00 | 0.00 |
| 7332.60  | 0.23 | 0.23 | 0.23 | 0.19 | 0.18 | 0.21 | 0.19 | 0.14 | 0.13 | 0.11 | 0.09 | 0.07 | 0.05 | 0.03 | 0.03 | 0.02 | 0.02 | 0.02 | 0.01 | 0.01 | 0.01 | 0.00 | 0.00 | 0.00 |
| 7999.20  | 0.26 | 0.26 | 0.26 | 0.23 | 0.22 | 0.25 | 0.20 | 0.15 | 0.13 | 0.12 | 0.09 | 0.07 | 0.06 | 0.04 | 0.03 | 0.03 | 0.02 | 0.02 | 0.02 | 0.01 | 0.01 | 0.01 | 0.00 | 0.00 |
| 8665.80  | 0.31 | 0.30 | 0.29 | 0.28 | 0.26 | 0.26 | 0.21 | 0.16 | 0.14 | 0.13 | 0.10 | 0.08 | 0.06 | 0.04 | 0.04 | 0.04 | 0.03 | 0.03 | 0.02 | 0.02 | 0.01 | 0.01 | 0.00 | 0.00 |
| 9332.40  | 0.38 | 0.35 | 0.34 | 0.34 | 0.30 | 0.28 | 0.22 | 0.17 | 0.16 | 0.14 | 0.10 | 0.08 | 0.07 | 0.05 | 0.05 | 0.05 | 0.04 | 0.03 | 0.02 | 0.01 | 0.01 | 0.01 | 0.00 | 0.00 |
| 9999.00  | 0.44 | 0.41 | 0.40 | 0.38 | 0.34 | 0.30 | 0.24 | 0.19 | 0.17 | 0.15 | 0.11 | 0.09 | 0.07 | 0.07 | 0.07 | 0.06 | 0.05 | 0.03 | 0.02 | 0.01 | 0.01 | 0.00 | 0.00 | 0.00 |
| 10665.60 | 0.47 | 0.44 | 0.45 | 0.42 | 0.36 | 0.33 | 0.27 | 0.21 | 0.18 | 0.15 | 0.12 | 0.10 | 0.09 | 0.09 | 0.08 | 0.06 | 0.04 | 0.03 | 0.02 | 0.01 | 0.01 | 0.00 | 0.00 | 0.00 |
| 11332.20 | 0.49 | 0.46 | 0.48 | 0.46 | 0.38 | 0.35 | 0.29 | 0.23 | 0.19 | 0.16 | 0.13 | 0.12 | 0.11 | 0.10 | 0.08 | 0.06 | 0.04 | 0.03 | 0.02 | 0.01 | 0.01 | 0.01 | 0.00 | 0.00 |
| 11998.80 | 0.51 | 0.48 | 0.50 | 0.51 | 0.41 | 0.37 | 0.31 | 0.25 | 0.20 | 0.17 | 0.15 | 0.14 | 0.13 | 0.10 | 0.08 | 0.06 | 0.04 | 0.03 | 0.02 | 0.01 | 0.01 | 0.01 | 0.00 | 0.00 |
| 12665.40 | 0.53 | 0.49 | 0.52 | 0.54 | 0.44 | 0.38 | 0.32 | 0.26 | 0.21 | 0.17 | 0.16 | 0.16 | 0.14 | 0.10 | 0.07 | 0.05 | 0.04 | 0.03 | 0.02 | 0.01 | 0.01 | 0.01 | 0.00 | 0.00 |
| 13332.00 | 0.55 | 0.51 | 0.54 | 0.56 | 0.47 | 0.39 | 0.32 | 0.27 | 0.23 | 0.18 | 0.18 | 0.17 | 0.14 | 0.10 | 0.07 | 0.05 | 0.04 | 0.03 | 0.02 | 0.01 | 0.01 | 0.01 | 0.00 | 0.00 |
| 13998.60 | 0.57 | 0.53 | 0.57 | 0.57 | 0.50 | 0.41 | 0.33 | 0.29 | 0.25 | 0.20 | 0.20 | 0.18 | 0.14 | 0.09 | 0.07 | 0.05 | 0.04 | 0.03 | 0.02 | 0.01 | 0.01 | 0.01 | 0.00 | 0.00 |
| 14665.20 | 0.59 | 0.56 | 0.59 | 0.58 | 0.52 | 0.43 | 0.34 | 0.29 | 0.27 | 0.22 | 0.21 | 0.18 | 0.13 | 0.09 | 0.07 | 0.05 | 0.04 | 0.03 | 0.02 | 0.01 | 0.01 | 0.01 | 0.00 | 0.00 |

**Table S22.** Rotational population as a function of the hexapole voltage (HV) of Ss- 2-chloroethanol in 2 m hexapole.

| HV       | M=0  | M=1  | M=2  | M=3  | M=4  | M=5  | M=6  | M=7  | M=8  | M=9  | M=10 | M=11 | M=12 | M=13 | M=14 | M=15 | M=16 | M=17 | M=18 | M=19 | M=20 | M=21 | M=22 | M=23 |
|----------|------|------|------|------|------|------|------|------|------|------|------|------|------|------|------|------|------|------|------|------|------|------|------|------|
| 0.00     | 0.00 | 0.00 | 0.00 | 0.00 | 0.00 | 0.00 | 0.00 | 0.00 | 0.00 | 0.00 | 0.00 | 0.00 | 0.00 | 0.00 | 0.00 | 0.00 | 0.00 | 0.00 | 0.00 | 0.00 | 0.00 | 0.00 | 0.00 | 0.00 |
| 666.60   | 0.00 | 0.00 | 0.04 | 0.06 | 0.07 | 0.08 | 0.07 | 0.07 | 0.05 | 0.04 | 0.03 | 0.02 | 0.01 | 0.01 | 0.01 | 0.02 | 0.02 | 0.02 | 0.01 | 0.01 | 0.01 | 0.00 | 0.00 | 0.00 |
| 1333.20  | 0.06 | 0.15 | 0.21 | 0.28 | 0.33 | 0.31 | 0.27 | 0.26 | 0.24 | 0.21 | 0.17 | 0.15 | 0.11 | 0.08 | 0.06 | 0.04 | 0.03 | 0.02 | 0.02 | 0.01 | 0.01 | 0.01 | 0.00 | 0.00 |
| 1999.80  | 0.06 | 0.18 | 0.33 | 0.36 | 0.34 | 0.34 | 0.33 | 0.30 | 0.26 | 0.21 | 0.17 | 0.13 | 0.10 | 0.08 | 0.06 | 0.05 | 0.04 | 0.03 | 0.02 | 0.01 | 0.01 | 0.01 | 0.00 | 0.00 |
| 2666.40  | 0.11 | 0.27 | 0.42 | 0.42 | 0.45 | 0.42 | 0.38 | 0.34 | 0.26 | 0.21 | 0.17 | 0.12 | 0.10 | 0.08 | 0.07 | 0.06 | 0.05 | 0.04 | 0.03 | 0.02 | 0.01 | 0.01 | 0.00 | 0.00 |
| 3333.00  | 0.17 | 0.35 | 0.46 | 0.52 | 0.51 | 0.48 | 0.45 | 0.36 | 0.29 | 0.23 | 0.19 | 0.15 | 0.13 | 0.12 | 0.09 | 0.07 | 0.05 | 0.03 | 0.02 | 0.02 | 0.01 | 0.01 | 0.00 | 0.00 |
| 3999.60  | 0.20 | 0.42 | 0.53 | 0.58 | 0.51 | 0.53 | 0.48 | 0.40 | 0.32 | 0.27 | 0.23 | 0.20 | 0.17 | 0.13 | 0.09 | 0.06 | 0.05 | 0.03 | 0.02 | 0.02 | 0.01 | 0.01 | 0.01 | 0.00 |
| 4666.20  | 0.27 | 0.52 | 0.58 | 0.59 | 0.58 | 0.55 | 0.54 | 0.46 | 0.36 | 0.33 | 0.27 | 0.23 | 0.18 | 0.14 | 0.10 | 0.07 | 0.05 | 0.04 | 0.03 | 0.02 | 0.01 | 0.01 | 0.01 | 0.00 |
| 5332.80  | 0.36 | 0.63 | 0.64 | 0.63 | 0.63 | 0.61 | 0.57 | 0.48 | 0.41 | 0.35 | 0.29 | 0.24 | 0.19 | 0.14 | 0.10 | 0.08 | 0.06 | 0.04 | 0.03 | 0.03 | 0.02 | 0.01 | 0.01 | 0.00 |
| 5999.40  | 0.42 | 0.68 | 0.72 | 0.71 | 0.66 | 0.63 | 0.60 | 0.52 | 0.45 | 0.37 | 0.31 | 0.25 | 0.19 | 0.15 | 0.11 | 0.08 | 0.07 | 0.05 | 0.04 | 0.03 | 0.02 | 0.01 | 0.01 | 0.00 |
| 6666.00  | 0.46 | 0.67 | 0.75 | 0.73 | 0.69 | 0.66 | 0.63 | 0.55 | 0.46 | 0.38 | 0.32 | 0.24 | 0.20 | 0.16 | 0.12 | 0.09 | 0.07 | 0.06 | 0.04 | 0.03 | 0.02 | 0.01 | 0.01 | 0.00 |
| 7332.60  | 0.52 | 0.70 | 0.78 | 0.72 | 0.72 | 0.69 | 0.66 | 0.60 | 0.47 | 0.39 | 0.32 | 0.25 | 0.21 | 0.17 | 0.13 | 0.09 | 0.07 | 0.05 | 0.04 | 0.03 | 0.02 | 0.01 | 0.01 | 0.00 |
| 7999.20  | 0.54 | 0.71 | 0.80 | 0.75 | 0.74 | 0.71 | 0.69 | 0.63 | 0.49 | 0.40 | 0.34 | 0.27 | 0.22 | 0.17 | 0.13 | 0.09 | 0.07 | 0.05 | 0.04 | 0.03 | 0.02 | 0.01 | 0.01 | 0.00 |
| 8665.80  | 0.57 | 0.72 | 0.81 | 0.78 | 0.76 | 0.74 | 0.71 | 0.66 | 0.50 | 0.42 | 0.36 | 0.30 | 0.23 | 0.18 | 0.13 | 0.09 | 0.07 | 0.05 | 0.04 | 0.03 | 0.02 | 0.01 | 0.01 | 0.00 |
| 9332.40  | 0.59 | 0.74 | 0.82 | 0.81 | 0.80 | 0.77 | 0.74 | 0.69 | 0.52 | 0.45 | 0.38 | 0.31 | 0.24 | 0.18 | 0.13 | 0.09 | 0.07 | 0.05 | 0.04 | 0.03 | 0.02 | 0.01 | 0.01 | 0.00 |
| 9999.00  | 0.62 | 0.76 | 0.83 | 0.83 | 0.84 | 0.80 | 0.76 | 0.72 | 0.54 | 0.47 | 0.39 | 0.32 | 0.24 | 0.18 | 0.13 | 0.10 | 0.08 | 0.06 | 0.04 | 0.03 | 0.02 | 0.01 | 0.01 | 0.00 |
| 10665.60 | 0.65 | 0.79 | 0.84 | 0.86 | 0.88 | 0.84 | 0.78 | 0.73 | 0.56 | 0.48 | 0.39 | 0.32 | 0.25 | 0.18 | 0.14 | 0.11 | 0.08 | 0.06 | 0.04 | 0.03 | 0.02 | 0.01 | 0.01 | 0.00 |
| 11332.20 | 0.69 | 0.84 | 0.87 | 0.91 | 0.91 | 0.88 | 0.80 | 0.73 | 0.58 | 0.49 | 0.39 | 0.32 | 0.25 | 0.19 | 0.14 | 0.11 | 0.08 | 0.06 | 0.05 | 0.03 | 0.02 | 0.01 | 0.01 | 0.00 |
| 11998.80 | 0.74 | 0.89 | 0.91 | 0.95 | 0.92 | 0.93 | 0.83 | 0.73 | 0.60 | 0.48 | 0.39 | 0.33 | 0.25 | 0.19 | 0.15 | 0.11 | 0.08 | 0.06 | 0.04 | 0.03 | 0.02 | 0.01 | 0.01 | 0.00 |
| 12665.40 | 0.78 | 0.92 | 0.95 | 1.01 | 0.93 | 0.95 | 0.84 | 0.72 | 0.60 | 0.48 | 0.39 | 0.33 | 0.26 | 0.20 | 0.15 | 0.11 | 0.08 | 0.06 | 0.04 | 0.03 | 0.02 | 0.01 | 0.01 | 0.00 |
| 13332.00 | 0.81 | 0.93 | 0.98 | 1.06 | 0.95 | 0.95 | 0.84 | 0.71 | 0.60 | 0.48 | 0.39 | 0.34 | 0.26 | 0.20 | 0.16 | 0.11 | 0.09 | 0.06 | 0.04 | 0.03 | 0.02 | 0.01 | 0.01 | 0.00 |
| 13998.60 | 0.83 | 0.92 | 1.01 | 1.10 | 0.95 | 0.96 | 0.85 | 0.70 | 0.59 | 0.47 | 0.40 | 0.34 | 0.26 | 0.20 | 0.16 | 0.12 | 0.08 | 0.06 | 0.04 | 0.03 | 0.02 | 0.01 | 0.01 | 0.00 |
| 14665.20 | 0.84 | 0.92 | 1.02 | 1.12 | 0.96 | 0.99 | 0.86 | 0.71 | 0.59 | 0.48 | 0.41 | 0.35 | 0.27 | 0.21 | 0.16 | 0.12 | 0.09 | 0.06 | 0.04 | 0.03 | 0.02 | 0.02 | 0.01 | 0.01 |

**Table S23.** Rotational population as a function of the hexapole voltage (HV) of A 1-chloroethanol in 0.5 m hexapole.

| HV       | M=0  | M=1  | M=2  | M=3  | M=4  | M=5  | M=6  | M=7  | M=8  | M=9  | M=10 | M=11 | M=12 | M=13 | M=14 | M=15 | M=16 | M=17 | M=18 | M=19 | M=20 | M=21 | M=22 | M=23 |
|----------|------|------|------|------|------|------|------|------|------|------|------|------|------|------|------|------|------|------|------|------|------|------|------|------|
| 0.00     | 0.04 | 0.04 | 0.04 | 0.04 | 0.03 | 0.03 | 0.03 | 0.02 | 0.02 | 0.02 | 0.01 | 0.01 | 0.01 | 0.01 | 0.00 | 0.00 | 0.00 | 0.00 | 0.00 | 0.00 | 0.00 | 0.00 | 0.00 | 0.00 |
| 666.60   | 0.04 | 0.04 | 0.04 | 0.04 | 0.03 | 0.03 | 0.03 | 0.02 | 0.02 | 0.02 | 0.01 | 0.01 | 0.01 | 0.01 | 0.01 | 0.00 | 0.00 | 0.00 | 0.00 | 0.00 | 0.00 | 0.00 | 0.00 | 0.00 |
| 1333.20  | 0.04 | 0.04 | 0.04 | 0.04 | 0.04 | 0.04 | 0.03 | 0.03 | 0.03 | 0.02 | 0.02 | 0.01 | 0.01 | 0.01 | 0.01 | 0.00 | 0.00 | 0.00 | 0.00 | 0.00 | 0.00 | 0.00 | 0.00 | 0.00 |
| 1999.80  | 0.04 | 0.04 | 0.04 | 0.04 | 0.04 | 0.04 | 0.04 | 0.03 | 0.03 | 0.02 | 0.02 | 0.02 | 0.01 | 0.01 | 0.01 | 0.01 | 0.00 | 0.00 | 0.00 | 0.00 | 0.00 | 0.00 | 0.00 | 0.00 |
| 2666.40  | 0.04 | 0.04 | 0.04 | 0.05 | 0.05 | 0.04 | 0.04 | 0.04 | 0.03 | 0.03 | 0.02 | 0.02 | 0.02 | 0.01 | 0.01 | 0.01 | 0.01 | 0.00 | 0.00 | 0.00 | 0.00 | 0.00 | 0.00 | 0.00 |
| 3333.00  | 0.04 | 0.04 | 0.05 | 0.05 | 0.05 | 0.05 | 0.05 | 0.04 | 0.04 | 0.04 | 0.03 | 0.03 | 0.03 | 0.02 | 0.02 | 0.02 | 0.01 | 0.01 | 0.01 | 0.01 | 0.00 | 0.00 | 0.00 | 0.00 |
| 3999.60  | 0.04 | 0.04 | 0.05 | 0.05 | 0.05 | 0.05 | 0.07 | 0.10 | 0.12 | 0.12 | 0.11 | 0.11 | 0.10 | 0.09 | 0.08 | 0.07 | 0.05 | 0.04 | 0.03 | 0.03 | 0.02 | 0.01 | 0.01 | 0.01 |
| 4666.20  | 0.04 | 0.04 | 0.05 | 0.06 | 0.06 | 0.10 | 0.18 | 0.22 | 0.22 | 0.21 | 0.21 | 0.21 | 0.19 | 0.16 | 0.14 | 0.11 | 0.09 | 0.07 | 0.05 | 0.04 | 0.03 | 0.02 | 0.01 | 0.01 |
| 5332.80  | 0.04 | 0.04 | 0.05 | 0.09 | 0.14 | 0.25 | 0.32 | 0.33 | 0.32 | 0.33 | 0.32 | 0.28 | 0.23 | 0.20 | 0.16 | 0.12 | 0.09 | 0.07 | 0.05 | 0.03 | 0.02 | 0.01 | 0.01 | 0.00 |
| 5999.40  | 0.04 | 0.04 | 0.06 | 0.16 | 0.26 | 0.40 | 0.44 | 0.43 | 0.45 | 0.44 | 0.38 | 0.31 | 0.26 | 0.21 | 0.16 | 0.12 | 0.09 | 0.06 | 0.04 | 0.03 | 0.02 | 0.01 | 0.01 | 0.00 |
| 6666.00  | 0.04 | 0.05 | 0.09 | 0.21 | 0.37 | 0.53 | 0.54 | 0.55 | 0.57 | 0.50 | 0.42 | 0.34 | 0.27 | 0.21 | 0.15 | 0.11 | 0.08 | 0.06 | 0.04 | 0.03 | 0.02 | 0.01 | 0.01 | 0.00 |
| 7332.60  | 0.04 | 0.05 | 0.14 | 0.27 | 0.50 | 0.62 | 0.63 | 0.67 | 0.65 | 0.54 | 0.45 | 0.36 | 0.27 | 0.21 | 0.15 | 0.11 | 0.08 | 0.05 | 0.04 | 0.03 | 0.02 | 0.01 | 0.01 | 0.00 |
| 7999.20  | 0.04 | 0.05 | 0.17 | 0.34 | 0.64 | 0.68 | 0.76 | 0.74 | 0.69 | 0.57 | 0.47 | 0.36 | 0.28 | 0.21 | 0.15 | 0.11 | 0.08 | 0.06 | 0.04 | 0.03 | 0.02 | 0.01 | 0.01 | 0.00 |
| 8665.80  | 0.04 | 0.05 | 0.21 | 0.42 | 0.73 | 0.74 | 0.86 | 0.78 | 0.73 | 0.58 | 0.47 | 0.37 | 0.29 | 0.21 | 0.15 | 0.11 | 0.08 | 0.06 | 0.04 | 0.03 | 0.02 | 0.01 | 0.01 | 0.00 |
| 9332.40  | 0.04 | 0.05 | 0.25 | 0.51 | 0.78 | 0.85 | 0.91 | 0.83 | 0.75 | 0.59 | 0.47 | 0.38 | 0.29 | 0.21 | 0.15 | 0.12 | 0.08 | 0.06 | 0.04 | 0.03 | 0.02 | 0.01 | 0.01 | 0.00 |
| 9999.00  | 0.04 | 0.06 | 0.28 | 0.62 | 0.81 | 0.97 | 0.94 | 0.88 | 0.75 | 0.60 | 0.47 | 0.38 | 0.29 | 0.21 | 0.16 | 0.12 | 0.09 | 0.06 | 0.04 | 0.03 | 0.02 | 0.01 | 0.01 | 0.00 |
| 10665.60 | 0.04 | 0.07 | 0.32 | 0.73 | 0.86 | 1.05 | 0.97 | 0.89 | 0.74 | 0.61 | 0.48 | 0.38 | 0.29 | 0.21 | 0.16 | 0.12 | 0.09 | 0.06 | 0.04 | 0.03 | 0.02 | 0.01 | 0.01 | 0.00 |
| 11332.20 | 0.04 | 0.08 | 0.36 | 0.82 | 0.94 | 1.10 | 1.01 | 0.89 | 0.75 | 0.62 | 0.48 | 0.38 | 0.30 | 0.22 | 0.16 | 0.12 | 0.09 | 0.06 | 0.04 | 0.03 | 0.02 | 0.01 | 0.01 | 0.00 |
| 11998.80 | 0.04 | 0.09 | 0.42 | 0.87 | 1.04 | 1.14 | 1.04 | 0.90 | 0.76 | 0.63 | 0.48 | 0.38 | 0.31 | 0.22 | 0.17 | 0.12 | 0.09 | 0.06 | 0.04 | 0.03 | 0.02 | 0.01 | 0.01 | 0.00 |
| 12665.40 | 0.04 | 0.09 | 0.48 | 0.90 | 1.12 | 1.19 | 1.06 | 0.90 | 0.77 | 0.63 | 0.49 | 0.39 | 0.31 | 0.23 | 0.16 | 0.12 | 0.08 | 0.06 | 0.04 | 0.03 | 0.02 | 0.01 | 0.01 | 0.00 |
| 13332.00 | 0.04 | 0.11 | 0.55 | 0.93 | 1.18 | 1.24 | 1.05 | 0.90 | 0.78 | 0.64 | 0.49 | 0.39 | 0.31 | 0.23 | 0.16 | 0.12 | 0.08 | 0.06 | 0.04 | 0.03 | 0.02 | 0.01 | 0.01 | 0.00 |
| 13998.60 | 0.04 | 0.14 | 0.63 | 0.96 | 1.23 | 1.28 | 1.06 | 0.92 | 0.79 | 0.66 | 0.50 | 0.40 | 0.32 | 0.23 | 0.16 | 0.12 | 0.08 | 0.06 | 0.04 | 0.02 | 0.02 | 0.01 | 0.01 | 0.00 |
| 14665.20 | 0.04 | 0.16 | 0.71 | 1.02 | 1.25 | 1.29 | 1.07 | 0.92 | 0.80 | 0.67 | 0.51 | 0.40 | 0.32 | 0.24 | 0.16 | 0.11 | 0.08 | 0.06 | 0.04 | 0.02 | 0.02 | 0.01 | 0.00 | 0.00 |

**Table S24.** Rotational population as a function of the hexapole voltage (HV) of S 1-chloroethanol in 0.5 m hexapole.

| HV       | M=0  | M=1  | M=2  | M=3  | M=4  | M=5  | M=6  | M=7  | M=8  | M=9  | M=10 | M=11 | M=12 | M=13 | M=14 | M=15 | M=16 | M=17 | M=18 | M=19 | M=20 | M=21 | M=22 | M=23 |
|----------|------|------|------|------|------|------|------|------|------|------|------|------|------|------|------|------|------|------|------|------|------|------|------|------|
| 0.00     | 0.04 | 0.04 | 0.04 | 0.04 | 0.04 | 0.03 | 0.03 | 0.02 | 0.02 | 0.02 | 0.01 | 0.01 | 0.01 | 0.01 | 0.00 | 0.00 | 0.00 | 0.00 | 0.00 | 0.00 | 0.00 | 0.00 | 0.00 | 0.00 |
| 666.60   | 0.04 | 0.04 | 0.04 | 0.04 | 0.04 | 0.03 | 0.03 | 0.03 | 0.02 | 0.02 | 0.01 | 0.01 | 0.01 | 0.01 | 0.00 | 0.00 | 0.00 | 0.00 | 0.00 | 0.00 | 0.00 | 0.00 | 0.00 | 0.00 |
| 1333.20  | 0.04 | 0.04 | 0.04 | 0.04 | 0.04 | 0.04 | 0.04 | 0.03 | 0.03 | 0.02 | 0.02 | 0.01 | 0.01 | 0.01 | 0.01 | 0.00 | 0.00 | 0.00 | 0.00 | 0.00 | 0.00 | 0.00 | 0.00 | 0.00 |
| 1999.80  | 0.04 | 0.04 | 0.05 | 0.05 | 0.05 | 0.05 | 0.04 | 0.04 | 0.03 | 0.03 | 0.02 | 0.02 | 0.01 | 0.01 | 0.01 | 0.01 | 0.00 | 0.00 | 0.00 | 0.00 | 0.00 | 0.00 | 0.00 | 0.00 |
| 2666.40  | 0.04 | 0.04 | 0.05 | 0.06 | 0.06 | 0.06 | 0.06 | 0.06 | 0.04 | 0.05 | 0.04 | 0.03 | 0.02 | 0.02 | 0.01 | 0.01 | 0.01 | 0.00 | 0.00 | 0.00 | 0.00 | 0.00 | 0.00 | 0.00 |
| 3333.00  | 0.04 | 0.05 | 0.06 | 0.13 | 0.15 | 0.17 | 0.17 | 0.15 | 0.15 | 0.12 | 0.10 | 0.08 | 0.06 | 0.04 | 0.03 | 0.02 | 0.01 | 0.01 | 0.00 | 0.00 | 0.00 | 0.00 | 0.00 | 0.00 |
| 3999.60  | 0.04 | 0.05 | 0.12 | 0.19 | 0.23 | 0.29 | 0.29 | 0.31 | 0.27 | 0.21 | 0.17 | 0.13 | 0.10 | 0.07 | 0.05 | 0.03 | 0.02 | 0.01 | 0.01 | 0.00 | 0.00 | 0.00 | 0.00 | 0.00 |
| 4666.20  | 0.04 | 0.05 | 0.17 | 0.23 | 0.37 | 0.37 | 0.45 | 0.41 | 0.35 | 0.28 | 0.22 | 0.17 | 0.13 | 0.09 | 0.06 | 0.04 | 0.03 | 0.02 | 0.01 | 0.01 | 0.00 | 0.00 | 0.00 | 0.00 |
| 5332.80  | 0.04 | 0.05 | 0.22 | 0.28 | 0.43 | 0.49 | 0.53 | 0.47 | 0.40 | 0.33 | 0.24 | 0.20 | 0.15 | 0.11 | 0.07 | 0.05 | 0.03 | 0.02 | 0.01 | 0.01 | 0.01 | 0.00 | 0.00 | 0.00 |
| 5999.40  | 0.04 | 0.07 | 0.24 | 0.40 | 0.46 | 0.61 | 0.56 | 0.51 | 0.41 | 0.35 | 0.25 | 0.21 | 0.15 | 0.11 | 0.08 | 0.05 | 0.03 | 0.02 | 0.02 | 0.01 | 0.01 | 0.00 | 0.00 | 0.00 |
| 6666.00  | 0.04 | 0.09 | 0.27 | 0.49 | 0.56 | 0.65 | 0.61 | 0.53 | 0.43 | 0.36 | 0.26 | 0.22 | 0.16 | 0.11 | 0.07 | 0.05 | 0.04 | 0.02 | 0.01 | 0.01 | 0.01 | 0.00 | 0.00 | 0.00 |
| 7332.60  | 0.04 | 0.11 | 0.29 | 0.51 | 0.67 | 0.69 | 0.63 | 0.54 | 0.44 | 0.37 | 0.28 | 0.22 | 0.15 | 0.10 | 0.07 | 0.05 | 0.04 | 0.02 | 0.01 | 0.01 | 0.01 | 0.00 | 0.00 | 0.00 |
| 7999.20  | 0.04 | 0.14 | 0.33 | 0.53 | 0.71 | 0.73 | 0.64 | 0.55 | 0.45 | 0.37 | 0.28 | 0.21 | 0.15 | 0.11 | 0.07 | 0.06 | 0.04 | 0.02 | 0.01 | 0.01 | 0.01 | 0.00 | 0.00 | 0.00 |
| 8665.80  | 0.04 | 0.19 | 0.41 | 0.60 | 0.74 | 0.75 | 0.65 | 0.56 | 0.47 | 0.38 | 0.29 | 0.21 | 0.15 | 0.11 | 0.07 | 0.06 | 0.04 | 0.02 | 0.02 | 0.01 | 0.01 | 0.00 | 0.00 | 0.00 |
| 9332.40  | 0.04 | 0.23 | 0.49 | 0.69 | 0.79 | 0.76 | 0.66 | 0.57 | 0.48 | 0.39 | 0.30 | 0.22 | 0.17 | 0.12 | 0.08 | 0.07 | 0.05 | 0.03 | 0.02 | 0.01 | 0.01 | 0.01 | 0.00 | 0.00 |
| 9999.00  | 0.04 | 0.25 | 0.55 | 0.74 | 0.82 | 0.75 | 0.67 | 0.58 | 0.49 | 0.39 | 0.31 | 0.24 | 0.18 | 0.14 | 0.10 | 0.08 | 0.06 | 0.04 | 0.03 | 0.02 | 0.01 | 0.01 | 0.01 | 0.00 |
| 10665.60 | 0.04 | 0.27 | 0.56 | 0.76 | 0.84 | 0.76 | 0.68 | 0.59 | 0.51 | 0.42 | 0.34 | 0.27 | 0.22 | 0.17 | 0.13 | 0.11 | 0.08 | 0.06 | 0.04 | 0.03 | 0.02 | 0.02 | 0.01 | 0.01 |
| 11332.20 | 0.04 | 0.28 | 0.56 | 0.78 | 0.85 | 0.77 | 0.69 | 0.62 | 0.54 | 0.46 | 0.38 | 0.31 | 0.26 | 0.21 | 0.16 | 0.13 | 0.10 | 0.08 | 0.06 | 0.04 | 0.03 | 0.02 | 0.01 | 0.01 |
| 11998.80 | 0.04 | 0.29 | 0.58 | 0.81 | 0.85 | 0.78 | 0.71 | 0.65 | 0.57 | 0.49 | 0.42 | 0.35 | 0.31 | 0.24 | 0.19 | 0.15 | 0.12 | 0.09 | 0.07 | 0.05 | 0.03 | 0.02 | 0.01 | 0.01 |
| 12665.40 | 0.04 | 0.29 | 0.63 | 0.84 | 0.84 | 0.79 | 0.73 | 0.68 | 0.60 | 0.52 | 0.45 | 0.40 | 0.34 | 0.26 | 0.21 | 0.17 | 0.13 | 0.10 | 0.07 | 0.05 | 0.03 | 0.02 | 0.01 | 0.01 |
| 13332.00 | 0.04 | 0.29 | 0.69 | 0.87 | 0.84 | 0.81 | 0.77 | 0.71 | 0.62 | 0.54 | 0.49 | 0.44 | 0.37 | 0.28 | 0.22 | 0.18 | 0.14 | 0.10 | 0.07 | 0.05 | 0.03 | 0.02 | 0.01 | 0.01 |
| 13998.60 | 0.04 | 0.30 | 0.75 | 0.89 | 0.85 | 0.85 | 0.83 | 0.73 | 0.64 | 0.56 | 0.53 | 0.46 | 0.38 | 0.29 | 0.23 | 0.18 | 0.14 | 0.10 | 0.07 | 0.05 | 0.03 | 0.02 | 0.01 | 0.01 |
| 14665.20 | 0.04 | 0.30 | 0.80 | 0.89 | 0.86 | 0.88 | 0.88 | 0.76 | 0.66 | 0.59 | 0.57 | 0.48 | 0.39 | 0.29 | 0.24 | 0.18 | 0.13 | 0.09 | 0.06 | 0.04 | 0.03 | 0.02 | 0.01 | 0.00 |

**Table S25.** Rotational population as a function of the hexapole voltage (HV) of A 1-chloroethanol in 1 m hexapole.

| HV       | M=0  | M=1  | M=2  | M=3  | M=4  | M=5  | M=6  | M=7  | M=8  | M=9  | M=10 | M=11 | M=12 | M=13 | M=14 | M=15 | M=16 | M=17 | M=18 | M=19 | M=20 | M=21 | M=22 | M=23 |
|----------|------|------|------|------|------|------|------|------|------|------|------|------|------|------|------|------|------|------|------|------|------|------|------|------|
| 0.00     | 0.04 | 0.04 | 0.04 | 0.04 | 0.03 | 0.03 | 0.03 | 0.02 | 0.02 | 0.02 | 0.01 | 0.01 | 0.01 | 0.01 | 0.00 | 0.00 | 0.00 | 0.00 | 0.00 | 0.00 | 0.00 | 0.00 | 0.00 | 0.00 |
| 666.60   | 0.04 | 0.04 | 0.03 | 0.03 | 0.03 | 0.02 | 0.02 | 0.02 | 0.01 | 0.01 | 0.01 | 0.01 | 0.01 | 0.00 | 0.00 | 0.00 | 0.00 | 0.00 | 0.00 | 0.00 | 0.00 | 0.00 | 0.00 | 0.00 |
| 1333.20  | 0.04 | 0.04 | 0.03 | 0.03 | 0.03 | 0.03 | 0.03 | 0.03 | 0.03 | 0.03 | 0.03 | 0.03 | 0.02 | 0.02 | 0.02 | 0.02 | 0.01 | 0.01 | 0.01 | 0.01 | 0.00 | 0.00 | 0.00 | 0.00 |
| 1999.80  | 0.04 | 0.03 | 0.03 | 0.05 | 0.08 | 0.15 | 0.21 | 0.23 | 0.22 | 0.23 | 0.23 | 0.21 | 0.17 | 0.15 | 0.12 | 0.10 | 0.07 | 0.05 | 0.04 | 0.03 | 0.02 | 0.01 | 0.01 | 0.00 |
| 2666.40  | 0.04 | 0.03 | 0.07 | 0.16 | 0.30 | 0.44 | 0.43 | 0.45 | 0.46 | 0.40 | 0.33 | 0.27 | 0.21 | 0.16 | 0.12 | 0.09 | 0.06 | 0.04 | 0.03 | 0.02 | 0.01 | 0.01 | 0.00 | 0.00 |
| 3333.00  | 0.04 | 0.03 | 0.15 | 0.30 | 0.55 | 0.54 | 0.64 | 0.59 | 0.55 | 0.43 | 0.35 | 0.28 | 0.22 | 0.16 | 0.11 | 0.08 | 0.06 | 0.04 | 0.03 | 0.02 | 0.01 | 0.01 | 0.00 | 0.00 |
| 3999.60  | 0.04 | 0.05 | 0.21 | 0.51 | 0.60 | 0.73 | 0.71 | 0.65 | 0.53 | 0.43 | 0.34 | 0.27 | 0.20 | 0.15 | 0.11 | 0.08 | 0.06 | 0.04 | 0.03 | 0.02 | 0.01 | 0.01 | 0.00 | 0.00 |
| 4666.20  | 0.04 | 0.06 | 0.30 | 0.65 | 0.74 | 0.79 | 0.74 | 0.62 | 0.51 | 0.41 | 0.32 | 0.25 | 0.19 | 0.14 | 0.10 | 0.07 | 0.05 | 0.04 | 0.03 | 0.02 | 0.01 | 0.01 | 0.00 | 0.00 |
| 5332.80  | 0.04 | 0.09 | 0.43 | 0.67 | 0.84 | 0.84 | 0.71 | 0.59 | 0.49 | 0.41 | 0.31 | 0.24 | 0.19 | 0.14 | 0.10 | 0.07 | 0.05 | 0.04 | 0.03 | 0.02 | 0.01 | 0.01 | 0.00 | 0.00 |
| 5999.40  | 0.04 | 0.14 | 0.60 | 0.77 | 0.90 | 0.83 | 0.68 | 0.58 | 0.50 | 0.43 | 0.31 | 0.24 | 0.20 | 0.16 | 0.11 | 0.08 | 0.06 | 0.04 | 0.03 | 0.02 | 0.01 | 0.01 | 0.01 | 0.00 |
| 6666.00  | 0.04 | 0.19 | 0.72 | 0.87 | 0.93 | 0.83 | 0.68 | 0.61 | 0.53 | 0.46 | 0.34 | 0.28 | 0.23 | 0.19 | 0.13 | 0.10 | 0.08 | 0.05 | 0.04 | 0.03 | 0.02 | 0.01 | 0.01 | 0.00 |
| 7332.60  | 0.04 | 0.23 | 0.74 | 0.92 | 0.92 | 0.83 | 0.73 | 0.65 | 0.56 | 0.48 | 0.36 | 0.32 | 0.27 | 0.22 | 0.15 | 0.12 | 0.09 | 0.06 | 0.04 | 0.03 | 0.02 | 0.01 | 0.01 | 0.00 |
| 7999.20  | 0.04 | 0.25 | 0.74 | 0.97 | 0.93 | 0.85 | 0.78 | 0.68 | 0.58 | 0.50 | 0.40 | 0.36 | 0.30 | 0.23 | 0.16 | 0.13 | 0.09 | 0.06 | 0.04 | 0.03 | 0.02 | 0.01 | 0.01 | 0.00 |
| 8665.80  | 0.04 | 0.28 | 0.79 | 1.05 | 0.94 | 0.88 | 0.82 | 0.70 | 0.61 | 0.54 | 0.43 | 0.38 | 0.31 | 0.23 | 0.17 | 0.13 | 0.08 | 0.06 | 0.04 | 0.03 | 0.02 | 0.01 | 0.01 | 0.00 |
| 9332.40  | 0.04 | 0.33 | 0.85 | 1.14 | 0.98 | 0.93 | 0.84 | 0.72 | 0.64 | 0.56 | 0.46 | 0.39 | 0.31 | 0.23 | 0.17 | 0.12 | 0.08 | 0.06 | 0.04 | 0.03 | 0.02 | 0.01 | 0.01 | 0.00 |
| 9999.00  | 0.04 | 0.38 | 0.90 | 1.17 | 0.99 | 0.95 | 0.86 | 0.75 | 0.69 | 0.58 | 0.48 | 0.40 | 0.31 | 0.23 | 0.16 | 0.12 | 0.07 | 0.05 | 0.04 | 0.02 | 0.01 | 0.01 | 0.00 | 0.00 |
| 10665.60 | 0.05 | 0.44 | 0.95 | 1.17 | 1.00 | 0.97 | 0.86 | 0.77 | 0.72 | 0.59 | 0.49 | 0.40 | 0.31 | 0.22 | 0.16 | 0.12 | 0.07 | 0.05 | 0.03 | 0.02 | 0.01 | 0.01 | 0.00 | 0.00 |
| 11332.20 | 0.05 | 0.52 | 0.99 | 1.14 | 1.03 | 1.00 | 0.90 | 0.80 | 0.74 | 0.60 | 0.50 | 0.40 | 0.31 | 0.22 | 0.16 | 0.11 | 0.07 | 0.05 | 0.03 | 0.02 | 0.01 | 0.01 | 0.00 | 0.00 |
| 11998.80 | 0.06 | 0.60 | 1.09 | 1.14 | 1.05 | 1.01 | 0.91 | 0.83 | 0.75 | 0.61 | 0.51 | 0.39 | 0.30 | 0.22 | 0.16 | 0.11 | 0.07 | 0.05 | 0.03 | 0.02 | 0.01 | 0.01 | 0.00 | 0.00 |
| 12665.40 | 0.06 | 0.69 | 1.14 | 1.12 | 1.08 | 1.02 | 0.93 | 0.85 | 0.75 | 0.61 | 0.50 | 0.38 | 0.30 | 0.21 | 0.15 | 0.11 | 0.07 | 0.05 | 0.03 | 0.02 | 0.01 | 0.01 | 0.00 | 0.00 |
| 13332.00 | 0.06 | 0.75 | 1.18 | 1.11 | 1.11 | 1.01 | 0.97 | 0.86 | 0.75 | 0.61 | 0.50 | 0.38 | 0.28 | 0.20 | 0.15 | 0.10 | 0.07 | 0.05 | 0.03 | 0.02 | 0.01 | 0.01 | 0.00 | 0.00 |
| 13998.60 | 0.07 | 0.78 | 1.19 | 1.09 | 1.13 | 1.03 | 0.99 | 0.88 | 0.74 | 0.60 | 0.49 | 0.37 | 0.28 | 0.20 | 0.15 | 0.10 | 0.07 | 0.05 | 0.03 | 0.02 | 0.01 | 0.01 | 0.00 | 0.00 |
| 14665.20 | 0.07 | 0.80 | 1.19 | 1.10 | 1.13 | 1.05 | 0.98 | 0.87 | 0.74 | 0.59 | 0.49 | 0.36 | 0.28 | 0.20 | 0.14 | 0.10 | 0.07 | 0.05 | 0.03 | 0.02 | 0.01 | 0.01 | 0.01 | 0.00 |

**Table S26.** Rotational population as a function of the hexapole voltage (HV) of S 1-chloroethanol in 1 m hexapole.

| HV       | M=0  | M=1  | M=2  | M=3  | M=4  | M=5  | M=6  | M=7  | M=8  | M=9  | M=10 | M=11 | M=12 | M=13 | M=14 | M=15 | M=16 | M=17 | M=18 | M=19 | M=20 | M=21 | M=22 | M=23 |
|----------|------|------|------|------|------|------|------|------|------|------|------|------|------|------|------|------|------|------|------|------|------|------|------|------|
| 0.00     | 0.04 | 0.04 | 0.04 | 0.04 | 0.03 | 0.03 | 0.03 | 0.02 | 0.02 | 0.02 | 0.01 | 0.01 | 0.01 | 0.01 | 0.00 | 0.00 | 0.00 | 0.00 | 0.00 | 0.00 | 0.00 | 0.00 | 0.00 | 0.00 |
| 666.60   | 0.04 | 0.04 | 0.03 | 0.03 | 0.03 | 0.03 | 0.02 | 0.02 | 0.02 | 0.01 | 0.01 | 0.01 | 0.01 | 0.00 | 0.00 | 0.00 | 0.00 | 0.00 | 0.00 | 0.00 | 0.00 | 0.00 | 0.00 | 0.00 |
| 1333.20  | 0.04 | 0.04 | 0.04 | 0.11 | 0.12 | 0.14 | 0.14 | 0.13 | 0.12 | 0.10 | 0.08 | 0.06 | 0.04 | 0.03 | 0.02 | 0.01 | 0.01 | 0.01 | 0.00 | 0.00 | 0.00 | 0.00 | 0.00 | 0.00 |
| 1999.80  | 0.04 | 0.04 | 0.16 | 0.21 | 0.32 | 0.34 | 0.38 | 0.33 | 0.30 | 0.24 | 0.18 | 0.14 | 0.11 | 0.08 | 0.05 | 0.04 | 0.02 | 0.02 | 0.01 | 0.01 | 0.00 | 0.00 | 0.00 | 0.00 |
| 2666.40  | 0.04 | 0.07 | 0.21 | 0.38 | 0.45 | 0.46 | 0.44 | 0.38 | 0.31 | 0.25 | 0.19 | 0.15 | 0.11 | 0.07 | 0.05 | 0.04 | 0.03 | 0.02 | 0.01 | 0.01 | 0.00 | 0.00 | 0.00 | 0.00 |
| 3333.00  | 0.04 | 0.14 | 0.31 | 0.44 | 0.50 | 0.50 | 0.43 | 0.36 | 0.30 | 0.24 | 0.19 | 0.14 | 0.10 | 0.07 | 0.05 | 0.04 | 0.03 | 0.02 | 0.01 | 0.01 | 0.00 | 0.00 | 0.00 | 0.00 |
| 3999.60  | 0.04 | 0.20 | 0.42 | 0.54 | 0.55 | 0.50 | 0.41 | 0.36 | 0.33 | 0.28 | 0.23 | 0.18 | 0.14 | 0.11 | 0.09 | 0.07 | 0.05 | 0.04 | 0.03 | 0.02 | 0.02 | 0.01 | 0.01 | 0.00 |
| 4666.20  | 0.04 | 0.22 | 0.44 | 0.55 | 0.56 | 0.48 | 0.44 | 0.45 | 0.43 | 0.38 | 0.32 | 0.27 | 0.23 | 0.19 | 0.15 | 0.12 | 0.09 | 0.07 | 0.05 | 0.04 | 0.03 | 0.02 | 0.01 | 0.01 |
| 5332.80  | 0.04 | 0.23 | 0.55 | 0.60 | 0.57 | 0.52 | 0.57 | 0.58 | 0.51 | 0.43 | 0.39 | 0.34 | 0.28 | 0.21 | 0.17 | 0.14 | 0.10 | 0.07 | 0.05 | 0.04 | 0.02 | 0.01 | 0.01 | 0.00 |
| 5999.40  | 0.04 | 0.24 | 0.60 | 0.63 | 0.57 | 0.62 | 0.71 | 0.63 | 0.56 | 0.49 | 0.45 | 0.35 | 0.28 | 0.22 | 0.17 | 0.13 | 0.09 | 0.06 | 0.04 | 0.03 | 0.02 | 0.01 | 0.01 | 0.00 |
| 6666.00  | 0.04 | 0.30 | 0.61 | 0.62 | 0.60 | 0.79 | 0.76 | 0.68 | 0.60 | 0.58 | 0.46 | 0.35 | 0.29 | 0.23 | 0.16 | 0.11 | 0.08 | 0.05 | 0.04 | 0.02 | 0.01 | 0.01 | 0.00 | 0.00 |
| 7332.60  | 0.04 | 0.39 | 0.64 | 0.62 | 0.69 | 0.89 | 0.80 | 0.73 | 0.65 | 0.62 | 0.45 | 0.37 | 0.29 | 0.22 | 0.15 | 0.11 | 0.07 | 0.05 | 0.03 | 0.02 | 0.01 | 0.01 | 0.00 | 0.00 |
| 7999.20  | 0.04 | 0.43 | 0.67 | 0.62 | 0.82 | 0.92 | 0.84 | 0.77 | 0.70 | 0.61 | 0.46 | 0.37 | 0.28 | 0.21 | 0.15 | 0.11 | 0.07 | 0.05 | 0.03 | 0.02 | 0.01 | 0.01 | 0.00 | 0.00 |
| 8665.80  | 0.04 | 0.44 | 0.69 | 0.63 | 0.92 | 0.94 | 0.84 | 0.81 | 0.70 | 0.59 | 0.45 | 0.37 | 0.27 | 0.21 | 0.14 | 0.10 | 0.07 | 0.05 | 0.03 | 0.02 | 0.01 | 0.01 | 0.00 | 0.00 |
| 9332.40  | 0.05 | 0.45 | 0.68 | 0.69 | 0.97 | 0.96 | 0.85 | 0.84 | 0.69 | 0.58 | 0.44 | 0.36 | 0.26 | 0.20 | 0.14 | 0.10 | 0.06 | 0.04 | 0.03 | 0.02 | 0.01 | 0.01 | 0.00 | 0.00 |
| 9999.00  | 0.05 | 0.50 | 0.67 | 0.79 | 0.99 | 0.97 | 0.87 | 0.83 | 0.70 | 0.55 | 0.44 | 0.36 | 0.25 | 0.19 | 0.14 | 0.10 | 0.06 | 0.04 | 0.03 | 0.02 | 0.01 | 0.01 | 0.00 | 0.00 |
| 10665.60 | 0.07 | 0.55 | 0.68 | 0.90 | 1.02 | 0.97 | 0.89 | 0.82 | 0.69 | 0.54 | 0.43 | 0.36 | 0.25 | 0.19 | 0.14 | 0.10 | 0.06 | 0.04 | 0.03 | 0.02 | 0.01 | 0.01 | 0.00 | 0.00 |
| 11332.20 | 0.10 | 0.58 | 0.69 | 0.96 | 1.06 | 0.97 | 0.90 | 0.81 | 0.68 | 0.52 | 0.43 | 0.37 | 0.24 | 0.18 | 0.14 | 0.10 | 0.06 | 0.04 | 0.03 | 0.02 | 0.01 | 0.01 | 0.00 | 0.00 |
| 11998.80 | 0.12 | 0.57 | 0.70 | 1.00 | 1.11 | 1.00 | 0.90 | 0.80 | 0.67 | 0.52 | 0.43 | 0.36 | 0.24 | 0.18 | 0.13 | 0.10 | 0.06 | 0.04 | 0.03 | 0.02 | 0.01 | 0.01 | 0.00 | 0.00 |
| 12665.40 | 0.13 | 0.56 | 0.73 | 1.03 | 1.12 | 1.02 | 0.90 | 0.80 | 0.67 | 0.52 | 0.43 | 0.36 | 0.24 | 0.18 | 0.13 | 0.09 | 0.06 | 0.04 | 0.03 | 0.02 | 0.01 | 0.01 | 0.00 | 0.00 |
| 13332.00 | 0.14 | 0.58 | 0.78 | 1.09 | 1.13 | 1.03 | 0.91 | 0.80 | 0.67 | 0.52 | 0.43 | 0.35 | 0.23 | 0.17 | 0.13 | 0.09 | 0.06 | 0.04 | 0.03 | 0.02 | 0.01 | 0.01 | 0.00 | 0.00 |
| 13998.60 | 0.15 | 0.62 | 0.84 | 1.15 | 1.12 | 1.04 | 0.91 | 0.79 | 0.67 | 0.52 | 0.42 | 0.35 | 0.23 | 0.18 | 0.13 | 0.09 | 0.06 | 0.04 | 0.03 | 0.02 | 0.01 | 0.01 | 0.00 | 0.00 |
| 14665.20 | 0.16 | 0.67 | 0.91 | 1.20 | 1.12 | 1.02 | 0.91 | 0.77 | 0.66 | 0.51 | 0.42 | 0.34 | 0.23 | 0.17 | 0.13 | 0.09 | 0.06 | 0.04 | 0.03 | 0.02 | 0.01 | 0.01 | 0.00 | 0.00 |



**Table S27.** Rotational population as a function of the hexapole voltage (HV) of A 1-chloroethanol in 2 m hexapole.

| HV       | M=0  | M=1  | M=2  | M=3  | M=4  | M=5  | M=6  | M=7  | M=8  | M=9  | M=10 | M=11 | M=12 | M=13 | M=14 | M=15 | M=16 | M=17 | M=18 | M=19 | M=20 | M=21 | M=22 | M=23 |
|----------|------|------|------|------|------|------|------|------|------|------|------|------|------|------|------|------|------|------|------|------|------|------|------|------|
| 0.00     | 0.00 | 0.00 | 0.00 | 0.00 | 0.00 | 0.00 | 0.00 | 0.00 | 0.00 | 0.00 | 0.00 | 0.00 | 0.00 | 0.00 | 0.00 | 0.00 | 0.00 | 0.00 | 0.00 | 0.00 | 0.00 | 0.00 | 0.00 | 0.00 |
| 666.60   | 0.00 | 0.00 | 0.00 | 0.01 | 0.03 | 0.08 | 0.12 | 0.14 | 0.13 | 0.14 | 0.14 | 0.13 | 0.11 | 0.09 | 0.08 | 0.06 | 0.05 | 0.03 | 0.03 | 0.02 | 0.01 | 0.01 | 0.00 | 0.00 |
| 1333.20  | 0.00 | 0.01 | 0.11 | 0.30 | 0.35 | 0.43 | 0.42 | 0.38 | 0.30 | 0.25 | 0.20 | 0.15 | 0.11 | 0.08 | 0.06 | 0.04 | 0.03 | 0.02 | 0.01 | 0.01 | 0.01 | 0.00 | 0.00 | 0.00 |
| 1999.80  | 0.00 | 0.07 | 0.35 | 0.44 | 0.48 | 0.45 | 0.37 | 0.31 | 0.27 | 0.21 | 0.18 | 0.13 | 0.11 | 0.09 | 0.06 | 0.05 | 0.04 | 0.03 | 0.02 | 0.01 | 0.01 | 0.01 | 0.00 | 0.00 |
| 2666.40  | 0.00 | 0.13 | 0.44 | 0.51 | 0.48 | 0.45 | 0.40 | 0.35 | 0.31 | 0.27 | 0.24 | 0.20 | 0.16 | 0.13 | 0.10 | 0.08 | 0.06 | 0.04 | 0.03 | 0.02 | 0.01 | 0.01 | 0.00 | 0.00 |
| 3333.00  | 0.00 | 0.21 | 0.52 | 0.54 | 0.53 | 0.51 | 0.46 | 0.41 | 0.40 | 0.35 | 0.27 | 0.22 | 0.18 | 0.14 | 0.10 | 0.07 | 0.05 | 0.04 | 0.03 | 0.02 | 0.01 | 0.01 | 0.00 | 0.00 |
| 3999.60  | 0.01 | 0.35 | 0.57 | 0.57 | 0.60 | 0.56 | 0.53 | 0.51 | 0.46 | 0.37 | 0.29 | 0.23 | 0.18 | 0.13 | 0.09 | 0.07 | 0.05 | 0.03 | 0.02 | 0.02 | 0.01 | 0.01 | 0.00 | 0.00 |
| 4666.20  | 0.01 | 0.48 | 0.58 | 0.59 | 0.64 | 0.58 | 0.61 | 0.55 | 0.49 | 0.39 | 0.31 | 0.25 | 0.19 | 0.15 | 0.11 | 0.08 | 0.06 | 0.04 | 0.03 | 0.02 | 0.01 | 0.01 | 0.01 | 0.00 |
| 5332.80  | 0.02 | 0.47 | 0.59 | 0.65 | 0.63 | 0.68 | 0.65 | 0.60 | 0.50 | 0.41 | 0.33 | 0.26 | 0.21 | 0.16 | 0.12 | 0.09 | 0.07 | 0.05 | 0.04 | 0.02 | 0.02 | 0.01 | 0.01 | 0.00 |
| 5999.40  | 0.02 | 0.48 | 0.62 | 0.71 | 0.70 | 0.75 | 0.69 | 0.60 | 0.51 | 0.42 | 0.34 | 0.27 | 0.22 | 0.17 | 0.13 | 0.10 | 0.07 | 0.05 | 0.04 | 0.02 | 0.02 | 0.01 | 0.01 | 0.00 |
| 6666.00  | 0.02 | 0.51 | 0.63 | 0.72 | 0.79 | 0.80 | 0.71 | 0.61 | 0.53 | 0.44 | 0.35 | 0.28 | 0.22 | 0.17 | 0.13 | 0.10 | 0.07 | 0.05 | 0.03 | 0.02 | 0.01 | 0.01 | 0.00 | 0.00 |
| 7332.60  | 0.03 | 0.55 | 0.66 | 0.73 | 0.86 | 0.86 | 0.72 | 0.62 | 0.55 | 0.47 | 0.36 | 0.29 | 0.23 | 0.18 | 0.13 | 0.10 | 0.07 | 0.05 | 0.03 | 0.02 | 0.01 | 0.01 | 0.00 | 0.00 |
| 7999.20  | 0.03 | 0.59 | 0.71 | 0.79 | 0.90 | 0.88 | 0.73 | 0.64 | 0.57 | 0.49 | 0.37 | 0.31 | 0.24 | 0.19 | 0.13 | 0.10 | 0.07 | 0.05 | 0.03 | 0.02 | 0.02 | 0.01 | 0.01 | 0.00 |
| 8665.80  | 0.03 | 0.60 | 0.78 | 0.87 | 0.95 | 0.89 | 0.75 | 0.68 | 0.60 | 0.50 | 0.39 | 0.32 | 0.25 | 0.20 | 0.14 | 0.10 | 0.07 | 0.05 | 0.04 | 0.02 | 0.02 | 0.01 | 0.01 | 0.00 |
| 9332.40  | 0.04 | 0.58 | 0.80 | 0.94 | 0.98 | 0.88 | 0.78 | 0.70 | 0.62 | 0.52 | 0.40 | 0.34 | 0.26 | 0.20 | 0.14 | 0.10 | 0.07 | 0.05 | 0.04 | 0.03 | 0.02 | 0.01 | 0.01 | 0.00 |
| 9999.00  | 0.05 | 0.57 | 0.80 | 0.98 | 0.99 | 0.88 | 0.81 | 0.72 | 0.64 | 0.52 | 0.42 | 0.35 | 0.27 | 0.20 | 0.15 | 0.11 | 0.08 | 0.05 | 0.04 | 0.03 | 0.02 | 0.01 | 0.01 | 0.00 |
| 10665.60 | 0.05 | 0.56 | 0.80 | 1.01 | 1.00 | 0.88 | 0.84 | 0.73 | 0.65 | 0.52 | 0.43 | 0.35 | 0.26 | 0.20 | 0.14 | 0.10 | 0.07 | 0.05 | 0.04 | 0.02 | 0.01 | 0.01 | 0.01 | 0.00 |
| 11332.20 | 0.06 | 0.57 | 0.82 | 1.07 | 1.00 | 0.92 | 0.85 | 0.74 | 0.65 | 0.54 | 0.44 | 0.34 | 0.26 | 0.20 | 0.14 | 0.10 | 0.07 | 0.05 | 0.04 | 0.02 | 0.01 | 0.01 | 0.01 | 0.00 |
| 11998.80 | 0.06 | 0.58 | 0.86 | 1.09 | 0.99 | 0.96 | 0.86 | 0.75 | 0.65 | 0.55 | 0.44 | 0.34 | 0.26 | 0.20 | 0.14 | 0.10 | 0.07 | 0.05 | 0.04 | 0.02 | 0.01 | 0.01 | 0.00 | 0.00 |
| 12665.40 | 0.07 | 0.58 | 0.90 | 1.11 | 0.99 | 0.97 | 0.87 | 0.75 | 0.67 | 0.55 | 0.44 | 0.34 | 0.26 | 0.20 | 0.14 | 0.10 | 0.07 | 0.05 | 0.04 | 0.02 | 0.01 | 0.01 | 0.00 | 0.00 |
| 13332.00 | 0.08 | 0.58 | 0.95 | 1.11 | 1.00 | 0.98 | 0.88 | 0.75 | 0.67 | 0.56 | 0.43 | 0.33 | 0.26 | 0.19 | 0.14 | 0.10 | 0.07 | 0.05 | 0.03 | 0.02 | 0.01 | 0.01 | 0.00 | 0.00 |
| 13998.60 | 0.09 | 0.59 | 1.00 | 1.10 | 1.01 | 0.99 | 0.88 | 0.76 | 0.68 | 0.55 | 0.43 | 0.33 | 0.26 | 0.19 | 0.14 | 0.10 | 0.07 | 0.05 | 0.03 | 0.02 | 0.01 | 0.01 | 0.01 | 0.00 |
| 14665.20 | 0.10 | 0.61 | 1.03 | 1.09 | 1.04 | 0.99 | 0.89 | 0.78 | 0.69 | 0.55 | 0.43 | 0.34 | 0.26 | 0.19 | 0.14 | 0.10 | 0.07 | 0.05 | 0.04 | 0.02 | 0.01 | 0.01 | 0.01 | 0.00 |

**Table S28.** Rotational population as a function of the hexapole voltage (HV) of S 1-chloroethanol in 2 m hexapole.

| HV       | M=0  | M=1  | M=2  | M=3  | M=4  | M=5  | M=6  | M=7  | M=8  | M=9  | M=10 | M=11 | M=12 | M=13 | M=14 | M=15 | M=16 | M=17 | M=18 | M=19 | M=20 | M=21 | M=22 | M=23 |
|----------|------|------|------|------|------|------|------|------|------|------|------|------|------|------|------|------|------|------|------|------|------|------|------|------|
| 0.00     | 0.00 | 0.00 | 0.00 | 0.00 | 0.00 | 0.00 | 0.00 | 0.00 | 0.00 | 0.00 | 0.00 | 0.00 | 0.00 | 0.00 | 0.00 | 0.00 | 0.00 | 0.00 | 0.00 | 0.00 | 0.00 | 0.00 | 0.00 | 0.00 |
| 666.60   | 0.00 | 0.00 | 0.08 | 0.11 | 0.19 | 0.19 | 0.22 | 0.20 | 0.18 | 0.15 | 0.11 | 0.08 | 0.06 | 0.05 | 0.03 | 0.02 | 0.01 | 0.01 | 0.01 | 0.00 | 0.00 | 0.00 | 0.00 | 0.00 |
| 1333.20  | 0.00 | 0.11 | 0.25 | 0.30 | 0.29 | 0.27 | 0.22 | 0.18 | 0.16 | 0.13 | 0.11 | 0.09 | 0.07 | 0.06 | 0.05 | 0.04 | 0.03 | 0.02 | 0.02 | 0.01 | 0.01 | 0.01 | 0.00 | 0.00 |
| 1999.80  | 0.00 | 0.13 | 0.35 | 0.34 | 0.33 | 0.34 | 0.39 | 0.36 | 0.31 | 0.28 | 0.27 | 0.22 | 0.17 | 0.13 | 0.10 | 0.08 | 0.05 | 0.04 | 0.03 | 0.02 | 0.01 | 0.01 | 0.01 | 0.00 |
| 2666.40  | 0.00 | 0.26 | 0.39 | 0.36 | 0.47 | 0.52 | 0.48 | 0.44 | 0.44 | 0.37 | 0.28 | 0.22 | 0.17 | 0.12 | 0.08 | 0.06 | 0.04 | 0.03 | 0.02 | 0.01 | 0.01 | 0.00 | 0.00 | 0.00 |
| 3333.00  | 0.00 | 0.30 | 0.39 | 0.47 | 0.57 | 0.57 | 0.55 | 0.51 | 0.43 | 0.34 | 0.26 | 0.20 | 0.15 | 0.11 | 0.07 | 0.05 | 0.04 | 0.02 | 0.02 | 0.01 | 0.01 | 0.00 | 0.00 | 0.00 |
| 3999.60  | 0.04 | 0.34 | 0.42 | 0.59 | 0.66 | 0.64 | 0.59 | 0.49 | 0.41 | 0.32 | 0.26 | 0.21 | 0.14 | 0.10 | 0.07 | 0.05 | 0.04 | 0.02 | 0.01 | 0.01 | 0.01 | 0.00 | 0.00 | 0.00 |
| 4666.20  | 0.06 | 0.38 | 0.52 | 0.68 | 0.70 | 0.70 | 0.58 | 0.49 | 0.44 | 0.34 | 0.27 | 0.21 | 0.15 | 0.11 | 0.07 | 0.05 | 0.04 | 0.02 | 0.02 | 0.01 | 0.01 | 0.00 | 0.00 | 0.00 |
| 5332.80  | 0.07 | 0.43 | 0.61 | 0.73 | 0.76 | 0.69 | 0.60 | 0.53 | 0.46 | 0.38 | 0.30 | 0.23 | 0.17 | 0.13 | 0.09 | 0.07 | 0.05 | 0.03 | 0.02 | 0.02 | 0.01 | 0.01 | 0.00 | 0.00 |
| 5999.40  | 0.08 | 0.43 | 0.66 | 0.72 | 0.81 | 0.67 | 0.63 | 0.57 | 0.51 | 0.42 | 0.34 | 0.26 | 0.21 | 0.16 | 0.12 | 0.09 | 0.07 | 0.05 | 0.04 | 0.03 | 0.02 | 0.01 | 0.01 | 0.00 |
| 6666.00  | 0.09 | 0.42 | 0.73 | 0.79 | 0.80 | 0.69 | 0.66 | 0.64 | 0.55 | 0.44 | 0.36 | 0.29 | 0.25 | 0.19 | 0.14 | 0.10 | 0.08 | 0.06 | 0.04 | 0.03 | 0.02 | 0.01 | 0.01 | 0.00 |
| 7332.60  | 0.10 | 0.43 | 0.79 | 0.84 | 0.77 | 0.72 | 0.75 | 0.68 | 0.56 | 0.43 | 0.38 | 0.32 | 0.26 | 0.19 | 0.14 | 0.10 | 0.08 | 0.05 | 0.04 | 0.02 | 0.02 | 0.01 | 0.01 | 0.00 |
| 7999.20  | 0.11 | 0.48 | 0.81 | 0.87 | 0.78 | 0.77 | 0.81 | 0.68 | 0.55 | 0.44 | 0.40 | 0.32 | 0.25 | 0.18 | 0.14 | 0.10 | 0.07 | 0.05 | 0.03 | 0.02 | 0.01 | 0.01 | 0.01 | 0.00 |
| 8665.80  | 0.13 | 0.51 | 0.81 | 0.87 | 0.79 | 0.84 | 0.81 | 0.66 | 0.54 | 0.47 | 0.40 | 0.31 | 0.24 | 0.18 | 0.13 | 0.09 | 0.07 | 0.05 | 0.03 | 0.02 | 0.01 | 0.01 | 0.01 | 0.00 |
| 9332.40  | 0.15 | 0.55 | 0.83 | 0.86 | 0.81 | 0.90 | 0.81 | 0.64 | 0.55 | 0.50 | 0.41 | 0.30 | 0.24 | 0.17 | 0.12 | 0.09 | 0.06 | 0.04 | 0.03 | 0.02 | 0.01 | 0.01 | 0.01 | 0.00 |
| 9999.00  | 0.18 | 0.60 | 0.87 | 0.85 | 0.85 | 0.91 | 0.79 | 0.63 | 0.58 | 0.50 | 0.40 | 0.30 | 0.23 | 0.17 | 0.12 | 0.09 | 0.06 | 0.04 | 0.03 | 0.02 | 0.01 | 0.01 | 0.01 | 0.00 |
| 10665.60 | 0.21 | 0.63 | 0.91 | 0.85 | 0.90 | 0.89 | 0.76 | 0.63 | 0.59 | 0.50 | 0.39 | 0.29 | 0.22 | 0.16 | 0.12 | 0.08 | 0.06 | 0.04 | 0.03 | 0.02 | 0.01 | 0.01 | 0.01 | 0.00 |
| 11332.20 | 0.24 | 0.66 | 0.97 | 0.87 | 0.96 | 0.91 | 0.75 | 0.66 | 0.60 | 0.50 | 0.38 | 0.28 | 0.22 | 0.17 | 0.12 | 0.08 | 0.06 | 0.04 | 0.03 | 0.02 | 0.01 | 0.01 | 0.01 | 0.00 |
| 11998.80 | 0.27 | 0.69 | 0.98 | 0.88 | 0.98 | 0.91 | 0.74 | 0.68 | 0.61 | 0.50 | 0.38 | 0.29 | 0.22 | 0.17 | 0.13 | 0.09 | 0.06 | 0.04 | 0.03 | 0.02 | 0.01 | 0.01 | 0.01 | 0.00 |
| 12665.40 | 0.28 | 0.72 | 0.97 | 0.90 | 0.99 | 0.88 | 0.74 | 0.70 | 0.60 | 0.49 | 0.38 | 0.29 | 0.23 | 0.18 | 0.13 | 0.09 | 0.07 | 0.05 | 0.03 | 0.02 | 0.02 | 0.01 | 0.01 | 0.00 |
| 13332.00 | 0.31 | 0.75 | 0.96 | 0.93 | 0.99 | 0.85 | 0.75 | 0.70 | 0.60 | 0.49 | 0.38 | 0.30 | 0.24 | 0.19 | 0.13 | 0.10 | 0.07 | 0.05 | 0.04 | 0.03 | 0.02 | 0.01 | 0.01 | 0.00 |
| 13998.60 | 0.34 | 0.78 | 0.94 | 0.97 | 1.00 | 0.84 | 0.77 | 0.70 | 0.61 | 0.49 | 0.39 | 0.32 | 0.25 | 0.19 | 0.14 | 0.11 | 0.08 | 0.06 | 0.04 | 0.03 | 0.02 | 0.01 | 0.01 | 0.00 |
| 14665.20 | 0.37 | 0.80 | 0.94 | 1.01 | 1.00 | 0.84 | 0.78 | 0.72 | 0.60 | 0.49 | 0.40 | 0.33 | 0.26 | 0.20 | 0.15 | 0.11 | 0.08 | 0.06 | 0.04 | 0.03 | 0.02 | 0.01 | 0.01 | 0.00 |

**Table S29.** Conformational population as a function of the hexapole voltage (HV) of 2-chloroethanol in 0.5 m hexapole for  $\Theta_v=100$  K, 200 K and 300 K.

| HV       | $\Theta_v=300$ K |          |          |          |          | $\Theta_v=200$ K |          |          |          |          | $\Theta_v=100$ K |          |          |          |          |
|----------|------------------|----------|----------|----------|----------|------------------|----------|----------|----------|----------|------------------|----------|----------|----------|----------|
|          | Aa               | As       | Sa       | Ss+      | Ss-      | Aa               | As       | Sa       | Ss+      | Ss-      | Aa               | As       | Sa       | Ss+      | Ss-      |
| 0.00E+00 | 0.00E+00         | 0.00E+00 | 0.00E+00 | 0.00E+00 | 0.00E+00 | 0.00E+00         | 0.00E+00 | 0.00E+00 | 0.00E+00 | 0.00E+00 | 0.00E+00         | 0.00E+00 | 0.00E+00 | 0.00E+00 | 0.00E+00 |
| 6.67E+02 | 2.08E-04         | 4.58E-08 | 3.76E-04 | 0.00E+00 | 2.56E-05 | 5.26E-05         | 1.16E-08 | 5.31E-05 | 0.00E+00 | 2.53E-06 | 6.56E-07         | 1.47E-10 | 1.15E-07 | 0.00E+00 | 1.89E-09 |
| 1.33E+03 | 1.28E-03         | 2.52E-04 | 1.20E-03 | 0.00E+00 | 2.78E-04 | 3.24E-04         | 6.41E-05 | 1.70E-04 | 0.00E+00 | 2.75E-05 | 4.04E-06         | 8.09E-07 | 3.68E-07 | 0.00E+00 | 2.05E-08 |
| 2.00E+03 | 2.49E-03         | 7.59E-04 | 2.15E-03 | 5.88E-06 | 5.17E-04 | 6.30E-04         | 1.93E-04 | 3.04E-04 | 6.47E-06 | 5.11E-05 | 7.86E-06         | 2.43E-06 | 6.59E-07 | 6.64E-06 | 3.81E-08 |
| 2.67E+03 | 3.80E-03         | 1.37E-03 | 7.24E-03 | 1.57E-04 | 7.41E-04 | 9.61E-04         | 3.47E-04 | 1.02E-03 | 1.72E-04 | 7.33E-05 | 1.20E-05         | 4.38E-06 | 2.22E-06 | 1.77E-04 | 5.47E-08 |
| 3.33E+03 | 8.41E-03         | 1.94E-03 | 1.90E-02 | 3.83E-04 | 9.99E-04 | 2.13E-03         | 4.93E-04 | 2.68E-03 | 4.21E-04 | 9.88E-05 | 2.65E-05         | 6.22E-06 | 5.81E-06 | 4.33E-04 | 7.37E-08 |
| 4.00E+03 | 1.98E-02         | 2.51E-03 | 3.07E-02 | 5.95E-04 | 2.29E-03 | 5.02E-03         | 6.37E-04 | 4.34E-03 | 6.55E-04 | 2.26E-04 | 6.26E-05         | 8.03E-06 | 9.41E-06 | 6.72E-04 | 1.69E-07 |
| 4.67E+03 | 3.17E-02         | 3.04E-03 | 4.32E-02 | 7.85E-04 | 6.33E-03 | 8.02E-03         | 7.73E-04 | 6.10E-03 | 8.64E-04 | 6.26E-04 | 1.00E-04         | 9.75E-06 | 1.32E-05 | 8.88E-04 | 4.67E-07 |
| 5.33E+03 | 4.48E-02         | 3.99E-03 | 5.50E-02 | 9.68E-04 | 1.13E-02 | 1.13E-02         | 1.01E-03 | 7.76E-03 | 1.07E-03 | 1.11E-03 | 1.41E-04         | 1.28E-05 | 1.68E-05 | 1.09E-03 | 8.31E-07 |
| 6.00E+03 | 6.16E-02         | 7.14E-03 | 6.63E-02 | 1.17E-03 | 1.58E-02 | 1.56E-02         | 1.81E-03 | 9.36E-03 | 1.29E-03 | 1.56E-03 | 1.94E-04         | 2.29E-05 | 2.03E-05 | 1.33E-03 | 1.16E-06 |
| 6.67E+03 | 7.53E-02         | 1.32E-02 | 7.56E-02 | 1.62E-03 | 2.04E-02 | 1.91E-02         | 3.36E-03 | 1.07E-02 | 1.78E-03 | 2.02E-03 | 2.38E-04         | 4.24E-05 | 2.32E-05 | 1.83E-03 | 1.50E-06 |
| 7.33E+03 | 8.69E-02         | 2.05E-02 | 8.40E-02 | 2.44E-03 | 2.52E-02 | 2.20E-02         | 5.22E-03 | 1.19E-02 | 2.68E-03 | 2.49E-03 | 2.74E-04         | 6.59E-05 | 2.57E-05 | 2.76E-03 | 1.86E-06 |
| 8.00E+03 | 1.00E-01         | 2.76E-02 | 8.99E-02 | 3.39E-03 | 3.01E-02 | 2.54E-02         | 7.02E-03 | 1.27E-02 | 3.73E-03 | 2.98E-03 | 3.17E-04         | 8.85E-05 | 2.75E-05 | 3.83E-03 | 2.22E-06 |
| 8.67E+03 | 1.16E-01         | 3.41E-02 | 9.40E-02 | 4.23E-03 | 3.51E-02 | 2.94E-02         | 8.66E-03 | 1.33E-02 | 4.66E-03 | 3.47E-03 | 3.66E-04         | 1.09E-04 | 2.88E-05 | 4.78E-03 | 2.59E-06 |
| 9.33E+03 | 1.32E-01         | 4.10E-02 | 9.81E-02 | 4.99E-03 | 3.99E-02 | 3.35E-02         | 1.04E-02 | 1.39E-02 | 5.49E-03 | 3.95E-03 | 4.18E-04         | 1.31E-04 | 3.01E-05 | 5.64E-03 | 2.95E-06 |
| 1.00E+04 | 1.45E-01         | 4.94E-02 | 1.01E-01 | 6.26E-03 | 4.43E-02 | 3.67E-02         | 1.25E-02 | 1.43E-02 | 6.89E-03 | 4.38E-03 | 4.57E-04         | 1.58E-04 | 3.10E-05 | 7.08E-03 | 3.27E-06 |
| 1.07E+04 | 1.54E-01         | 5.91E-02 | 1.06E-01 | 9.18E-03 | 4.81E-02 | 3.89E-02         | 1.50E-02 | 1.49E-02 | 1.01E-02 | 4.76E-03 | 4.85E-04         | 1.89E-04 | 3.23E-05 | 1.04E-02 | 3.55E-06 |
| 1.13E+04 | 1.60E-01         | 6.81E-02 | 1.10E-01 | 1.45E-02 | 5.10E-02 | 4.06E-02         | 1.73E-02 | 1.55E-02 | 1.59E-02 | 5.04E-03 | 5.06E-04         | 2.18E-04 | 3.36E-05 | 1.63E-02 | 3.76E-06 |
| 1.20E+04 | 1.68E-01         | 7.57E-02 | 1.14E-01 | 2.39E-02 | 5.30E-02 | 4.24E-02         | 1.92E-02 | 1.60E-02 | 2.63E-02 | 5.25E-03 | 5.29E-04         | 2.43E-04 | 3.48E-05 | 2.70E-02 | 3.91E-06 |
| 1.27E+04 | 1.76E-01         | 8.27E-02 | 1.16E-01 | 3.91E-02 | 5.43E-02 | 4.45E-02         | 2.10E-02 | 1.64E-02 | 4.30E-02 | 5.37E-03 | 5.56E-04         | 2.65E-04 | 3.56E-05 | 4.42E-02 | 4.00E-06 |
| 1.33E+04 | 1.86E-01         | 9.01E-02 | 1.20E-01 | 6.28E-02 | 5.54E-02 | 4.71E-02         | 2.29E-02 | 1.69E-02 | 6.91E-02 | 5.48E-03 | 5.87E-04         | 2.89E-04 | 3.67E-05 | 7.10E-02 | 4.09E-06 |
| 1.40E+04 | 1.96E-01         | 9.86E-02 | 1.24E-01 | 9.89E-02 | 5.67E-02 | 4.95E-02         | 2.51E-02 | 1.75E-02 | 1.09E-01 | 5.61E-03 | 6.17E-04         | 3.16E-04 | 3.79E-05 | 1.12E-01 | 4.18E-06 |
| 1.47E+04 | 2.03E-01         | 1.08E-01 | 1.28E-01 | 1.49E-01 | 5.81E-02 | 5.14E-02         | 2.74E-02 | 1.80E-02 | 1.64E-01 | 5.75E-03 | 6.41E-04         | 3.46E-04 | 3.91E-05 | 1.68E-01 | 4.29E-06 |

**Table S30.** Conformational population as a function of the hexapole voltage (HV) of 2-chloroethanol in 1 m hexapole for  $\Theta_V=100$  K, 200 K and 300 K.

|          | $\Theta_V=300$ K |           |          |          |          |          | $\Theta_V=200$ K |          |          |          |          |           | $\Theta_V=100$ K |          |          |  |  |  |
|----------|------------------|-----------|----------|----------|----------|----------|------------------|----------|----------|----------|----------|-----------|------------------|----------|----------|--|--|--|
| HV       | Aa               | As        | Sa       | Ss+      | Ss-      | Aa       | As               | Sa       | Ss+      | Ss-      | Aa       | As        | Sa               | Ss+      | Ss-      |  |  |  |
| 0        | 2.06E-03         | 1.86E-03  | 5.19E-04 | 5.94E-03 | 4.48E-04 | 5.21E-04 | 4.73E-04         | 7.33E-05 | 6.54E-03 | 4.43E-05 | 9.59E-10 | 9.02E-10  | 7.10E-13         | 6.71E-03 | 1.74E-14 |  |  |  |
| 6.67E+02 | 0.00E+00         | 0.00E+00  | 0.00E+00 | 3.83E-03 | 0.00E+00 | 0.00E+00 | 0.00E+00         | 0.00E+00 | 4.21E-03 | 0.00E+00 | 0.00E+00 | 0.00E+00  | 0.00E+00         | 4.33E-03 | 0.00E+00 |  |  |  |
| 1.33E+03 | 5.44E-03         | -1.96E-04 | 1.52E-02 | 1.77E-03 | 3.72E-04 | 1.38E-03 | -4.97E-05        | 2.15E-03 | 1.95E-03 | 3.68E-05 | 2.53E-09 | -9.47E-11 | 2.08E-11         | 2.00E-03 | 1.45E-14 |  |  |  |
| 2.00E+03 | 3.02E-02         | 5.21E-04  | 3.99E-02 | 8.02E-04 | 7.30E-03 | 7.63E-03 | 1.32E-04         | 5.63E-03 | 8.83E-04 | 7.22E-04 | 1.40E-08 | 2.52E-10  | 5.46E-11         | 9.07E-04 | 2.84E-13 |  |  |  |
| 2.67E+03 | 6.04E-02         | 1.00E-02  | 5.93E-02 | 4.08E-04 | 1.66E-02 | 1.53E-02 | 2.54E-03         | 8.37E-03 | 4.49E-04 | 1.64E-03 | 2.81E-08 | 4.84E-09  | 8.11E-11         | 4.62E-04 | 6.44E-13 |  |  |  |
| 3.33E+03 | 8.94E-02         | 2.41E-02  | 6.84E-02 | 0.00E+00 | 2.60E-02 | 2.26E-02 | 6.13E-03         | 9.67E-03 | 0.00E+00 | 2.57E-03 | 4.16E-08 | 1.17E-08  | 9.36E-11         | 0.00E+00 | 1.01E-12 |  |  |  |
| 4.00E+03 | 1.15E-01         | 4.13E-02  | 7.50E-02 | 2.90E-04 | 3.45E-02 | 2.91E-02 | 1.05E-02         | 1.06E-02 | 3.20E-04 | 3.41E-03 | 5.35E-08 | 2.00E-08  | 1.03E-10         | 3.28E-04 | 1.34E-12 |  |  |  |
| 4.67E+03 | 1.28E-01         | 5.72E-02  | 8.22E-02 | 8.49E-03 | 3.83E-02 | 3.24E-02 | 1.45E-02         | 1.16E-02 | 9.34E-03 | 3.79E-03 | 5.96E-08 | 2.77E-08  | 1.12E-10         | 9.60E-03 | 1.49E-12 |  |  |  |
| 5.33E+03 | 1.48E-01         | 7.21E-02  | 8.94E-02 | 5.07E-02 | 3.98E-02 | 3.75E-02 | 1.83E-02         | 1.26E-02 | 5.58E-02 | 3.94E-03 | 6.90E-08 | 3.49E-08  | 1.22E-10         | 5.74E-02 | 1.55E-12 |  |  |  |
| 6.00E+03 | 1.60E-01         | 9.19E-02  | 9.61E-02 | 1.71E-01 | 4.15E-02 | 4.04E-02 | 2.33E-02         | 1.36E-02 | 1.88E-01 | 4.11E-03 | 7.44E-08 | 4.45E-08  | 1.31E-10         | 1.93E-01 | 1.62E-12 |  |  |  |
| 6.67E+03 | 1.69E-01         | 1.12E-01  | 1.01E-01 | 4.14E-01 | 4.40E-02 | 4.27E-02 | 2.84E-02         | 1.42E-02 | 4.56E-01 | 4.35E-03 | 7.87E-08 | 5.41E-08  | 1.38E-10         | 4.68E-01 | 1.71E-12 |  |  |  |
| 7.33E+03 | 1.80E-01         | 1.26E-01  | 1.09E-01 | 7.24E-01 | 4.70E-02 | 4.54E-02 | 3.19E-02         | 1.53E-02 | 7.97E-01 | 4.65E-03 | 8.36E-08 | 6.09E-08  | 1.48E-10         | 8.19E-01 | 1.83E-12 |  |  |  |
| 8.00E+03 | 1.86E-01         | 1.36E-01  | 1.15E-01 | 9.41E-01 | 5.04E-02 | 4.71E-02 | 3.46E-02         | 1.62E-02 | 1.04E+00 | 4.98E-03 | 8.67E-08 | 6.60E-08  | 1.57E-10         | 1.06E+00 | 1.96E-12 |  |  |  |
| 8.67E+03 | 1.90E-01         | 1.51E-01  | 1.19E-01 | 1.07E+00 | 5.35E-02 | 4.81E-02 | 3.83E-02         | 1.68E-02 | 1.18E+00 | 5.29E-03 | 8.85E-08 | 7.30E-08  | 1.63E-10         | 1.21E+00 | 2.08E-12 |  |  |  |
| 9.33E+03 | 1.98E-01         | 1.69E-01  | 1.23E-01 | 1.16E+00 | 5.64E-02 | 5.02E-02 | 4.29E-02         | 1.74E-02 | 1.28E+00 | 5.57E-03 | 9.24E-08 | 8.19E-08  | 1.68E-10         | 1.32E+00 | 2.19E-12 |  |  |  |
| 1.00E+04 | 2.09E-01         | 1.85E-01  | 1.27E-01 | 1.24E+00 | 5.84E-02 | 5.29E-02 | 4.70E-02         | 1.79E-02 | 1.37E+00 | 5.78E-03 | 9.74E-08 | 8.97E-08  | 1.74E-10         | 1.40E+00 | 2.27E-12 |  |  |  |
| 1.07E+04 | 2.16E-01         | 1.99E-01  | 1.30E-01 | 1.32E+00 | 6.07E-02 | 5.47E-02 | 5.04E-02         | 1.84E-02 | 1.45E+00 | 6.01E-03 | 1.01E-07 | 9.62E-08  | 1.78E-10         | 1.49E+00 | 2.36E-12 |  |  |  |
| 1.13E+04 | 2.22E-01         | 2.11E-01  | 1.34E-01 | 1.40E+00 | 6.29E-02 | 5.62E-02 | 5.37E-02         | 1.90E-02 | 1.55E+00 | 6.22E-03 | 1.03E-07 | 1.02E-07  | 1.84E-10         | 1.59E+00 | 2.45E-12 |  |  |  |
| 1.20E+04 | 2.30E-01         | 2.23E-01  | 1.38E-01 | 1.49E+00 | 6.53E-02 | 5.83E-02 | 5.68E-02         | 1.95E-02 | 1.63E+00 | 6.46E-03 | 1.07E-07 | 1.08E-07  | 1.89E-10         | 1.68E+00 | 2.54E-12 |  |  |  |
| 1.27E+04 | 2.40E-01         | 2.35E-01  | 1.41E-01 | 1.58E+00 | 6.75E-02 | 6.06E-02 | 5.97E-02         | 1.99E-02 | 1.73E+00 | 6.67E-03 | 1.12E-07 | 1.14E-07  | 1.93E-10         | 1.78E+00 | 2.62E-12 |  |  |  |
| 1.33E+04 | 2.50E-01         | 2.45E-01  | 1.43E-01 | 1.67E+00 | 6.94E-02 | 6.32E-02 | 6.24E-02         | 2.02E-02 | 1.84E+00 | 6.86E-03 | 1.16E-07 | 1.19E-07  | 1.96E-10         | 1.89E+00 | 2.70E-12 |  |  |  |
| 1.40E+04 | 2.63E-01         | 2.55E-01  | 1.44E-01 | 1.79E+00 | 7.12E-02 | 6.66E-02 | 6.47E-02         | 2.03E-02 | 1.97E+00 | 7.04E-03 | 1.23E-07 | 1.23E-07  | 1.96E-10         | 2.02E+00 | 2.77E-12 |  |  |  |
| 1.47E+04 | 2.75E-01         | 2.61E-01  | 1.43E-01 | 1.91E+00 | 7.25E-02 | 6.96E-02 | 6.63E-02         | 2.02E-02 | 2.10E+00 | 7.17E-03 | 1.28E-07 | 1.26E-07  | 1.95E-10         | 2.16E+00 | 2.82E-12 |  |  |  |

**Table S31.** Conformational population as a function of the hexapole voltage (HV) of 2-chloroethanol in 2 m hexapole for  $\Theta_V=100$  K, 200 K and 300 K.

| HV       | $\Theta_V=300$ K |          |          |          |          |  | $\Theta_V=200$ K |          |          |          |          |  | $\Theta_V=100$ K |          |          |          |          |  |
|----------|------------------|----------|----------|----------|----------|--|------------------|----------|----------|----------|----------|--|------------------|----------|----------|----------|----------|--|
|          | Aa               | As       | Sa       | Ss+      | Ss-      |  | Aa               | As       | Sa       | Ss+      | Ss-      |  | Aa               | As       | Sa       | Ss+      | Ss-      |  |
| 0.00E+00 | 0.00E+00         | 0.00E+00 | 0.00E+00 | 0.00E+00 | 0.00E+00 |  | 0.00E+00         | 0.00E+00 | 0.00E+00 | 0.00E+00 | 0.00E+00 |  | 0.00E+00         | 0.00E+00 | 0.00E+00 | 0.00E+00 | 0.00E+00 |  |
| 6.67E+02 | 8.05E-02         | 1.02E-03 | 2.54E-02 | 7.67E-05 | 4.74E-03 |  | 2.04E-02         | 2.59E-04 | 3.59E-03 | 8.44E-05 | 4.69E-04 |  | 3.75E-08         | 4.94E-10 | 3.48E-11 | 8.67E-05 | 1.84E-13 |  |
| 1.33E+03 | 1.14E-01         | 2.77E-02 | 4.43E-02 | 5.90E-04 | 2.14E-02 |  | 2.89E-02         | 7.03E-03 | 6.25E-03 | 6.49E-04 | 2.11E-03 |  | 5.31E-08         | 1.34E-08 | 6.05E-11 | 6.67E-04 | 8.32E-13 |  |
| 2.00E+03 | 1.86E-01         | 5.90E-02 | 5.51E-02 | 1.03E-01 | 2.42E-02 |  | 4.70E-02         | 1.50E-02 | 7.79E-03 | 1.14E-01 | 2.39E-03 |  | 8.66E-08         | 2.86E-08 | 7.54E-11 | 1.17E-01 | 9.40E-13 |  |
| 2.67E+03 | 2.24E-01         | 8.53E-02 | 6.65E-02 | 5.65E-01 | 2.85E-02 |  | 5.66E-02         | 2.17E-02 | 9.40E-03 | 6.22E-01 | 2.82E-03 |  | 1.04E-07         | 4.13E-08 | 9.10E-11 | 6.39E-01 | 1.11E-12 |  |
| 3.33E+03 | 2.37E-01         | 1.14E-01 | 7.63E-02 | 7.21E-01 | 3.30E-02 |  | 6.00E-02         | 2.90E-02 | 1.08E-02 | 7.94E-01 | 3.27E-03 |  | 1.10E-07         | 5.52E-08 | 1.04E-10 | 8.16E-01 | 1.29E-12 |  |
| 4.00E+03 | 2.54E-01         | 1.36E-01 | 8.59E-02 | 8.54E-01 | 3.69E-02 |  | 6.43E-02         | 3.44E-02 | 1.21E-02 | 9.40E-01 | 3.65E-03 |  | 1.18E-07         | 6.57E-08 | 1.17E-10 | 9.66E-01 | 1.44E-12 |  |
| 4.67E+03 | 2.73E-01         | 1.51E-01 | 9.06E-02 | 1.01E+00 | 4.14E-02 |  | 6.92E-02         | 3.83E-02 | 1.28E-02 | 1.11E+00 | 4.10E-03 |  | 1.27E-07         | 7.29E-08 | 1.24E-10 | 1.14E+00 | 1.61E-12 |  |
| 5.33E+03 | 2.99E-01         | 1.59E-01 | 9.62E-02 | 1.21E+00 | 4.57E-02 |  | 7.56E-02         | 4.04E-02 | 1.36E-02 | 1.33E+00 | 4.52E-03 |  | 1.39E-07         | 7.71E-08 | 1.32E-10 | 1.37E+00 | 1.78E-12 |  |
| 6.00E+03 | 3.22E-01         | 1.71E-01 | 1.02E-01 | 1.43E+00 | 4.90E-02 |  | 8.16E-02         | 4.36E-02 | 1.44E-02 | 1.58E+00 | 4.85E-03 |  | 1.50E-07         | 8.30E-08 | 1.40E-10 | 1.62E+00 | 1.91E-12 |  |
| 6.67E+03 | 3.44E-01         | 1.80E-01 | 1.07E-01 | 1.64E+00 | 5.09E-02 |  | 8.70E-02         | 4.58E-02 | 1.51E-02 | 1.80E+00 | 5.04E-03 |  | 1.60E-07         | 8.72E-08 | 1.47E-10 | 1.85E+00 | 1.98E-12 |  |
| 7.33E+03 | 3.58E-01         | 1.89E-01 | 1.13E-01 | 1.84E+00 | 5.28E-02 |  | 9.05E-02         | 4.79E-02 | 1.59E-02 | 2.03E+00 | 5.22E-03 |  | 1.67E-07         | 9.14E-08 | 1.54E-10 | 2.08E+00 | 2.05E-12 |  |
| 8.00E+03 | 3.68E-01         | 2.02E-01 | 1.18E-01 | 2.09E+00 | 5.47E-02 |  | 9.30E-02         | 5.14E-02 | 1.67E-02 | 2.30E+00 | 5.41E-03 |  | 1.71E-07         | 9.80E-08 | 1.62E-10 | 2.37E+00 | 2.13E-12 |  |
| 8.67E+03 | 3.71E-01         | 2.16E-01 | 1.22E-01 | 2.37E+00 | 5.65E-02 |  | 9.38E-02         | 5.50E-02 | 1.72E-02 | 2.61E+00 | 5.59E-03 |  | 1.73E-07         | 1.05E-07 | 1.66E-10 | 2.68E+00 | 2.20E-12 |  |
| 9.33E+03 | 3.77E-01         | 2.26E-01 | 1.25E-01 | 2.69E+00 | 5.86E-02 |  | 9.53E-02         | 5.75E-02 | 1.77E-02 | 2.96E+00 | 5.80E-03 |  | 1.75E-07         | 1.10E-07 | 1.71E-10 | 3.04E+00 | 2.28E-12 |  |
| 1.00E+04 | 3.82E-01         | 2.33E-01 | 1.29E-01 | 3.00E+00 | 6.05E-02 |  | 9.66E-02         | 5.91E-02 | 1.82E-02 | 3.30E+00 | 5.98E-03 |  | 1.78E-07         | 1.13E-07 | 1.76E-10 | 3.39E+00 | 2.35E-12 |  |
| 1.07E+04 | 3.85E-01         | 2.39E-01 | 1.30E-01 | 3.27E+00 | 6.24E-02 |  | 9.74E-02         | 6.07E-02 | 1.84E-02 | 3.60E+00 | 6.18E-03 |  | 1.79E-07         | 1.16E-07 | 1.78E-10 | 3.70E+00 | 2.43E-12 |  |
| 1.13E+04 | 3.96E-01         | 2.48E-01 | 1.33E-01 | 3.51E+00 | 6.44E-02 |  | 1.00E-01         | 6.30E-02 | 1.88E-02 | 3.86E+00 | 6.37E-03 |  | 1.84E-07         | 1.20E-07 | 1.82E-10 | 3.96E+00 | 2.51E-12 |  |
| 1.20E+04 | 4.02E-01         | 2.59E-01 | 1.36E-01 | 3.71E+00 | 6.64E-02 |  | 1.02E-01         | 6.57E-02 | 1.92E-02 | 4.08E+00 | 6.57E-03 |  | 1.87E-07         | 1.25E-07 | 1.86E-10 | 4.19E+00 | 2.58E-12 |  |
| 1.27E+04 | 4.06E-01         | 2.70E-01 | 1.37E-01 | 3.89E+00 | 6.80E-02 |  | 1.03E-01         | 6.85E-02 | 1.93E-02 | 4.28E+00 | 6.72E-03 |  | 1.89E-07         | 1.31E-07 | 1.87E-10 | 4.39E+00 | 2.64E-12 |  |
| 1.33E+04 | 4.11E-01         | 2.77E-01 | 1.38E-01 | 4.06E+00 | 6.89E-02 |  | 1.04E-01         | 7.04E-02 | 1.94E-02 | 4.47E+00 | 6.81E-03 |  | 1.91E-07         | 1.34E-07 | 1.88E-10 | 4.59E+00 | 2.68E-12 |  |
| 1.40E+04 | 4.18E-01         | 2.83E-01 | 1.38E-01 | 4.23E+00 | 6.95E-02 |  | 1.06E-01         | 7.18E-02 | 1.95E-02 | 4.65E+00 | 6.88E-03 |  | 1.94E-07         | 1.37E-07 | 1.89E-10 | 4.78E+00 | 2.70E-12 |  |
| 1.47E+04 | 4.25E-01         | 2.87E-01 | 1.39E-01 | 4.37E+00 | 7.04E-02 |  | 1.08E-01         | 7.29E-02 | 1.97E-02 | 4.81E+00 | 6.97E-03 |  | 1.98E-07         | 1.39E-07 | 1.90E-10 | 4.94E+00 | 2.74E-12 |  |

**Table S32.** Conformational population as a function of the hexapole voltage (HV) of 1-chloroethanol in 0.5 m hexapole for  $\Theta_V=100$  K, 200 K and 300 K.

| HV       | $\Theta_V=300$ K |      | $\Theta_V=200$ K |      | $\Theta_V=100$ K |      |
|----------|------------------|------|------------------|------|------------------|------|
|          | A                | S    | A                | S    | A                | S    |
| 0.00     | 0.00             | 0.00 | 0.00             | 0.00 | 0.00             | 0.00 |
| 666.60   | 0.01             | 0.01 | 0.01             | 0.00 | 0.01             | 0.00 |
| 1333.20  | 0.04             | 0.02 | 0.05             | 0.01 | 0.06             | 0.00 |
| 1999.80  | 0.07             | 0.04 | 0.08             | 0.02 | 0.10             | 0.01 |
| 2666.40  | 0.11             | 0.09 | 0.12             | 0.06 | 0.14             | 0.02 |
| 3333.00  | 0.20             | 0.34 | 0.22             | 0.23 | 0.26             | 0.07 |
| 3999.60  | 0.78             | 0.64 | 0.88             | 0.44 | 1.03             | 0.14 |
| 4666.20  | 1.55             | 0.90 | 1.75             | 0.62 | 2.05             | 0.19 |
| 5332.80  | 2.25             | 1.09 | 2.54             | 0.75 | 2.97             | 0.23 |
| 5999.40  | 2.90             | 1.23 | 3.26             | 0.85 | 3.82             | 0.26 |
| 6666.00  | 3.45             | 1.34 | 3.88             | 0.92 | 4.55             | 0.29 |
| 7332.60  | 3.93             | 1.41 | 4.43             | 0.97 | 5.19             | 0.30 |
| 7999.20  | 4.36             | 1.47 | 4.91             | 1.01 | 5.75             | 0.32 |
| 8665.80  | 4.72             | 1.56 | 5.32             | 1.08 | 6.23             | 0.33 |
| 9332.40  | 5.03             | 1.68 | 5.67             | 1.16 | 6.64             | 0.36 |
| 9999.00  | 5.31             | 1.78 | 5.99             | 1.23 | 7.01             | 0.38 |
| 10665.60 | 5.57             | 1.90 | 6.28             | 1.31 | 7.35             | 0.41 |
| 11332.20 | 5.82             | 2.03 | 6.56             | 1.40 | 7.68             | 0.44 |
| 11998.80 | 6.04             | 2.16 | 6.81             | 1.49 | 7.97             | 0.46 |
| 12665.40 | 6.22             | 2.27 | 7.01             | 1.56 | 8.21             | 0.49 |
| 13332.00 | 6.41             | 2.37 | 7.23             | 1.64 | 8.46             | 0.51 |
| 13998.60 | 6.61             | 2.47 | 7.45             | 1.70 | 8.72             | 0.53 |
| 14665.20 | 6.81             | 2.55 | 7.67             | 1.76 | 8.98             | 0.55 |

**Table S33.** Conformational population as a function of the hexapole voltage (HV) of 1-chloroethanol in 1 m hexapole for  $\Theta_V=100$  K, 200 K and 300 K.

| HV       | $\Theta_V=300$ K |      | $\Theta_V=200$ K |      | $\Theta_V=100$ K |      |
|----------|------------------|------|------------------|------|------------------|------|
|          | A                | S    | A                | S    | A                | S    |
| 0.00     | 0.05             | 0.01 | 0.05             | 0.01 | 0.06             | 0.00 |
| 666.60   | 0.00             | 0.00 | 0.00             | 0.00 | 0.00             | 0.00 |
| 1333.20  | 0.15             | 0.27 | 0.16             | 0.19 | 0.19             | 0.06 |
| 1999.80  | 1.56             | 0.78 | 1.76             | 0.54 | 2.06             | 0.17 |
| 2666.40  | 2.75             | 0.97 | 3.10             | 0.67 | 3.63             | 0.21 |
| 3333.00  | 3.50             | 1.05 | 3.95             | 0.72 | 4.62             | 0.22 |
| 3999.60  | 3.89             | 1.25 | 4.39             | 0.86 | 5.14             | 0.27 |
| 4666.20  | 4.14             | 1.52 | 4.66             | 1.05 | 5.46             | 0.33 |
| 5332.80  | 4.30             | 1.78 | 4.84             | 1.22 | 5.67             | 0.38 |
| 5999.40  | 4.59             | 1.92 | 5.17             | 1.32 | 6.05             | 0.41 |
| 6666.00  | 5.02             | 2.05 | 5.66             | 1.41 | 6.63             | 0.44 |
| 7332.60  | 5.34             | 2.19 | 6.02             | 1.51 | 7.04             | 0.47 |
| 7999.20  | 5.61             | 2.28 | 6.32             | 1.57 | 7.40             | 0.49 |
| 8665.80  | 5.87             | 2.33 | 6.61             | 1.60 | 7.75             | 0.50 |
| 9332.40  | 6.14             | 2.35 | 6.92             | 1.62 | 8.10             | 0.51 |
| 9999.00  | 6.35             | 2.40 | 7.15             | 1.65 | 8.37             | 0.51 |
| 10665.60 | 6.49             | 2.45 | 7.31             | 1.68 | 8.56             | 0.52 |
| 11332.20 | 6.66             | 2.48 | 7.50             | 1.71 | 8.78             | 0.53 |
| 11998.80 | 6.85             | 2.50 | 7.72             | 1.72 | 9.04             | 0.54 |
| 12665.40 | 6.98             | 2.53 | 7.86             | 1.74 | 9.21             | 0.54 |
| 13332.00 | 7.05             | 2.57 | 7.95             | 1.77 | 9.30             | 0.55 |
| 13998.60 | 7.10             | 2.61 | 8.00             | 1.80 | 9.37             | 0.56 |
| 14665.20 | 7.11             | 2.65 | 8.01             | 1.82 | 9.38             | 0.57 |

**Table S34.** Conformational population as a function of the hexapole voltage (HV) of 1-chloroethanol in 2 m hexapole for  $\Theta_V=100$  K, 200 K and 300 K.

| HV       | $\Theta_V=300$ K |      | $\Theta_V=200$ K |      | $\Theta_V=100$ K |      |
|----------|------------------|------|------------------|------|------------------|------|
|          | A                | S    | A                | S    | A                | S    |
| 0.00     | 0.00             | 0.00 | 0.00             | 0.00 | 0.00             | 0.00 |
| 666.60   | 1.00             | 0.50 | 1.13             | 0.34 | 1.32             | 0.11 |
| 1333.20  | 2.34             | 0.71 | 2.64             | 0.49 | 3.09             | 0.15 |
| 1999.80  | 2.62             | 1.15 | 2.95             | 0.79 | 3.45             | 0.25 |
| 2666.40  | 3.15             | 1.38 | 3.54             | 0.95 | 4.15             | 0.30 |
| 3333.00  | 3.60             | 1.47 | 4.06             | 1.01 | 4.75             | 0.31 |
| 3999.60  | 4.02             | 1.57 | 4.53             | 1.08 | 5.31             | 0.34 |
| 4666.20  | 4.40             | 1.69 | 4.96             | 1.16 | 5.80             | 0.36 |
| 5332.80  | 4.67             | 1.85 | 5.26             | 1.27 | 6.16             | 0.40 |
| 5999.40  | 4.92             | 1.99 | 5.55             | 1.37 | 6.50             | 0.43 |
| 6666.00  | 5.13             | 2.13 | 5.78             | 1.46 | 6.76             | 0.46 |
| 7332.60  | 5.34             | 2.21 | 6.02             | 1.52 | 7.04             | 0.47 |
| 7999.20  | 5.59             | 2.27 | 6.30             | 1.57 | 7.37             | 0.49 |
| 8665.80  | 5.86             | 2.29 | 6.60             | 1.58 | 7.73             | 0.49 |
| 9332.40  | 6.04             | 2.33 | 6.81             | 1.60 | 7.97             | 0.50 |
| 9999.00  | 6.15             | 2.36 | 6.93             | 1.63 | 8.12             | 0.51 |
| 10665.60 | 6.20             | 2.38 | 6.98             | 1.64 | 8.18             | 0.51 |
| 11332.20 | 6.32             | 2.45 | 7.12             | 1.68 | 8.33             | 0.52 |
| 11998.80 | 6.41             | 2.49 | 7.22             | 1.71 | 8.46             | 0.53 |
| 12665.40 | 6.48             | 2.51 | 7.30             | 1.73 | 8.55             | 0.54 |
| 13332.00 | 6.52             | 2.54 | 7.35             | 1.75 | 8.61             | 0.54 |
| 13998.60 | 6.59             | 2.58 | 7.43             | 1.78 | 8.70             | 0.55 |
| 14665.20 | 6.67             | 2.63 | 7.52             | 1.81 | 8.81             | 0.56 |
